# Supplementary material for: Does SARS-CoV-2 Infection Increase Risk of Neuropsychiatric and Related Conditions? Findings from Difference-in-Differences Analyses
Source: Research Square preprint supplement (doi:10.21203/rs.3.rs-5621095/v1), 2025-01-08
Supplement: Supplementary file 1 [file d57a4a81d2939609a5f0a26b.docx]

**Supplementary Material***

Lu Y, Tong J, Zhang D, et al. Does SARS-CoV-2 Infection Increase Risk of Neuropsychiatric and Related Conditions? Findings from Difference-in-Differences Analyses

Table of Contents

[Section 1 Data description 3](#_Toc177083942)

[A. Description of electronic health records data 3](#_Toc177083943)

[B. RECOVER Population and generalizability 3](#_Toc177083944)

[Section 2 Supplemental Methods 5](#_Toc177083945)

[A. Modeling strategy for the difference-in-difference analyses 5](#_Toc177083946)

[B. Study variables 6](#_Toc177083947)

[C. The definition of “increase” in the manuscript 9](#_Toc177083948)

[Section 3 Supplemental Detailed Results 10](#_Toc177083949)

[Section 4 Supplemental Results: patient characteristic balance between groups in primary analysis 12](#_Toc177083950)

[A. Propensity-score (PS) models and matching 12](#_Toc177083951)

[B. Empirical equipoise assessment 13](#_Toc177083952)

[C. Patient characteristic balance in the primary analysis 15](#_Toc177083953)

[Section 5 Supplemental Results: analysis for overall cohort without age stratification 17](#_Toc177083954)

[A. Empirical equipoise assessment 17](#_Toc177083955)

[B. Patient characteristic balance 18](#_Toc177083956)

[C. Risk difference of COVID-19 positive group compared to COVID-19 negative group 19](#_Toc177083957)

[Section 6 Supplemental Results: sensitivity analysis with COVID-19/respiratory negative group 21](#_Toc177083958)

[Section 7 Supplemental Results: sensitivity analysis for sub-variants 26](#_Toc177083959)

[A. Empirical equipoise assessment 26](#_Toc177083960)

[B. Patient characteristic balance 33](#_Toc177083961)

[C. Risk difference of COVID-19 positive group compared to COVID-19 negative group 39](#_Toc177083962)

[Section 8 Supplemental Results: sensitivity analysis for sex 51](#_Toc177083963)

[A. Empirical equipoise assessment 51](#_Toc177083964)

[B. Patient characteristic balance 55](#_Toc177083965)

[C. Risk difference of COVID-19 positive group compared to COVID-19 negative group 59](#_Toc177083966)

[Section 9 Supplemental Results: sensitivity analysis for ethnicity 67](#_Toc177083967)

[A. Empirical equipoise assessment 67](#_Toc177083968)

[B. Patient characteristic balance 75](#_Toc177083969)

[C. Risk difference of COVID-19 positive group compared to COVID-19 negative group 83](#_Toc177083970)

[Section 10 Supplemental Results: sensitivity analysis for obese/non-obese subgroups 99](#_Toc177083971)

[A. Empirical equipoise assessment 99](#_Toc177083972)

[B. Patient characteristic balance 103](#_Toc177083973)

[C. Risk difference of COVID-19 positive group compared to COVID-19 negative group 107](#_Toc177083974)

[Section 11 Supplemental Results: sensitivity analysis for subgroups with different hospitalization status 115](#_Toc177083975)

[A. Empirical equipoise assessment 115](#_Toc177083976)

[B. Patient characteristic balance 121](#_Toc177083977)

[C. Risk difference of COVID-19 positive group compared to COVID-19 negative group 127](#_Toc177083978)

[Section 12 Supplemental Results: sensitivity analysis for subgroups with different levels of COVID-19 severity 139](#_Toc177083979)

[A. Empirical equipoise assessment 139](#_Toc177083980)

[B. Patient characteristic balance 147](#_Toc177083981)

[C. Risk difference of COVID-19 positive group compared to COVID-19 negative group 155](#_Toc177083982)

[Reference 170](#_Toc177083983)

* This supplementary material was provided by the authors to give readers further details on their article. The material was not copyedited.

# Section 1 Data description

## Description of electronic health records data

The real-world data utilized in our analysis is derived from electronic health records (EHRs), covering a wide range of healthcare interaction information routinely collected and stored by hospitals. This includes clinical data such as diagnoses and treatments, laboratory and test results, and administrative data including patient demographics and billing information. The hospital-based EHR data from the Researching COVID to Enhance Recovery (RECOVER) Initiative COVID-19 Database served as the basis for defining and determining exposure, outcomes, and covariates. Unlike General Practitioner (GP) data, self-reported data, or external data sources, our study used the structured, standardized EHR entries made by healthcare providers within hospital settings. EHR data provides a more detailed and integrated view of a patient's health status, medical history, and healthcare interactions across various providers and settings.

## RECOVER Population and generalizability

The National Institutions of Health (NIH) launched the new RECOVER initiative in 2021 to leverage EHR data to better identify and characterize patients with pos-acute sequelae of SARS-CoV-2 infection (PASC). RECOVER obtains EHRs from three large national healthcare networks within the United States, covering regional catchment areas across 41 states. These networks collectively hold the EHRs of over 60 million patients, including records from more than 7 million individuals who have been affected by COVID-19. RECOVER collaborates with the National Institutes of Health's (NIH) All of Us Research Program, which contributes additional health records to this vast database. Together, these sources comprise one of the world's largest collections of EHRs.

In our study, participating institutions in this study included: Ann & Robert H. Lurie Children’s Hospital of Chicago, Children’s Hospital Colorado, Children’s Hospital of Philadelphia, Children’s National Medical Center, Cincinnati Children’s Hospital Medical Center, Duke University, Medical College of Wisconsin, Medical University of South Carolina (MUSC), Montefiore, Nationwide Children’s Hospital, Nemours Children’s Health System (inclusive of the Delaware and Florida health system), New York University School of Medicine, Northwestern University, OCHIN, Seattle Children’s Hospital, Stanford Children’s Health, University of California, San Francisco, University of Iowa Healthcare, University of Michigan, University of Missouri, University of Nebraska Medical Center, University of Pittsburgh, Vanderbilt University Medical Center, Wake Forest Baptist Health, and Weill Cornell Medical College. For this study, we used the s9 version of the data, collected till June 2023, which comprises 6,868,813 patients.

Our study represents the most comprehensive research conducted in the U.S. on PASC in children and youths, analyzing a total of 1,211,388 samples. It features a longer follow-up period than most existing studies targeting this age group in the U.S., specifically covering the timeframes of both the Delta and Omicron variant outbreaks. We recognize the potential limitations of EHR studies, particularly concerning the completeness of longitudinal follow-up for individuals. To mitigate this, our study only included patients who had an encounter within the 24 months prior to the cohort entry. This criterion ensured that the patients included had ongoing interactions with the healthcare system, enhancing the reliability of follow-up data.

# Section 2 Supplemental Methods

## Modeling strategy for the difference-in-difference analyses

For each outcome (i.e., mental health disorder), we use a binary indicator as the SARS-CoV-2 infection status groups ( for SARS-CoV-2 infected/COVID-19 positive cohort, for SARS-CoV-2 uninfected/COVID-19 negative cohort, as the indicator of before or after index date ( for prior to the index date vs. for after the index date), and to denote the occurrence of the specific potential mental health PASC symptoms and conditions.

A Poisson regression model was fitted by regressing the mental health symptoms and conditions on COVID-19 positive/negative groups, before/after index date status, and the interaction between COVID-19 positive/negative groups and before/after index date status:

where is the log link function. The coefficient of the interaction term, , represents the differential increase of differences of outcomes between COVID-19 positive/negative cohorts over time.

## Study variables

**Supp Table 1**. Variables used in the difference-in-difference study of two cohorts evaluating the effect of the SARS-CoV-2 infection on mental health disorders in children aged 5 to 11 years and youths aged 12 to 20 years during the study period.

| Variable | Functional form | Values | Detail | Codes/references |
| --- | --- | --- | --- | --- |
| Treatment  (i.e., Exposure) |  |  |  |  |
| Documented infection | Indicator | Yes/No | Based on the observation and visit occurrence domains. Defined as a polymerase-chain-reaction (PCR), serology, or antigen tests positive for COVID-19, or diagnoses of COVID-19, post-acute sequelae of SARS-CoV-2 (PASC), or multisystem inflammatory syndrome in children (MIS-C) regardless of the presence of symptoms. | See <https://github.com/PEDSnet/PASC/tree/main/observation_derivation_recover_ml_phenotype/specs> for detailed codes. |
| Outcomes |  |  |  |  |
| Mental health disorders | Indicator | Yes/No | We developed Systematized Nomenclature of Medicine (SNOMED) cluster of codes, which served as outcomes. We coded 4,047 SNOMED codes into 49 clusters and 15 categories. These long-COVID-compatible diagnoses were categorized based on previously identified clusters of codes associated with post-acute manifestations of COVID-19 in earlier research. | See <https://github.com/yiwenluiris/PASC_Mental_Health_Public/blob/main/mhcc_codes_0627v4_v4.csv> for detailed codes. |
| Confounding variables |
| Age (years) | Linear | NA | Based on records in the person domain. | Age is defined as the integer of (date – birth date)/365.25 |
| Sex | Indicator | Male/Female | Based on records in the person domain. | NA |
| Race/Ethnicity | 4 categories | Non-Hispanic White  Non-Hispanic Black  Hispanic  Other/unknown | Based on records in the person domain. | NA |
| Site | 25 categories | 25 different sites (hospitals) | Based on records in the person domain | NA |
| Obesity | Indicator | Yes/No | Based on records in the measurement domain.  If measured at age < 24*30.5 days, NHANES weight z score > 1.64  If measured at 24*30.5 < age <240*30.5, NHANES BMI z score > 1.64  If measured at age >= 240*30.5, BMI kg/m2 > 30 | NA |
| PMCA (Pediatric Medical Complexity Algorithm) | 3 categories | No chronic condition (PMCA = 0)  Non-complex chronic condition (PMCA = 1)  Complex chronic condition comorbidities (PMCA = 2) | Based on the condition occurrence and visit occurrence domains. | Simon, T. D., Haaland, W., Hawley, K., Lambka, K., & Mangione-Smith, R. (2018). Development and validation of the Pediatric Medical Complexity Algorithm (PMCA) version 3.0. *Academic pediatrics*, *18*(5), 577-580. |
| Number of visits to emergency department in 18 months to 7 days prior to the entry | 3 categories | 0  1  >=2 | Based on the condition occurrence and visit occurrence domains. | NA |
| Number of inpatient visits in 18 months to 7 days prior to the entry | 3 categories | 0  1  >=2 | Based on the condition occurrence and visit occurrence domains, including Inpatient Hospital Stay, Emergency Department Admit to Inpatient Hospital Stay, and Observation Stay | NA |
| Number of outpatient visits in 18 months to 7 days prior to the entry | 3 categories | 0  1  >=2 | Based on the condition occurrence and visit occurrence domains including Ambulatory/Outpatient Visit (With a Physician) and Interactive Telemedicine Service | NA |
| Number of COVID-19 negative tests prior to the entry | 3 categories | 0  1  >=2 | Based on the condition occurrence and visit occurrence domains. | NA |
| Variables for sensitivity analysis |  |  |  |  |
| Mild COVID-19 | Indicator | Yes/No | Based on the condition occurrence domain. | Forrest, C. B., Burrows, E. K., Mejias, A., Razzaghi, H., Christakis, D., Jhaveri, R., Lee, G. M., Pajor, N. M., Rao, S., Thacker, D., & Bailey, L. C. (2022). Severity of Acute COVID-19 in Children &amp;lt;18 Years Old March 2020 to December 2021. *Pediatrics*, *149*(4). <https://doi.org/10.1542/peds.2021-055765>  Code sets are available through https://github.com/PEDSnet/COVID19_Severity/tree/main. |
| Moderate or severe COVID-19 | Indicator | Yes/No | Based on the condition occurrence, procedure occurrence, drug, device and death domains. | Forrest, C. B., Burrows, E. K., Mejias, A., Razzaghi, H., Christakis, D., Jhaveri, R., Lee, G. M., Pajor, N. M., Rao, S., Thacker, D., & Bailey, L. C. (2022). Severity of Acute COVID-19 in Children &amp;lt;18 Years Old March 2020 to December 2021. *Pediatrics*, *149*(4). <https://doi.org/10.1542/peds.2021-055765>  Code sets are available through https://github.com/PEDSnet/COVID19_Severity/tree/main. |
| ICU admission with COVID-19 | Indicator | Yes/No | Based on the adt_occurrence domain | NICU, CICU, PICU |

Note: All of the domains in the table above are based on the PEDSnet common data model (CDM). More details are available through this link: <https://data-models-service.research.chop.edu>.

## The definition of “increase” in the manuscript

**Supp Figure 1.** Illustration of the distinction between "new-onset" and "increase" as used in the manuscript. **Supp Figure 1(A)** provides an example scenario where, prior to the index date, four individuals have a specific neuropsychiatric or related condition (Group P1), while six individuals do not have the condition (Group N1). After the index date, four of the six individuals in Group N1 develop the condition and are moved to Group P2 (those with the condition after the index date), while three of the four individuals in Group P1 no longer have the condition and are moved to Group N2 (those without the condition after the index date). **Supp Figure 1(B)** illustrates that the four individuals moving from Group N1 to Group P2 are classified as "new-onset" cases. **Supp Figure 1(C)** demonstrates how the "increase" is calculated in the paper. Since there were four individuals in Group P1 before the index date and five individuals in Group P2 after the index date, the difference (one individual) is counted as the "increase."


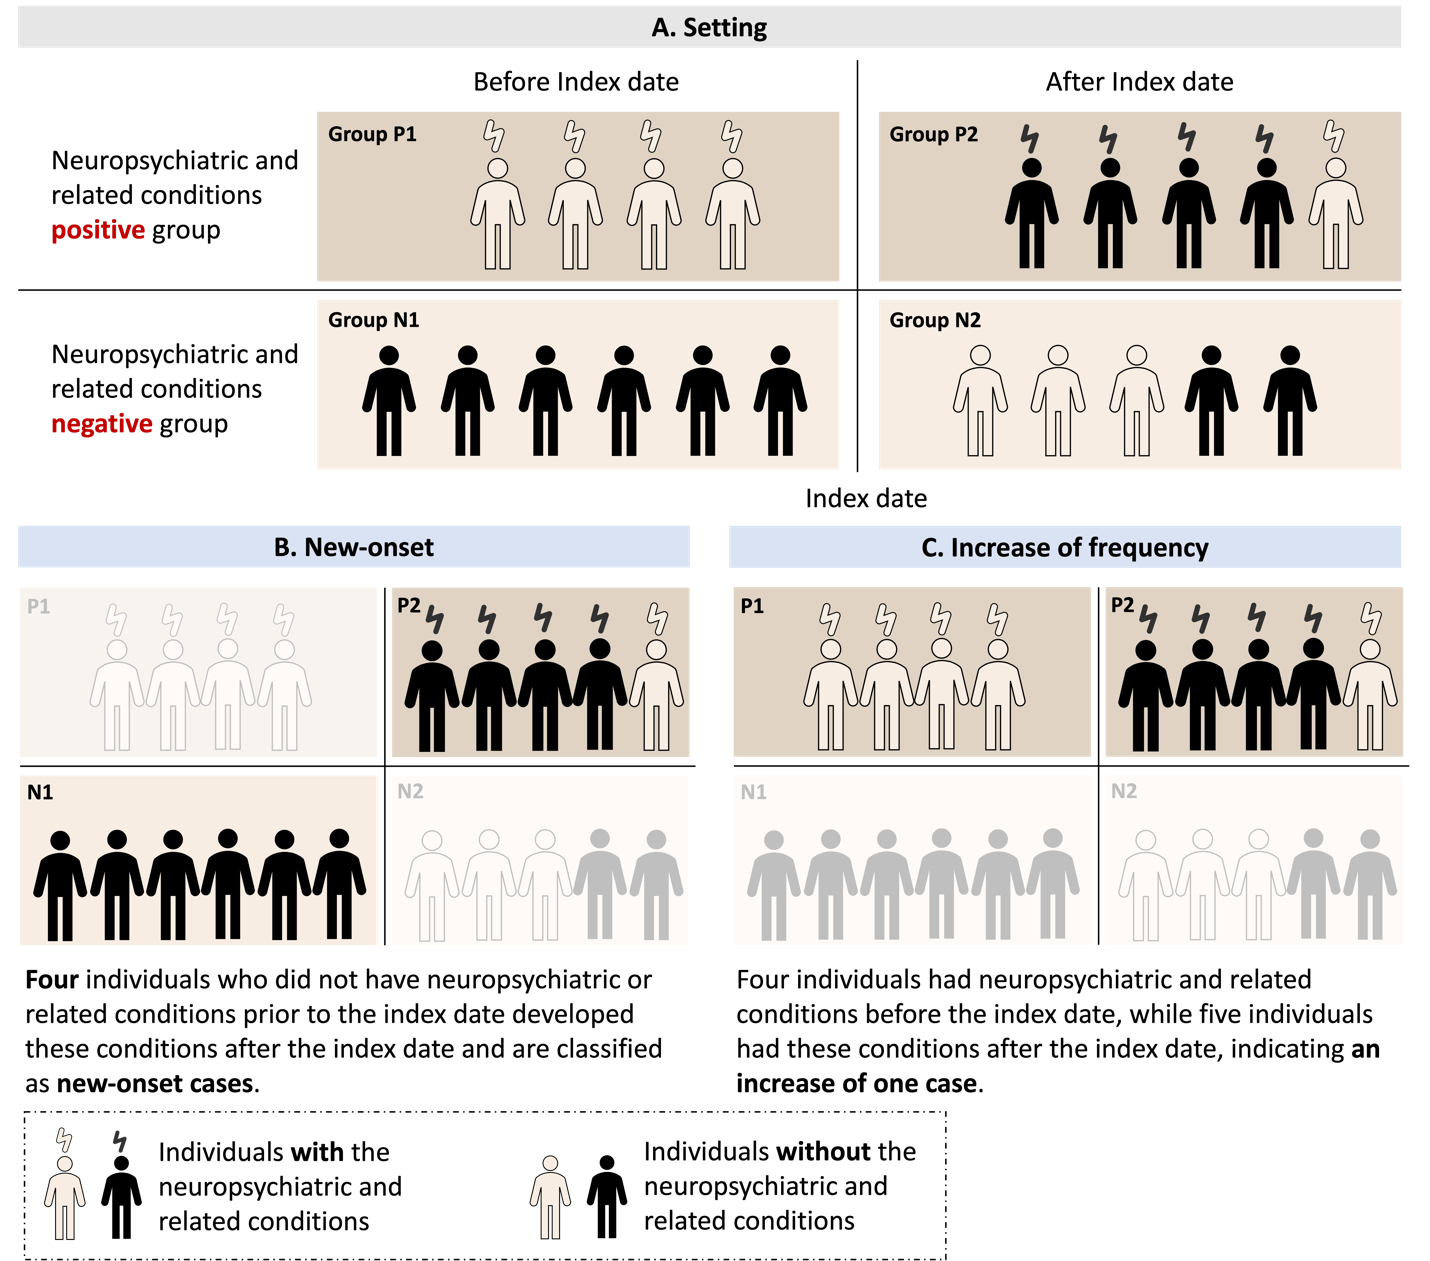


## Statistical analysis plan

**Aims**

Estimate the effects of COVID-19 illness on risk of neuropsychiatric and related outcomes in children and youths.

- Examine the outcome in multiple ways:
  - Any neuropsychiatric and related outcomes.
  - By categories, which are aggregations of clusters.
  - By clusters, which are aggregations of diagnosis codes.

**Design for primary analysis**

Retrospective Cohort Study Design:

Age [5, 20.99] during 2020-03-01 ~ latest data (latest date: 2023-03-16 - 6 months)

Stratified analysis:

- Children: Age [5,11.99]
- Youths: Age [12,20.99]

Follow-up time: maximum of 6-month follow-up

- 28 - 179 days follow-up post-acute phase

Inclusion criteria:

- For COVID-19 group:
  - First covid-19 positive test during study period
  - Had at least one visit 28 - 179 days after the index date
  - Had at least one visit 24 months - 7 days prior to the index date
  - Satisfy the age constraint
- For contemporary control group:
  - Not part of COVID-19 group
  - At least a negative test of COVID-19 during 2020-03-01~2023-03-16 – 6 months: PCR/antigen/serology
    - Index date: a randomly selected negative test date based on the empirical distribution of index dates in the COVID-19 cohort
  - Had at least one visit 28 - 179 days after the index date
  - Had at least one visit 24 months - 7 days prior to the index date
  - Satisfy the age constraint
- For all groups, remove:
  - Participants with prior history of neuropsychiatric and related conditions (the outcome symptoms) 24 months to 7 days prior to the index date
  - Participants with sex unknown.

# Section 3 Supplemental Detailed Results

**Supp Table 2.** Estimated risk difference in mental health conditions between the COVID-19 positive cohort and the COVID-19 negative cohort for children and youths.

| **Symptoms** | **Children [95%CI]** | **Youths [95%CI]** |
| --- | --- | --- |
| **Any Neuropsychiatric and related conditions** | 0.96% [0.75%, 1.16%] | 0.84% [0.53%, 1.15%] |
| **Adverse Childhood Experiences** | 0.01% [-0.02%, 0.03%] | 0.06% [0.02%, 0.11%] |
| Emotional Abuse | -0.01% [-0.01%, 0.00%] | 0.01% [0.00%, 0.03%] |
| Neglect | 0.01% [0.00%, 0.02%] | 0.00% [-0.01%, 0.01%] |
| Physical Abuse | -0.01% [-0.03%, 0.02%] | 0.03% [0.00%, 0.06%] |
| Sexual Abuse | 0.01% [-0.01%, 0.02%] | 0.03% [0.00%, 0.05%] |
| **Anxiety Disorders** | 0.33% [0.24%, 0.43%] | 0.27% [0.03%, 0.51%] |
| Anxiety Disorder | 0.26% [0.19%, 0.33%] | 0.26% [0.05%, 0.48%] |
| OCD | 0.02% [0.00%, 0.04%] | 0.02% [-0.03%, 0.08%] |
| Somatoform Disorder | 0.03% [0.00%, 0.05%] | -0.04% [-0.10%, 0.02%] |
| Stress Disorder | 0.08% [0.02%, 0.14%] | 0.08% [-0.06%, 0.22%] |
| **Disruptive Behavior Disorders** | 0.04% [-0.01%, 0.09%] | 0.01% [-0.07%, 0.08%] |
| Conduct Disorder | 0.02% [-0.02%, 0.06%] | -0.02% [-0.06%, 0.02%] |
| Impulse Control Disorder | 0.00% [-0.03%, 0.03%] | -0.01% [-0.06%, 0.05%] |
| Oppositional Defiant Disorder | 0.02% [0.00%, 0.05%] | 0.03% [-0.02%, 0.08%] |
| **Eating and Feeding Disorders** | 0.08% [0.04%, 0.13%] | -0.06% [-0.14%, 0.03%] |
| Avoidant/Restrictive Food Intake | 0.07% [0.03%, 0.11%] | -0.07% [-0.15%, 0.02%] |
| Other Eating and Feeding Disorder | 0.01% [-0.01%, 0.04%] | 0.01% [-0.01%, 0.03%] |
| **Elimination Disorders** | 0.02% [-0.03%, 0.06%] | 0.03% [-0.01%, 0.07%] |
| Encopresis | 0.00% [-0.02%, 0.02%] | 0.01% [0.00%, 0.03%] |
| Enuresis | 0.02% [-0.02%, 0.06%] | 0.02% [-0.02%, 0.06%] |
| **Gender Dysphoria/Sexual Dysfunction** | 0.00% [-0.01%, 0.01%] | -0.03% [-0.08%, 0.02%] |
| Gender Dysphoria | 0.00% [-0.01%, 0.01%] | -0.03% [-0.08%, 0.02%] |
| Paraphilia | 0.00% [0.00%, 0.00%] | 0.00% [-0.01%, 0.00%] |
| Sexual Dysfunction | 0.00% [0.00%, 0.00%] | 0.00% [-0.01%, 0.01%] |
| **Intentional Self-Harm/Suicidality** | 0.02% [0.00%, 0.05%] | 0.11% [0.02%, 0.20%] |
| Parasuicidality | 0.01% [-0.01%, 0.02%] | 0.02% [-0.02%, 0.07%] |
| Suicidality | 0.02% [0.00%, 0.03%] | 0.11% [0.02%, 0.19%] |
| **Mood Disorders** | 0.02% [-0.02%, 0.05%] | 0.05% [-0.15%, 0.25%] |
| Bipolar Disorder | 0.01% [0.00%, 0.02%] | -0.02% [-0.05%, 0.02%] |
| Major Depression | 0.00% [-0.02%, 0.02%] | -0.14% [-0.29%, 0.02%] |
| Minor Depression | 0.01% [-0.02%, 0.04%] | 0.21% [0.05%, 0.37%] |
| **Neurocognitive Disorders** | 0.05% [0.02%, 0.07%] | 0.10% [0.04%, 0.15%] |
| Catatonia | 0.00% [0.00%, 0.00%] | 0.00% [-0.01%, 0.02%] |
| Delirium | 0.04% [0.02%, 0.06%] | 0.08% [0.03%, 0.14%] |
| Encephalopathy | 0.00% [-0.01%, 0.02%] | 0.02% [0.00%, 0.04%] |
| **Neurodevelopmental Disorders** | 0.59% [0.41%, 0.76%] | 0.47% [0.27%, 0.67%] |
| Academic Developmental Disorder | 0.02% [-0.02%, 0.06%] | 0.05% [0.00%, 0.11%] |
| ADHD | 0.11% [0.02%, 0.21%] | 0.33% [0.16%, 0.50%] |
| Autism Spectrum Disorder | 0.10% [0.02%, 0.18%] | 0.06% [-0.03%, 0.15%] |
| Communication/Motor Disorder | 0.38% [0.25%, 0.52%] | 0.06% [0.00%, 0.12%] |
| Intellectual Disability | 0.12% [0.05%, 0.20%] | 0.09% [0.01%, 0.17%] |
| **Personality Disorders** | 0.00% [-0.01%, 0.01%] | -0.02% [-0.06%, 0.01%] |
| Personality Disorder | 0.00% [-0.01%, 0.01%] | -0.02% [-0.06%, 0.01%] |
| **Psychotic Disorders** | 0.01% [0.00%, 0.02%] | -0.03% [-0.07%, 0.01%] |
| Psychotic Disorder | 0.01% [0.00%, 0.01%] | -0.01% [-0.04%, 0.02%] |
| Schizoaffective Disorder | 0.00% [0.00%, 0.00%] | 0.00% [-0.02%, 0.01%] |
| Schizophrenia | 0.00% [0.00%, 0.00%] | -0.02% [-0.04%, 0.01%] |
| **Sleep-Wake Disorders** | 0.05% [0.00%, 0.09%] | 0.16% [0.07%, 0.24%] |
| Hypersomnia | 0.00% [-0.01%, 0.01%] | 0.01% [-0.02%, 0.04%] |
| Insomnia | 0.02% [-0.01%, 0.06%] | 0.13% [0.06%, 0.21%] |
| Parasomnias | 0.03% [0.00%, 0.06%] | 0.03% [0.00%, 0.06%] |
| **Standalone Symptoms** | 0.07% [0.01%, 0.13%] | 0.17% [0.08%, 0.26%] |
| Anger/Aggression | 0.03% [0.00%, 0.06%] | 0.01% [-0.03%, 0.06%] |
| Anxiety Symptoms | 0.03% [-0.02%, 0.07%] | 0.05% [0.00%, 0.10%] |
| Attention Symptoms | 0.01% [-0.02%, 0.04%] | 0.08% [0.03%, 0.14%] |
| Depressive Symptoms | 0.00% [-0.01%, 0.02%] | 0.02% [0.00%, 0.04%] |
| Hallucinations | 0.00% [-0.01%, 0.01%] | 0.01% [-0.02%, 0.04%] |
| **Substance Use and Dependence** | 0.01% [0.00%, 0.03%] | 0.00% [-0.07%, 0.08%] |
| Alcohol | 0.00% [0.00%, 0.00%] | -0.01% [-0.03%, 0.02%] |
| Opioid Related | 0.01% [0.00%, 0.02%] | 0.00% [-0.02%, 0.02%] |
| Other Substances | 0.01% [0.00%, 0.02%] | -0.01% [-0.04%, 0.02%] |
| THC | 0.00% [0.00%, 0.00%] | -0.01% [-0.06%, 0.03%] |
| Tobacco | 0.00% [0.00%, 0.00%] | 0.00% [-0.05%, 0.06%] |
| **Tic Disorders** | 0.05% [0.02%, 0.08%] | 0.02% [-0.03%, 0.06%] |
| Tic Disorder | 0.05% [0.02%, 0.08%] | 0.02% [-0.03%, 0.06%] |

# Section 4 Supplemental Results: patient characteristic balance between groups in primary analysis

## A. Propensity-score (PS) models and matching

We built large-scale PS model for both children and youths cohorts with baseline patient characteristics including

- Demographics (age at index date; race/ethnicity; gender)
- Obesity
- Chronic condition indicator as defined by the Pediatric Medical Complexity Algorithm (PMCA)
  - No chronic condition (PMCA = 0)
  - Non-complex chronic condition (PMCA = 1)
  - Complex chronic condition comorbidities (PMCA = 2)
- Healthcare utilization 24 months ~ 7 days prior to index date categorized to 0,1,2,>=3
  - Number of outpatient visits
  - Number of inpatient visits
  - Number of ED visits
  - Number of unique medications/prescriptions
  - Number of COVID tests
- Cohort entry date (index date) categorized to 1 month
- Hospital index
- Existence of a list of 205 chronic conditions 24 months ~ 7 days prior to index

We exclude all covariates that occur in fewer than 0.1% of participants in the cohort for computational efficiency.

## B. Empirical equipoise assessment

To evaluate the comparability between the study groups, we present the preference score, which offers an intuitive interpretation by transforming the propensity score to incorporate the prevalence of treatment. Specifically, the preference score (F) is linked to the propensity score (S) and the prevalence of treatment (P) through the equation: ln(F/(1-F)) = ln(S/(1-S)) - ln(P/(1-P))1,2. Supp Figure 2, 3 below shows the distribution of preference scores across two treatment groups in each study cohort, which indicates high comparability of these studies.

**Supp Figure 2.** Preference score distributions for COVID-19 positive and negative groups in children. A greater convergence of these distributions indicates a higher similarity in the predicted likelihood of being infected between the COVID-19 positive (red) and negative (blue) participants.

**
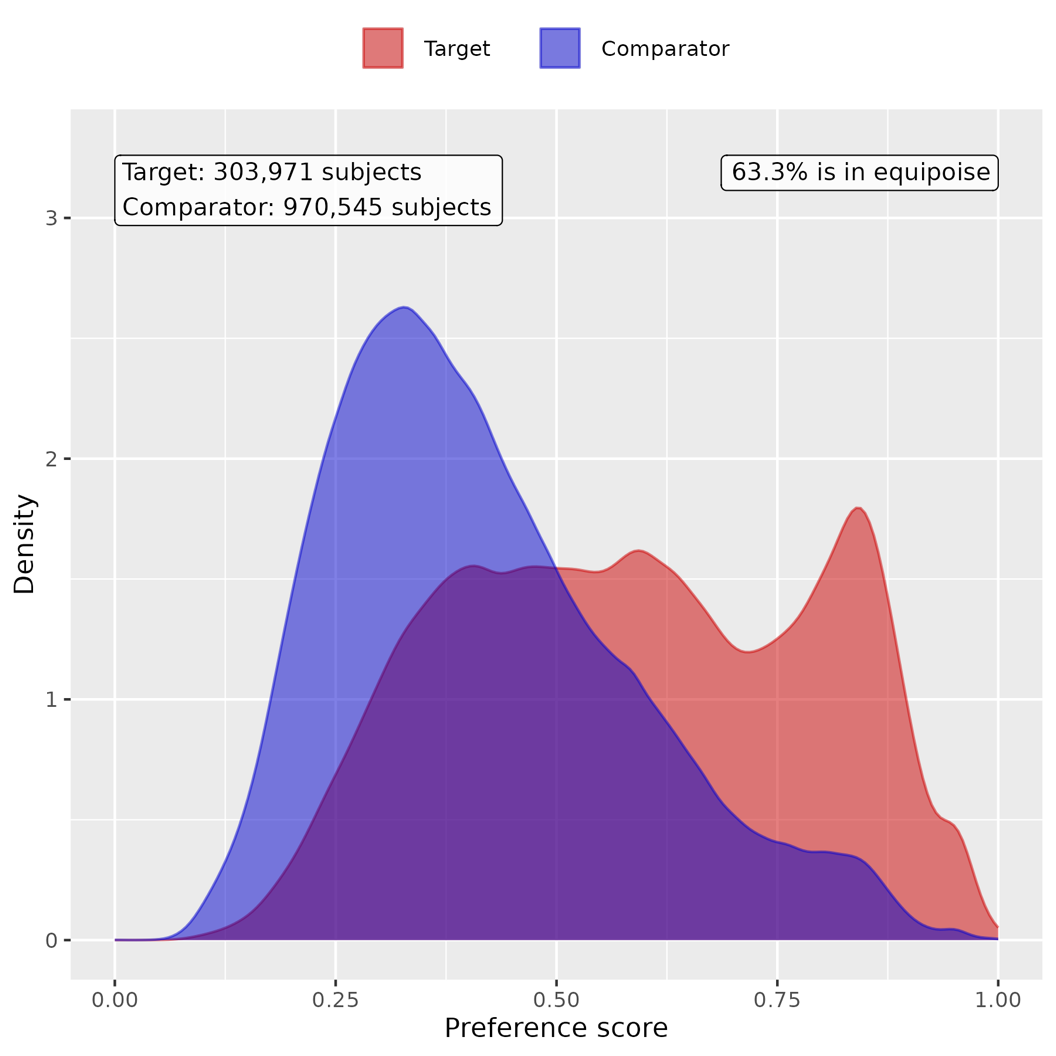
**

**Supp Figure 3.** Preference score distributions for COVID-19 positive and negative groups in youths.A greater convergence of these distributions indicates a higher similarity in the predicted likelihood of being infected between the COVID-19 positive (red) and negative (blue) participants.


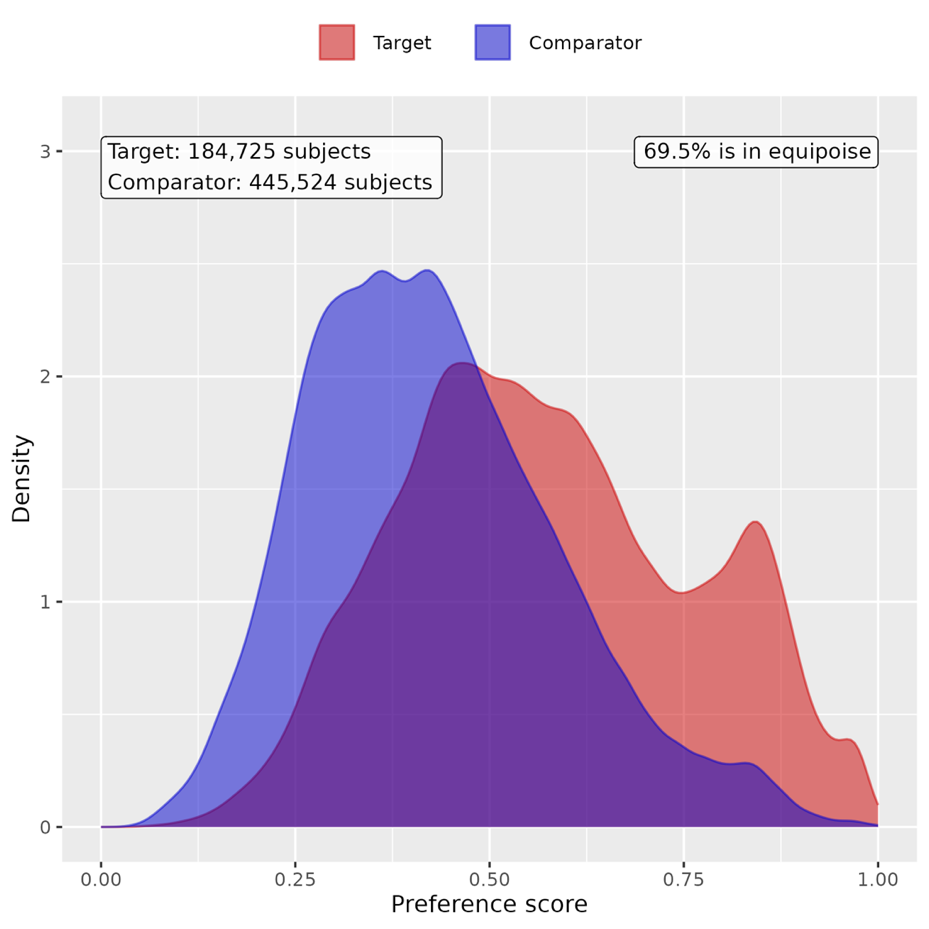


## C. Patient characteristic balance in the primary analysis

We evaluate the balance of patient characteristics using the standardized difference of means (SMD). Supp Figure 4, 5 presents the SMD of three cohorts before and after PS score matching.

**Supp Figure 4.** Patient characteristic balance before and after large-scale PS matching with ratio 1:2 in children.The upper panel displays the top 20 covariates with the largest standardized difference of means before matching, while the lower panel displays the top 20 covariates with the largest standardized difference of means after matching.

**
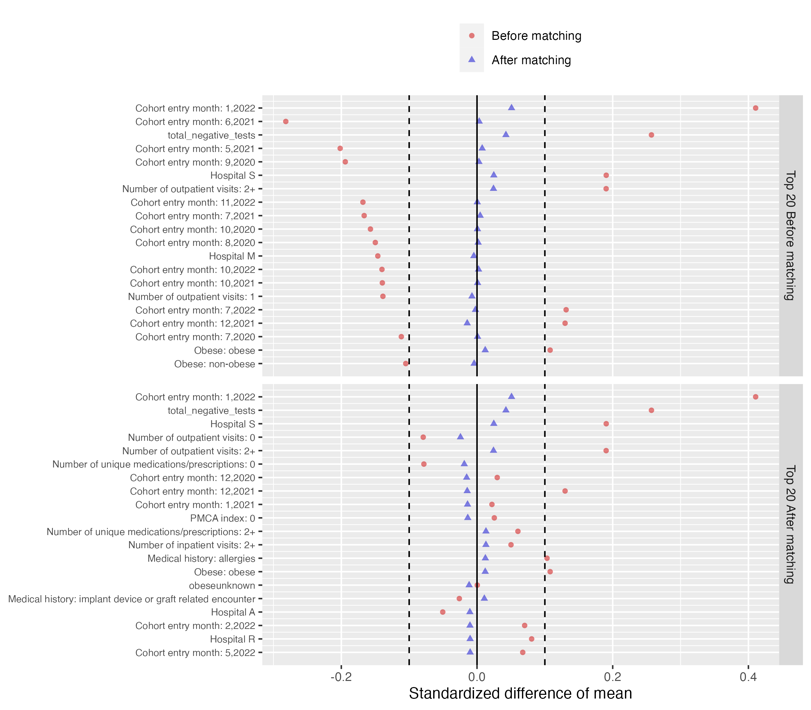
**

**Supp Figure 5.** Patient characteristic balance before and after large-scale PS matching with ratio 1:2 in youths.The upper panel displays the top 20 covariates with the largest standardized difference of means before matching, while the lower panel displays the top 20 covariates with the largest standardized difference of means after matching.

**
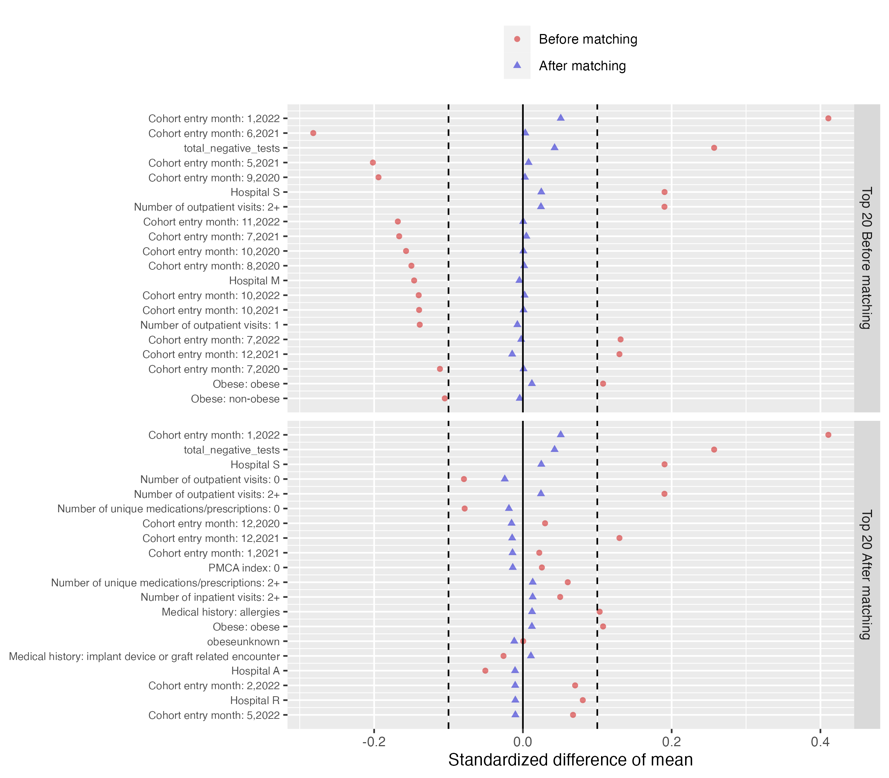
**

# Section 5 Supplemental Results: analysis for overall cohort without age stratification

We conducted sensitivity analyses to investigate risk of mental health conditions for overall cohort without age stratification. We performed the same PS matching procedure and difference-in-difference method to estimate the risk difference.

## Empirical equipoise assessment

**Supp Figure 6.** Preference score distributions of COVID-19 positive and negative groups in the overall cohort without age stratification.A greater convergence of these distributions indicates a higher similarity in the predicted likelihood of being infected between the COVID-19 positive (red) and negative (blue) participants.


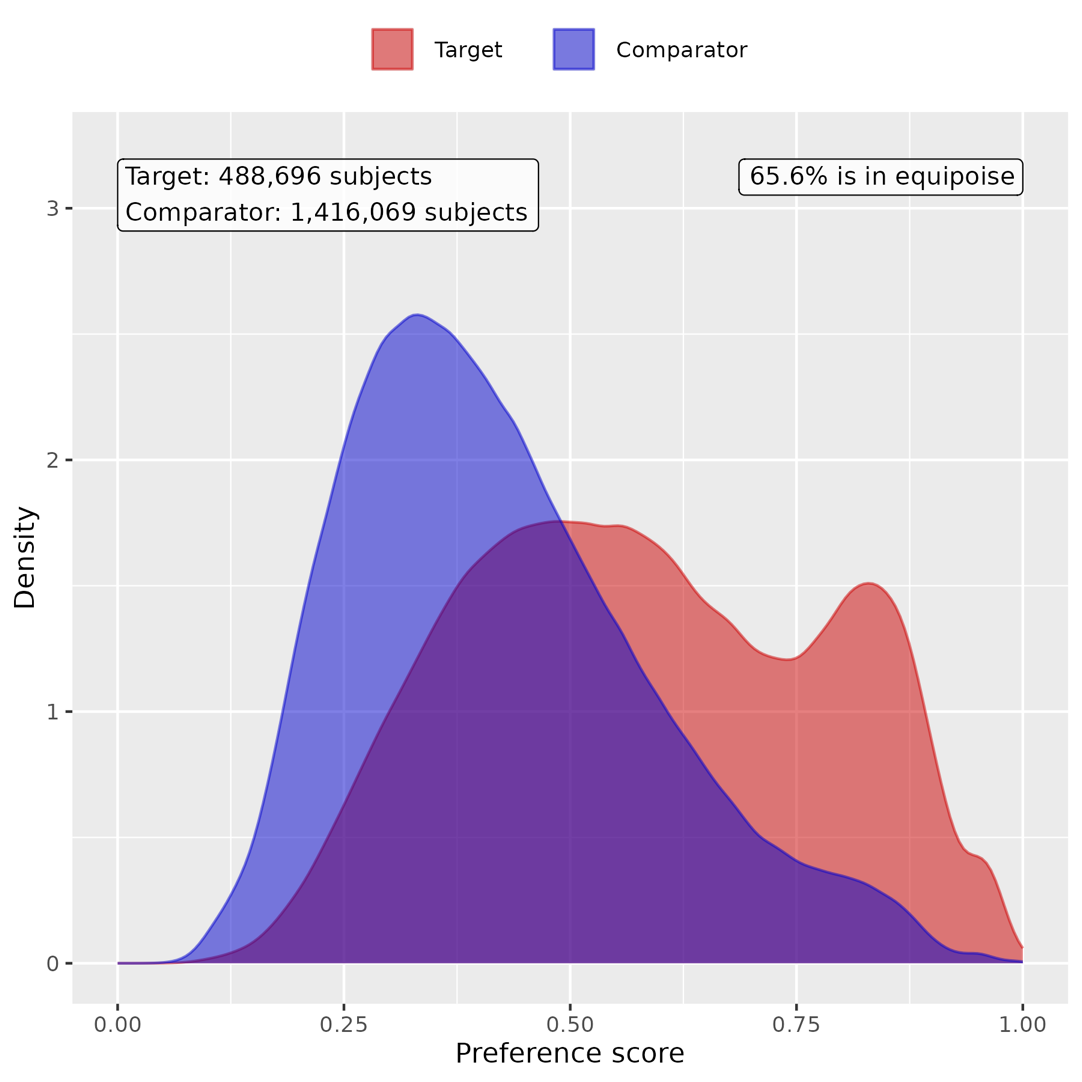


## B. Patient characteristic balance

**Supp Figure 7.** Patient characteristic balance before and after large-scale PS matching with ratio 1:2 in the overall cohort without age stratification. The upper panel displays the top 20 covariates with the largest standardized difference of means before matching, while the lower panel displays the top 20 covariates with the largest standardized difference of means after matching.


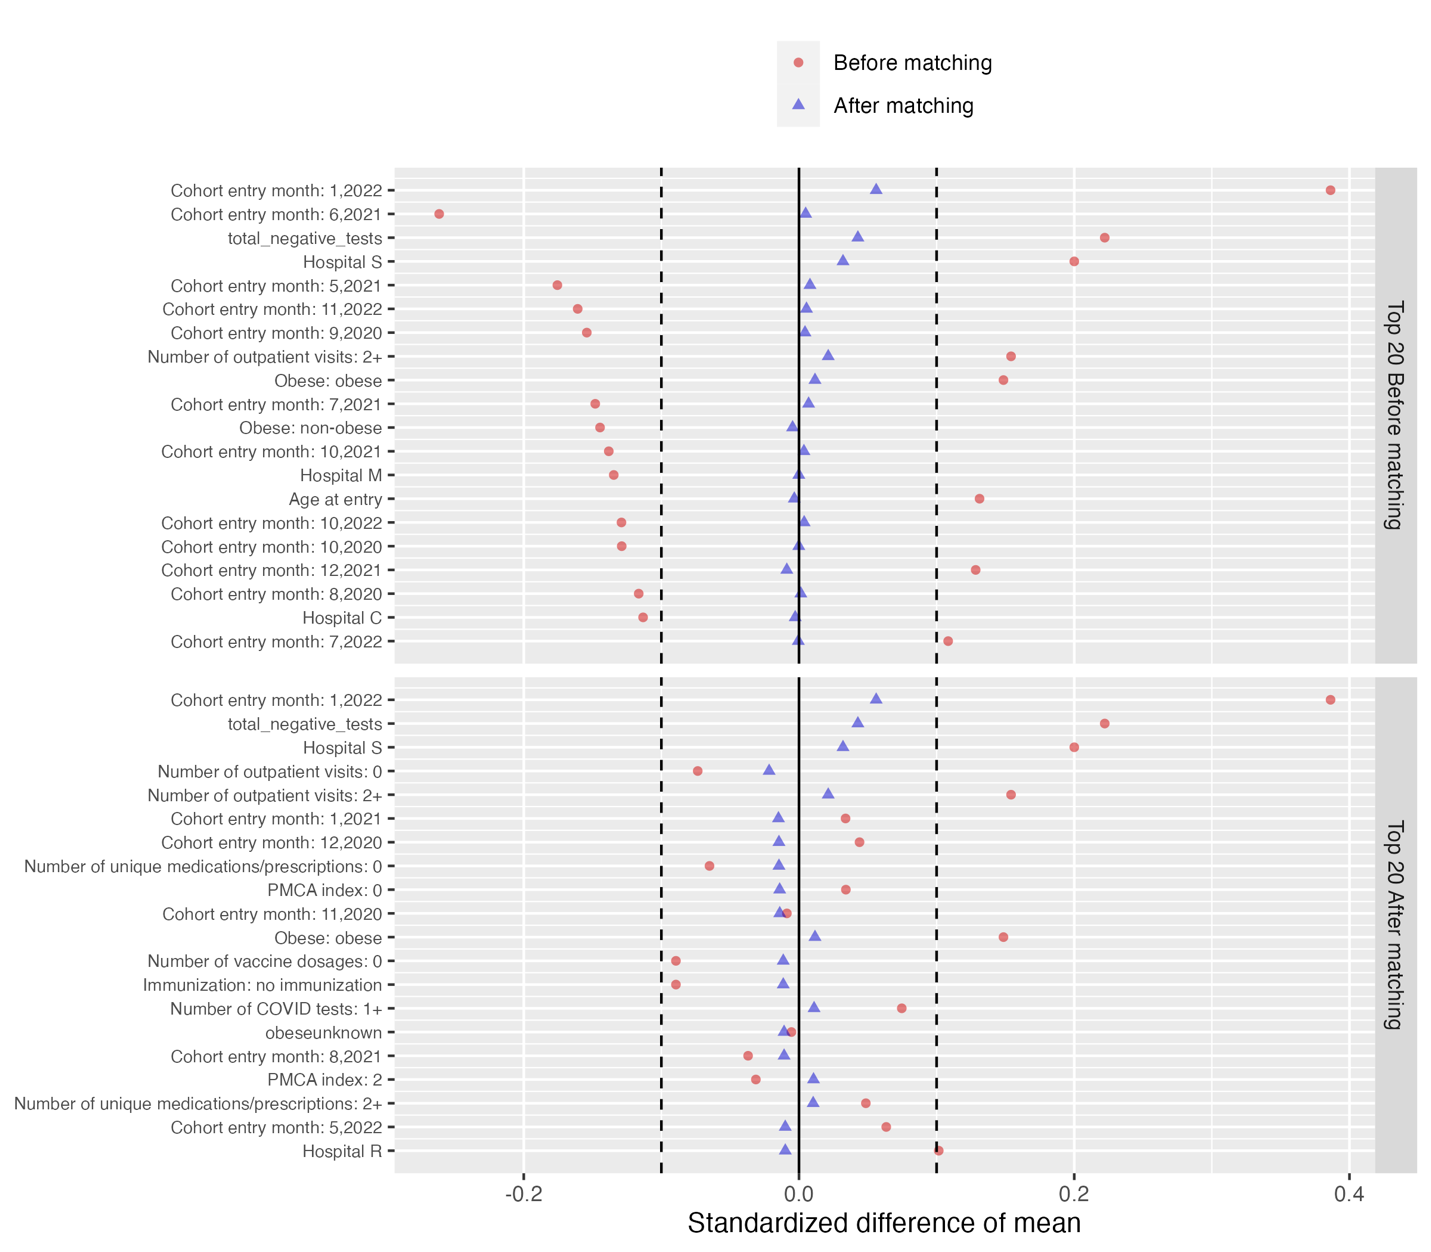


## C. Risk difference of COVID-19 positive group compared to COVID-19 negative group

**Supp Figure 8.** Estimated risk difference of having at least one condition, at category level, and at cluster level between the COVID-19 positive cohort and the COVID-19 negative group for the overall cohort without age stratification.


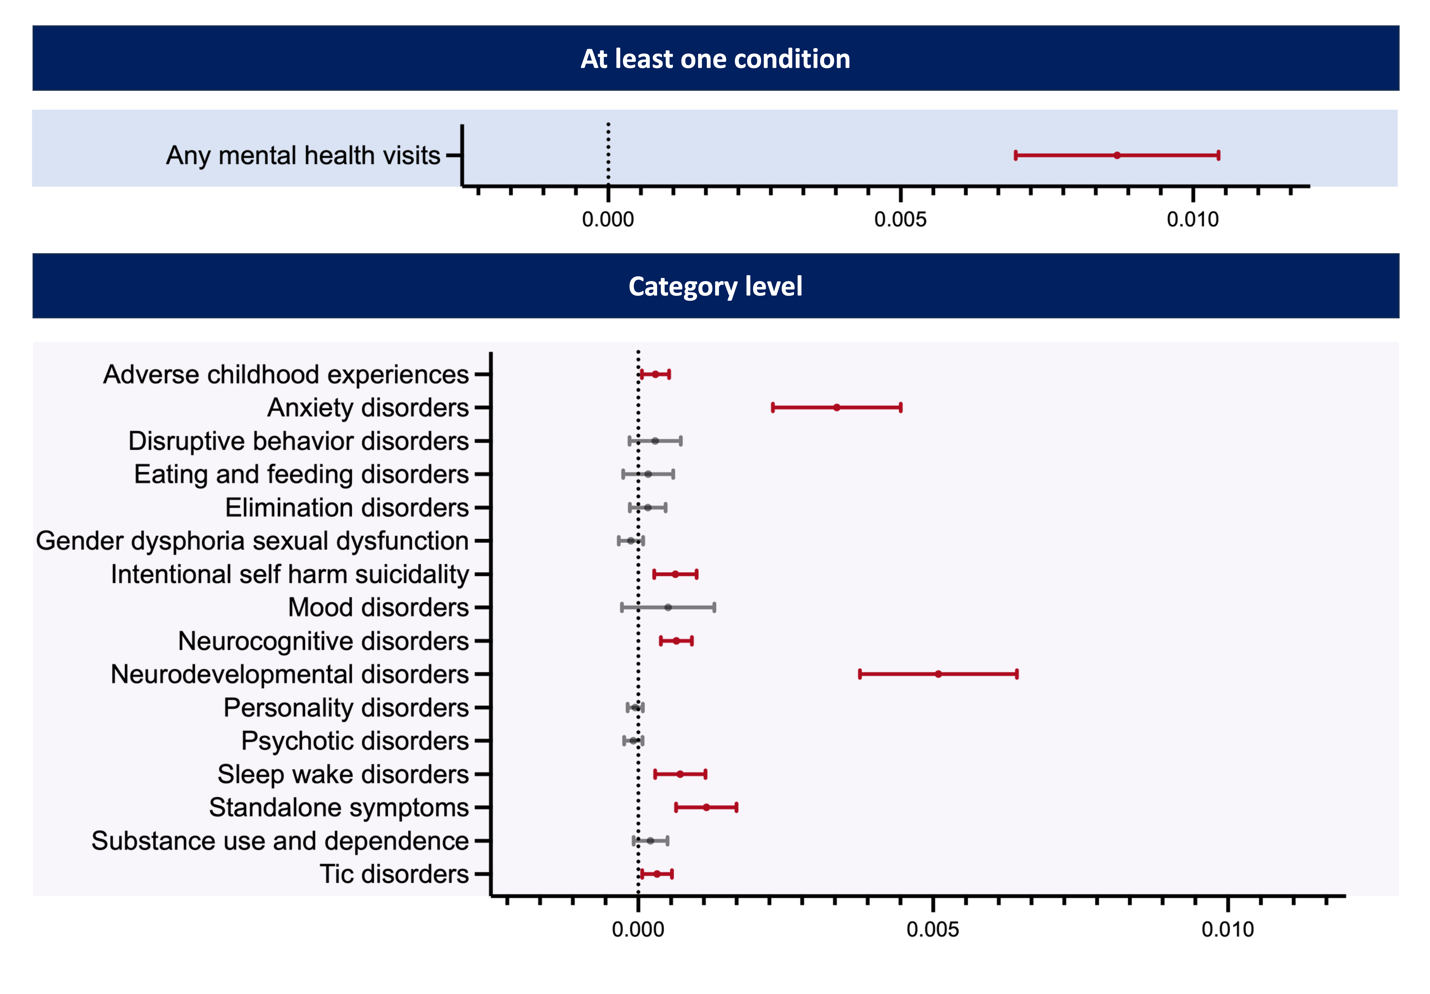


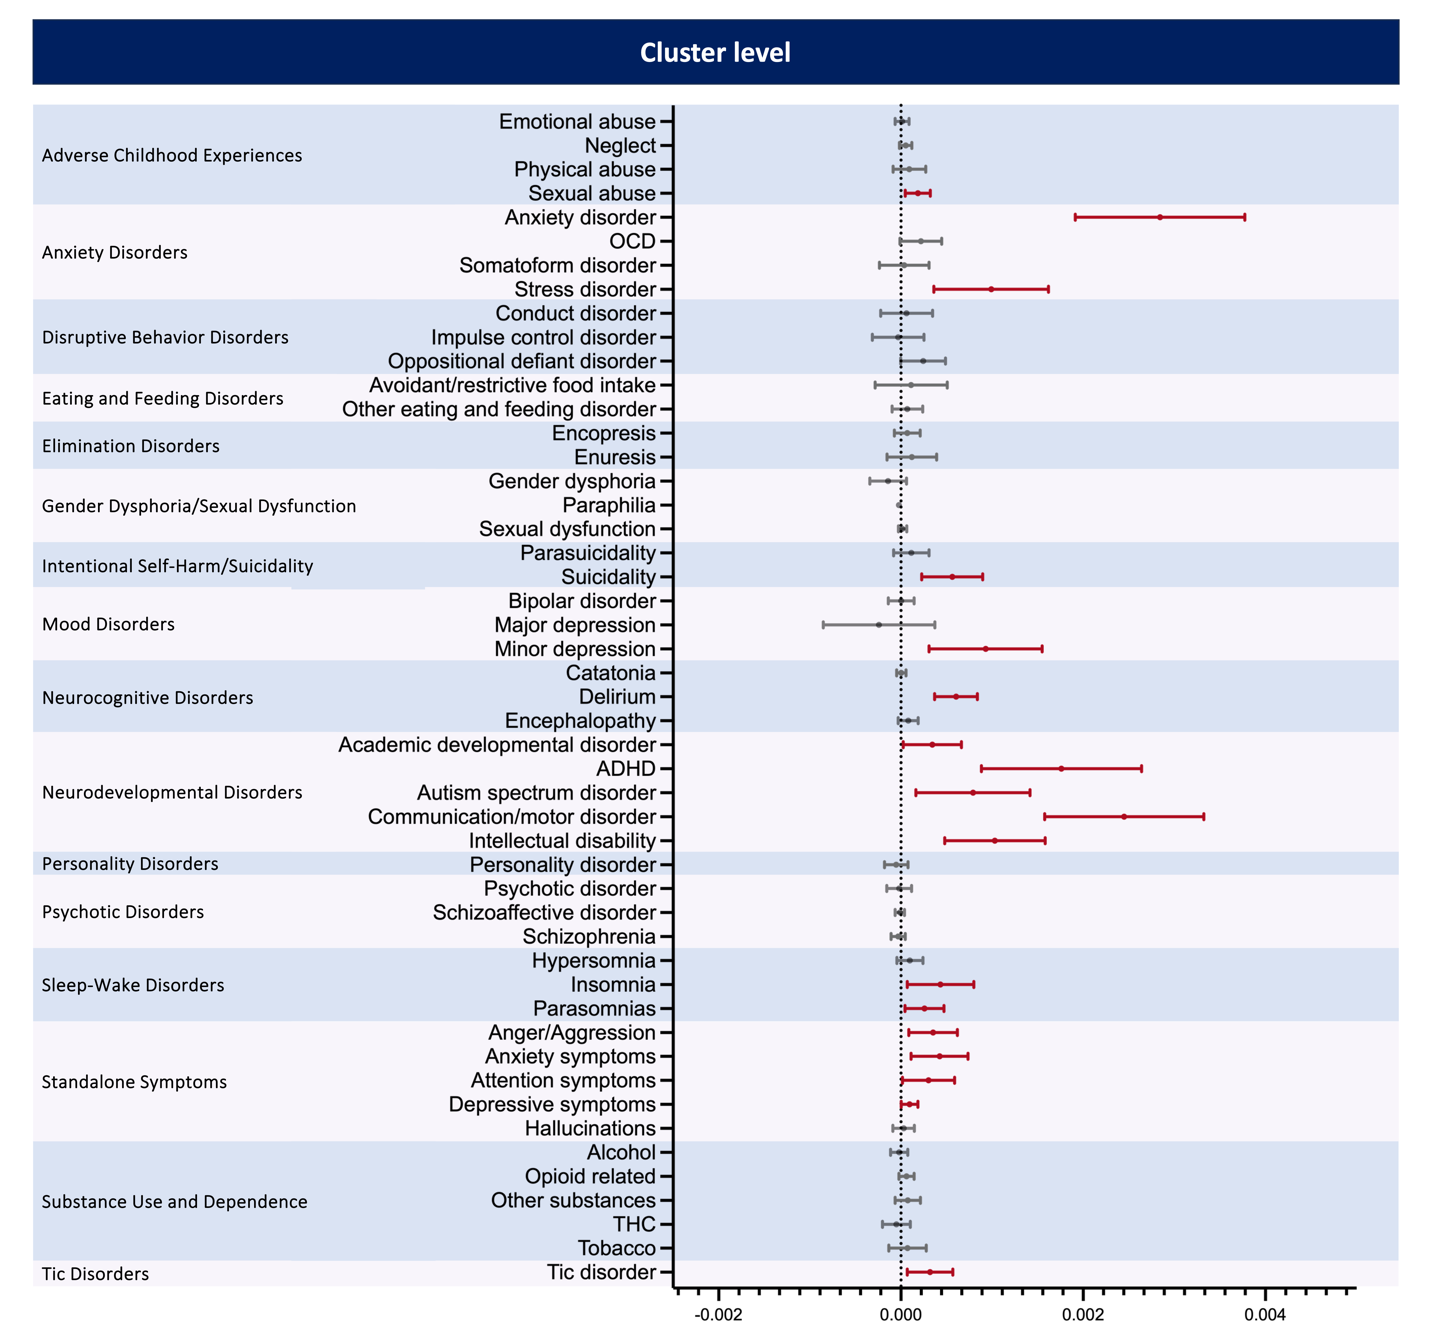


# Section 6 Supplemental Results: sensitivity analysis with COVID-19/respiratory negative group

We conducted sensitivity analyses to examine whether the risk of mental health conditions is elevated in the COVID-19 positive group compared to a control group that is both COVID-19 negative and has never been infected with any non-COVID respiratory conditions, including influenza, parainfluenza, rhinovirus, and respiratory syncytial virus (RSV) infection. Below, we present the attrition table for the COVID-19 positive group, COVID-19 negative group, and the combined COVID-19/respiratory negative group.

**Supp Figure 9.** Attrition table of the COVID-19 positive group, COVID-19 negative group, and COVID-19/respiratory negative group


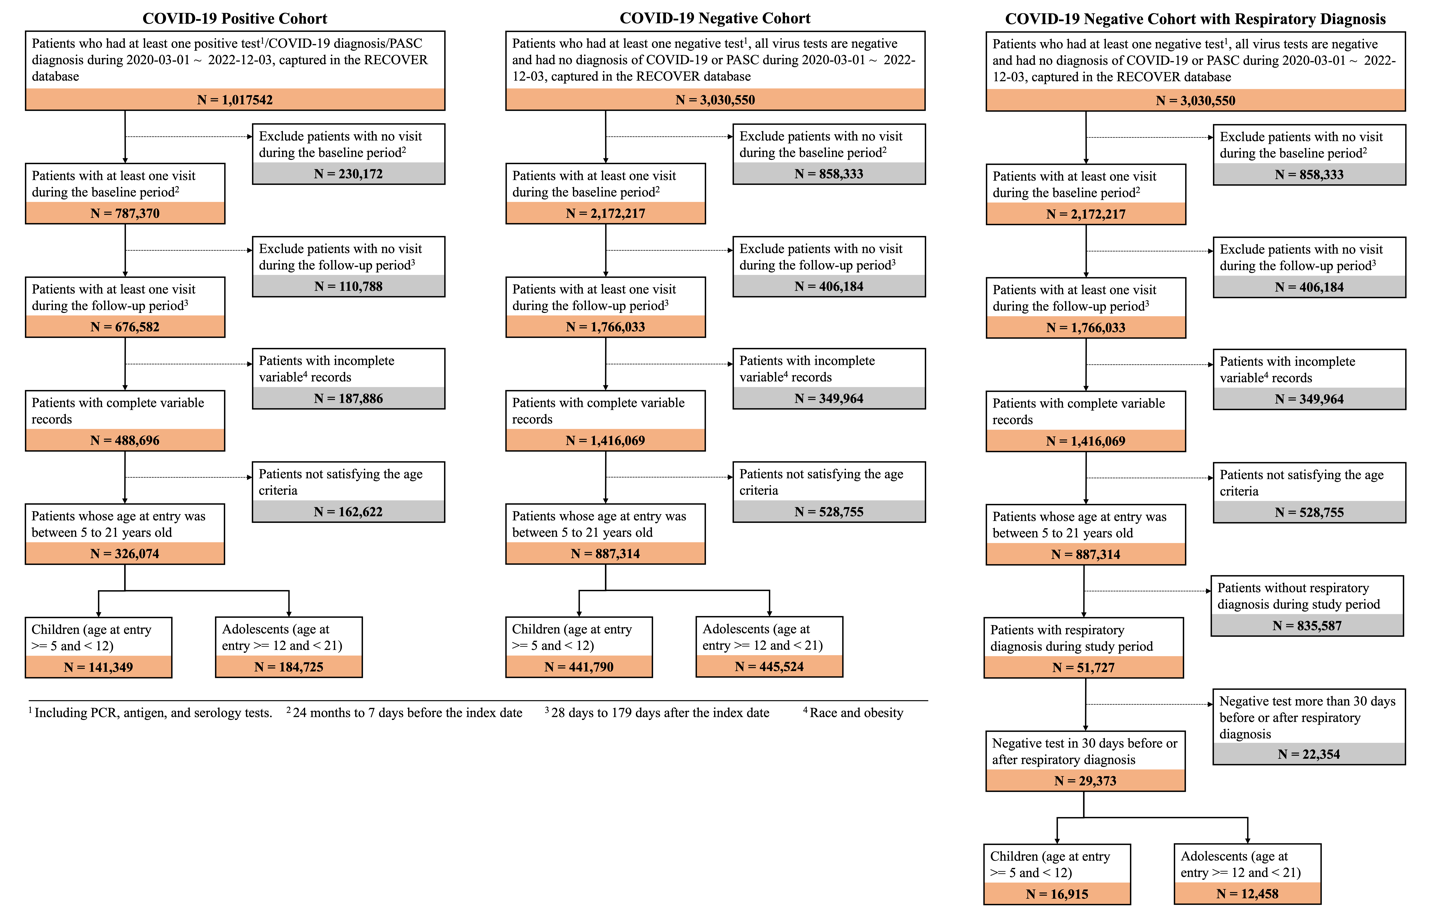


Here we also report the equipoise plots and standard mean difference plots between COVID-19 positive group and COVID-19/respiratory negative group for both children and youths.

**Supp Figure 10.** Preference score distributions of COVID-19 positive group and COVID-19/respiratory negative group in children.A greater convergence of these distributions indicates a higher similarity in the predicted likelihood of being infected between the COVID-19 positive (red) and negative (blue) participants.

**
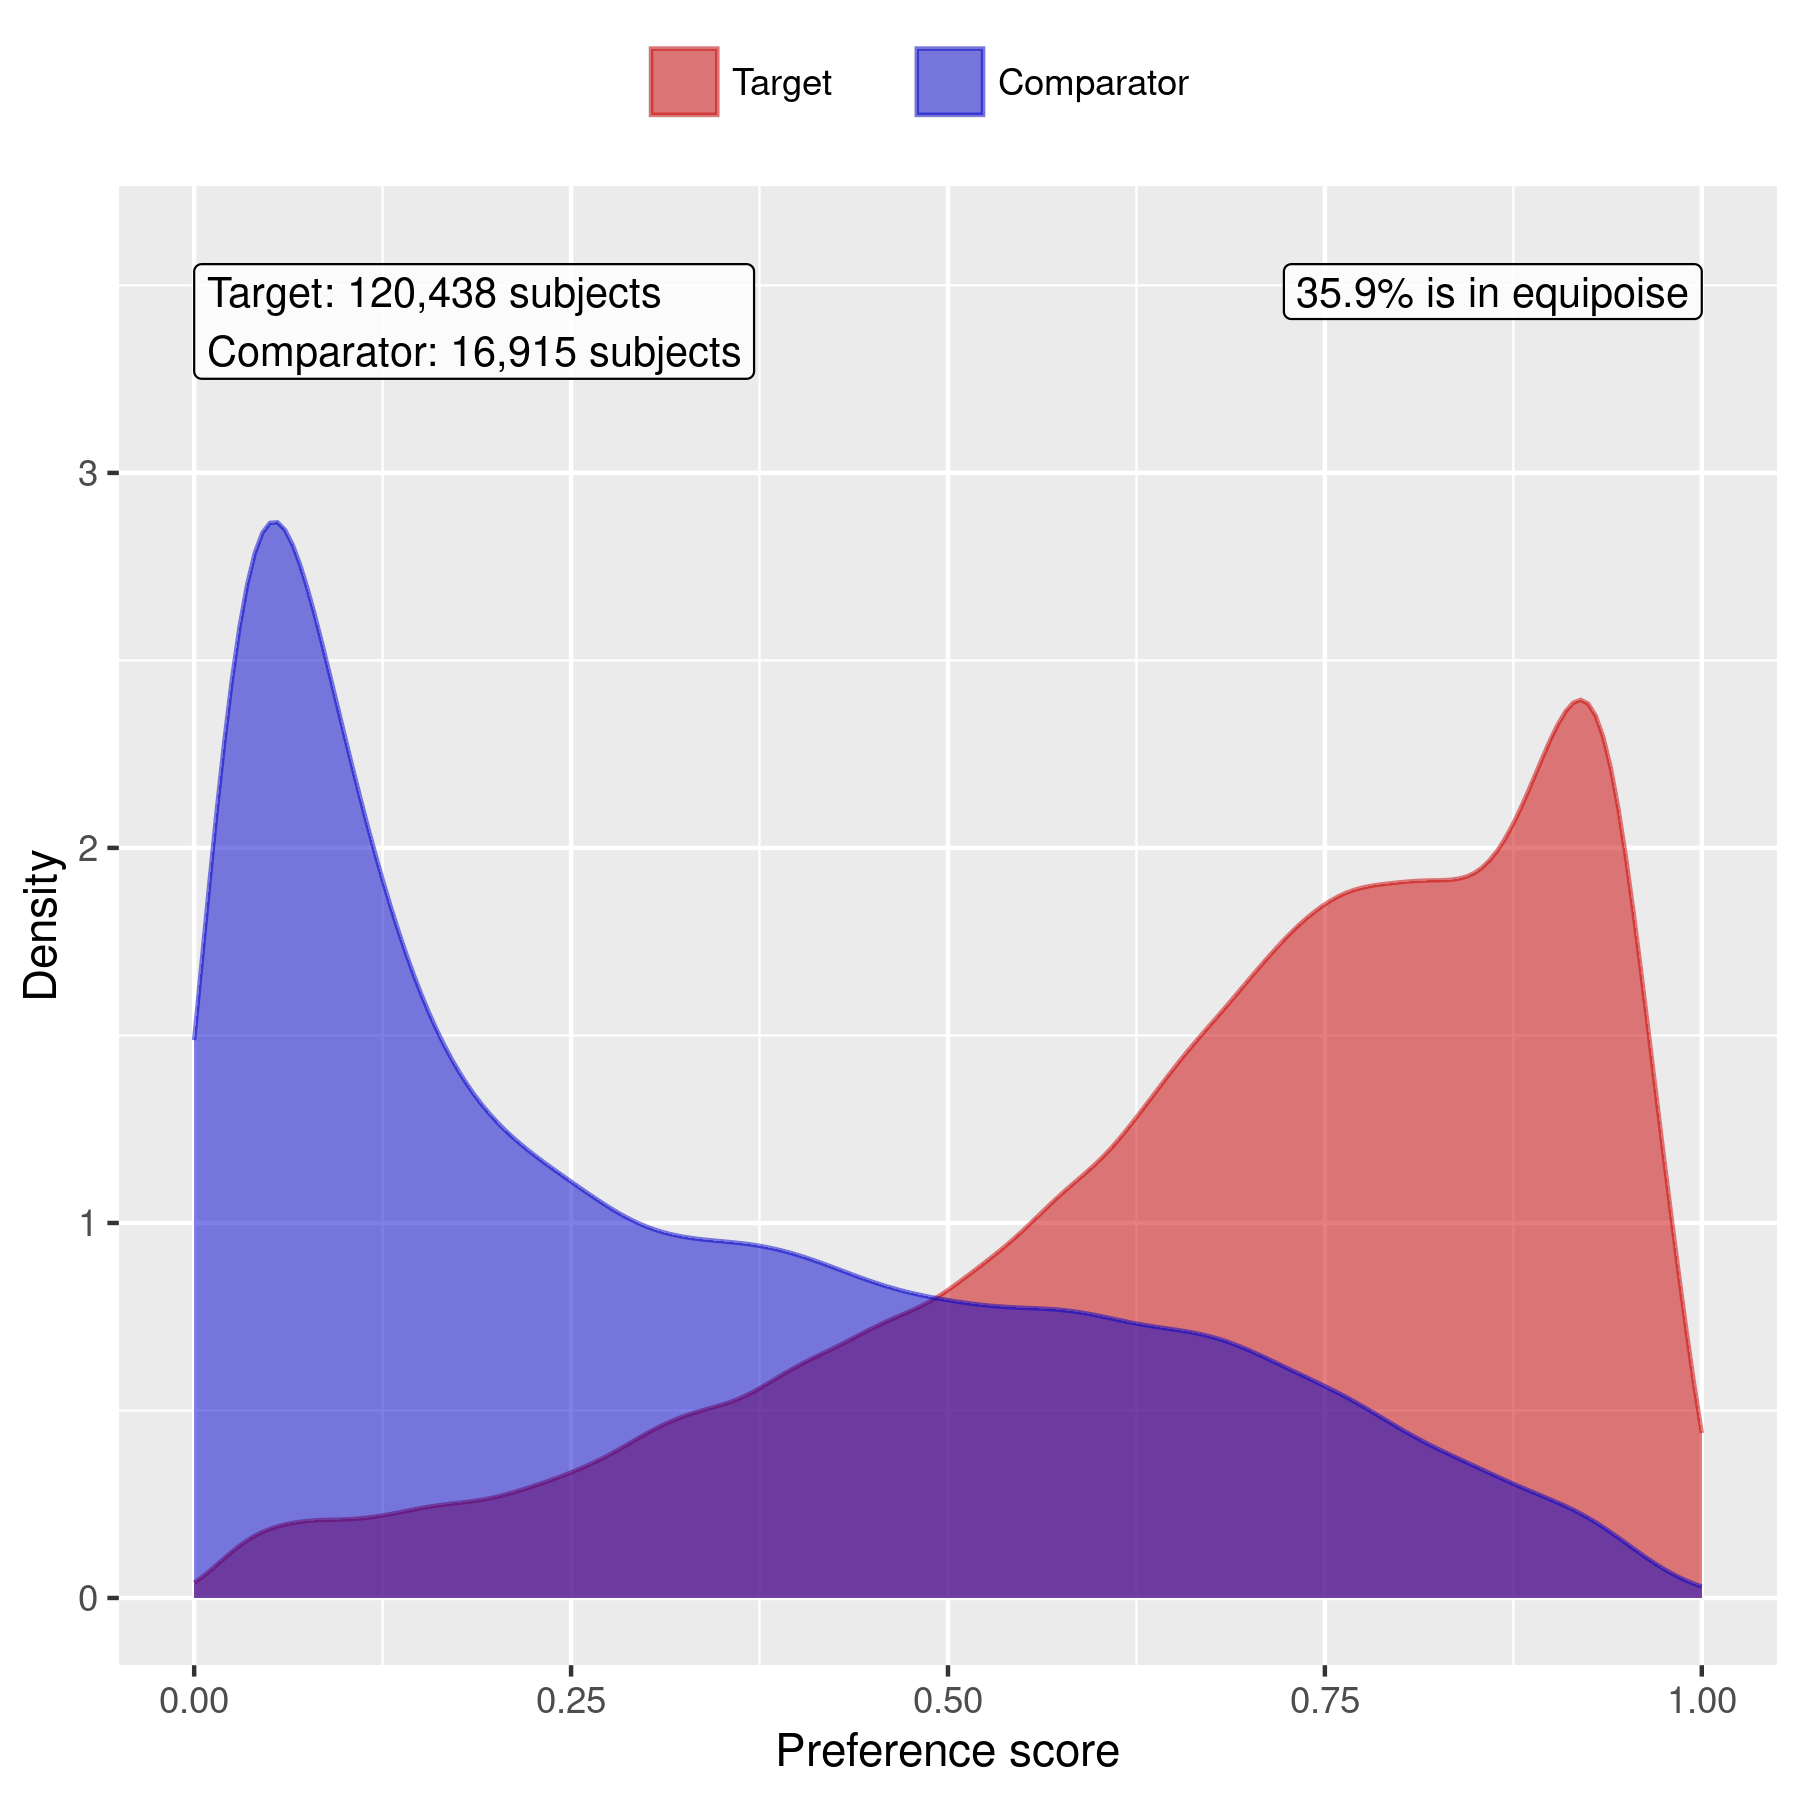
**

**Supp Figure 11.** Preference score distributions of COVID-19 positive group and COVID-19/respiratory negative group in youths.A greater convergence of these distributions indicates a higher similarity in the predicted likelihood of being infected between the COVID-19 positive (red) and negative (blue) participants.

**
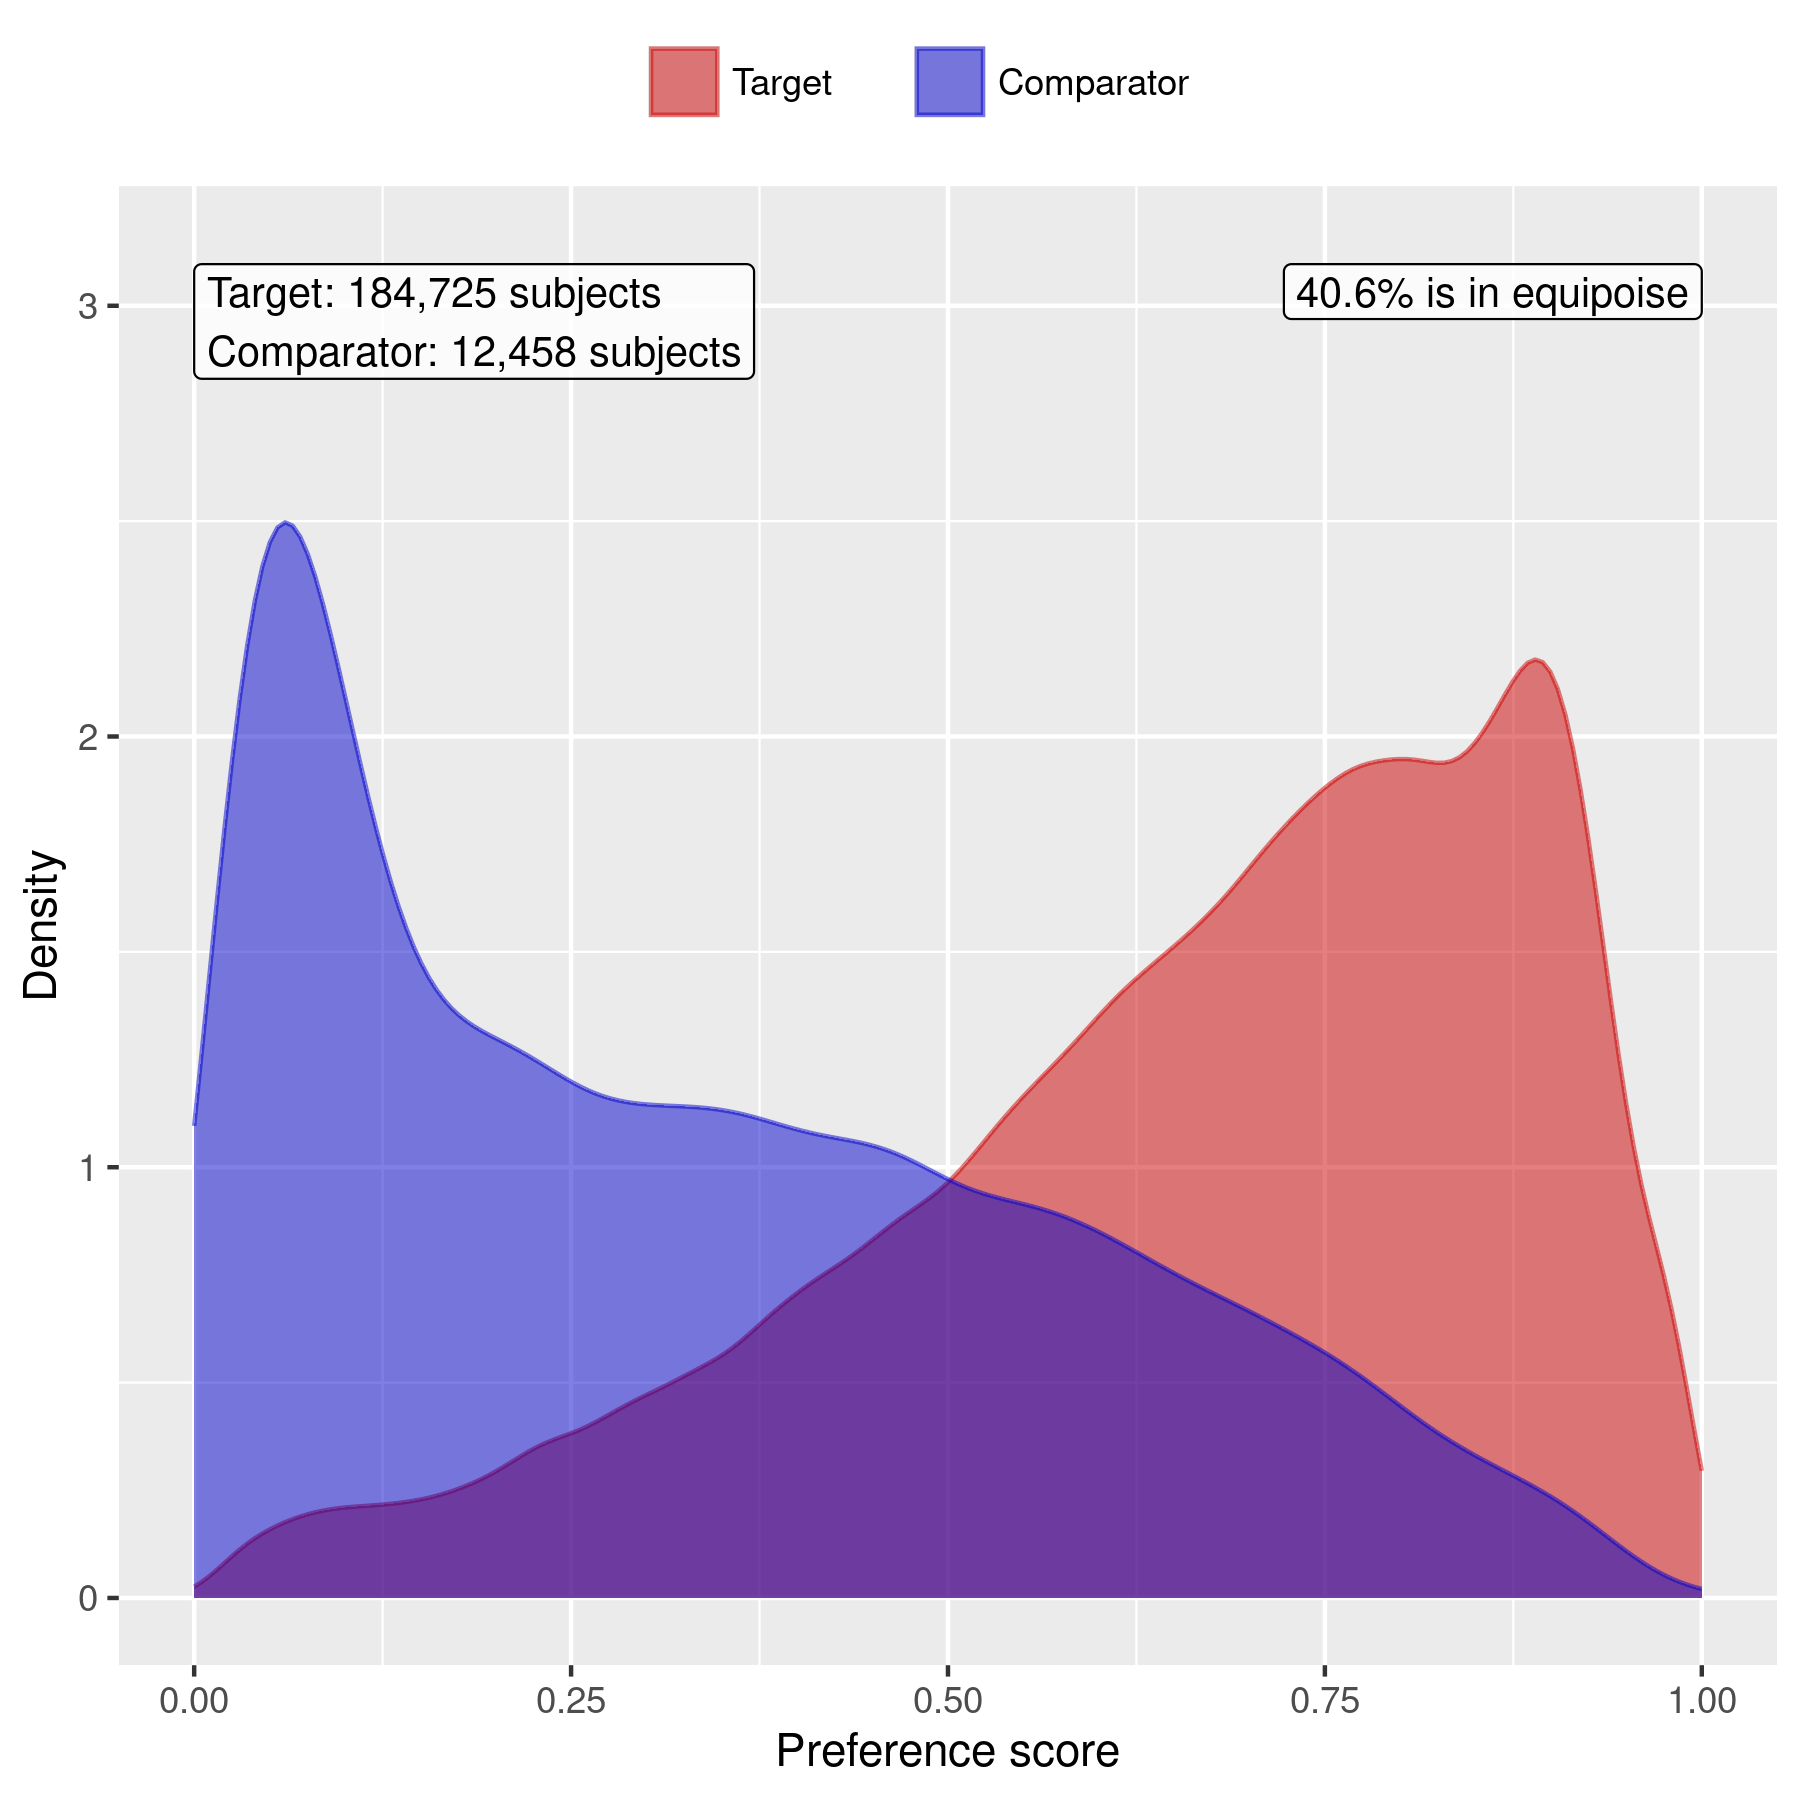
**

**Supp Figure 12.** Patient characteristic balance before and after large-scale PS matching with ratio 1:1 for children. The upper panel displays the top 20 covariates with the largest standardized difference of means before matching, while the lower panel displays the top 20 covariates with the largest standardized difference of means after matching.


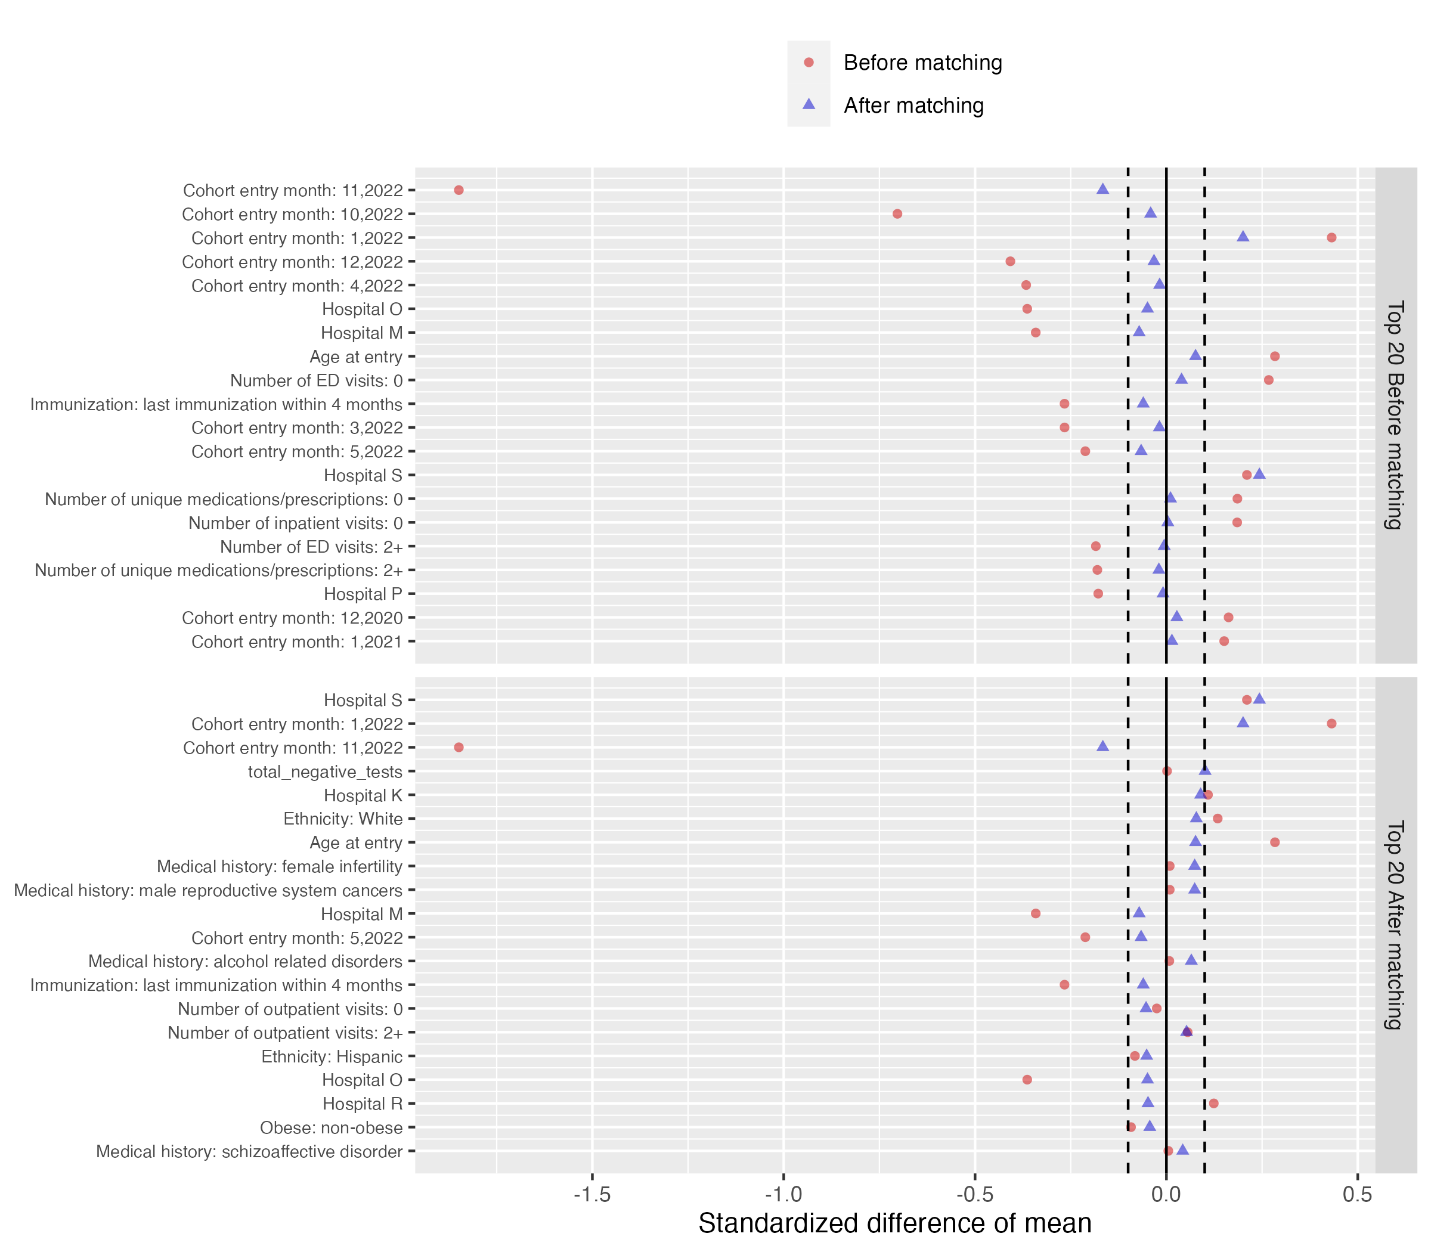


**Supp Figure 13.** Patient characteristic balance before and after large-scale PS matching with ratio 1:1 for youths. The upper panel displays the top 20 covariates with the largest standardized difference of means before matching, while the lower panel displays the top 20 covariates with the largest standardized difference of means after matching.


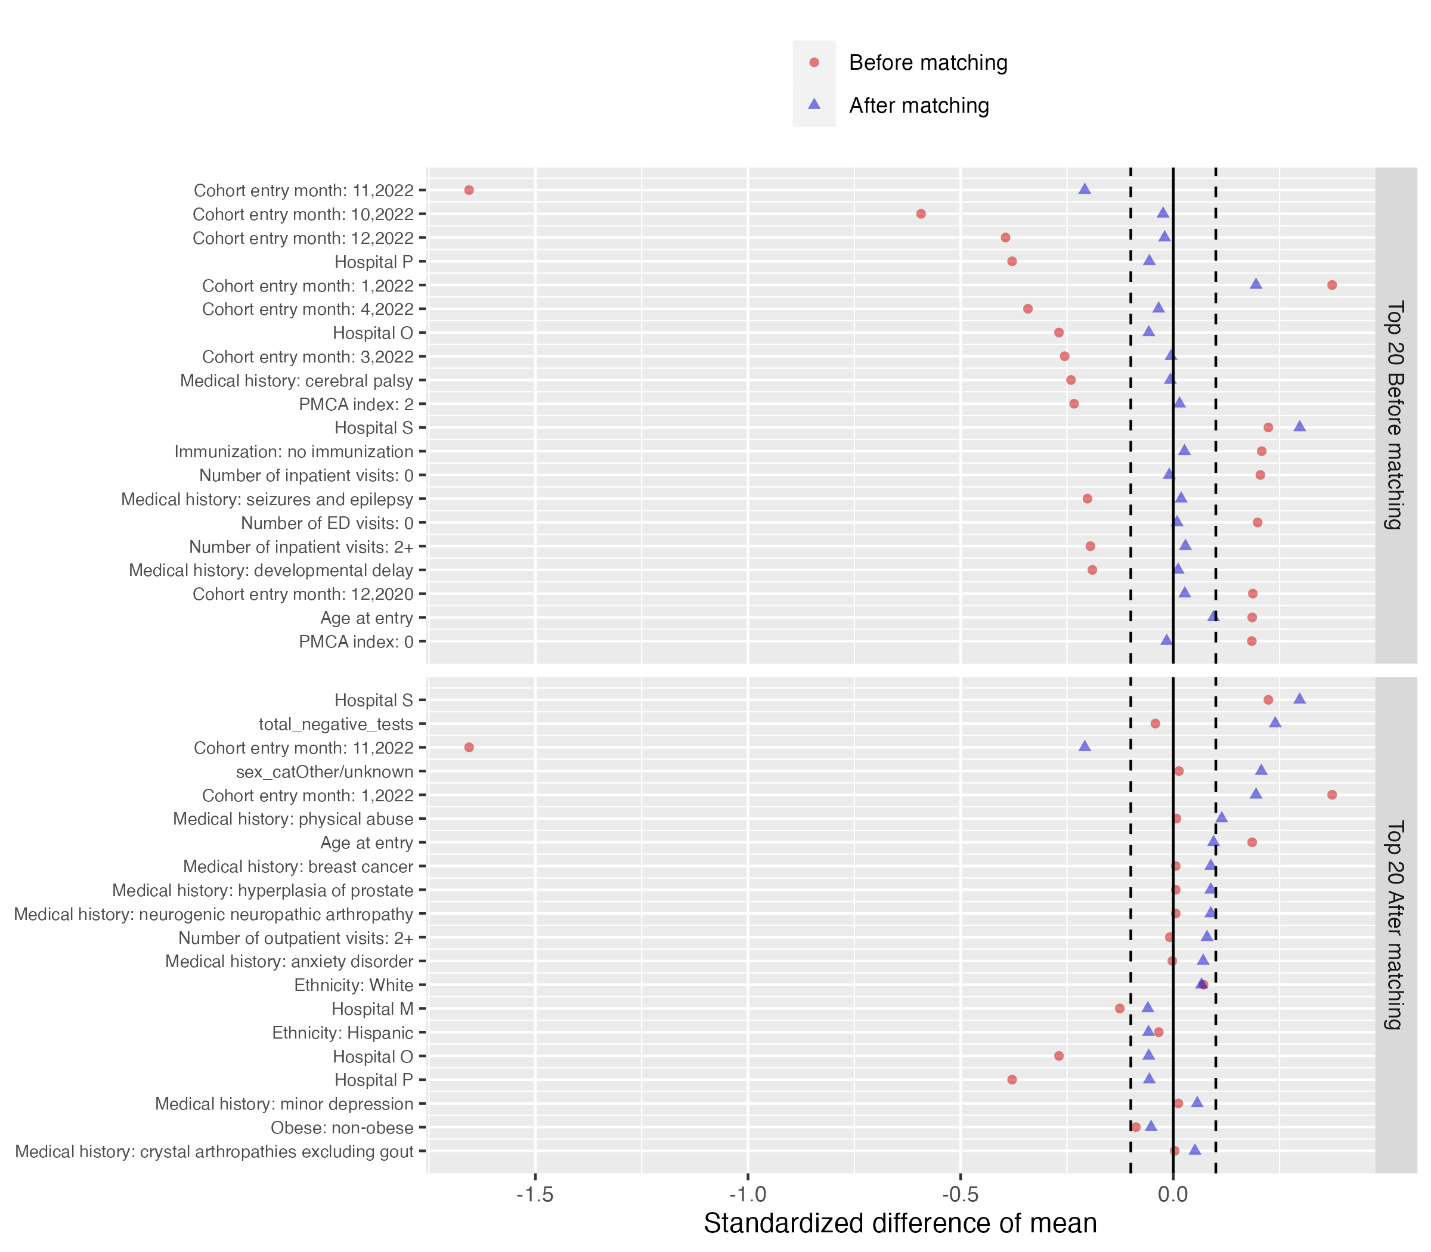


We present the results of the interrupted time series analysis in Supp Figure 14. The analysis focuses on symptoms with a baseline prevalence of at least 1% in either the COVID-19 positive or negative cohorts among children or youths. As shown in the results, the risk of most outcomes, including the composite outcome 'At least one incident,' is not significantly higher in the COVID-19 positive group compared to the COVID-19/respiratory negative group. A key factor contributing to this finding may be the small sample size of the COVID-19/respiratory negative group, which is substantially smaller than the COVID-19 positive group, leading to imbalanced cohorts for analysis. This imbalance also highlights a limitation of the difference-in-difference analysis, which typically requires the COVID-19/respiratory negative group to have at least four times the sample size of the COVID-19 positive group to effectively detect interactions.

**Supp Figure 14.** Estimated risk difference of having high-prevalence outcomes between the COVID-19 positive group and the COVID-19/respiratory negative group


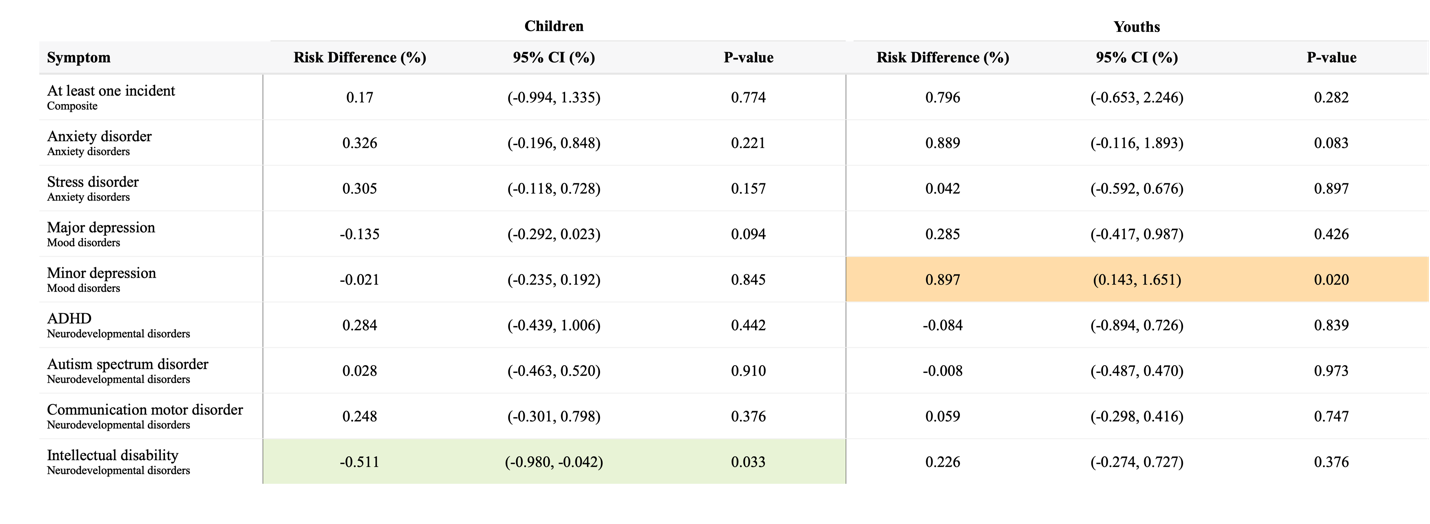


# Section 7 Supplemental Results: sensitivity analysis for sub-variants

We conducted sensitivity analyses to investigate if the risk of mental health conditions would be affected by the sub-variants. Therefore, we conducted the subgroup analysis based on three time periods: pre-Delta (March 1, 2021 to June 1, 2021), Delta (July 1, 2021 to November 30, 2021), and Omicron (January 1, 2022 to December 3, 2022). The subgroups for the time periods were defined based on the index date of the patients. We performed the same PS matching procedure and difference-in-difference method to estimate the risk difference.

## A. Empirical equipoise assessment

**Supp Figure 15.** Preference score distributions of COVID-19 positive and negative groups in children during pre-Delta period. A greater convergence of these distributions indicates a higher similarity in the predicted likelihood of being infected between the COVID-19 positive (red) and negative (blue) participants.


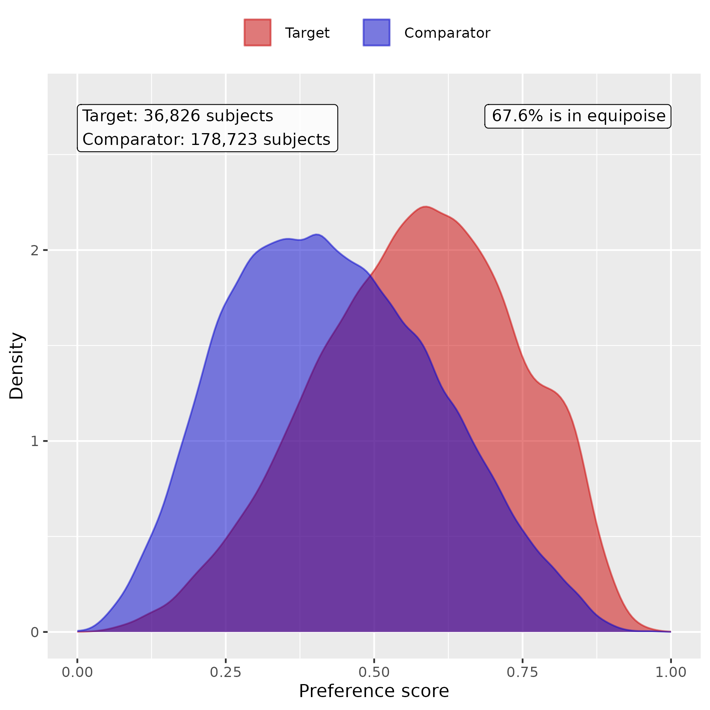


**Supp Figure 16.** Preference score distributions of COVID-19 positive and negative groups in children during Delta period. A greater convergence of these distributions indicates a higher similarity in the predicted likelihood of being infected between the COVID-19 positive (red) and negative (blue) participants.


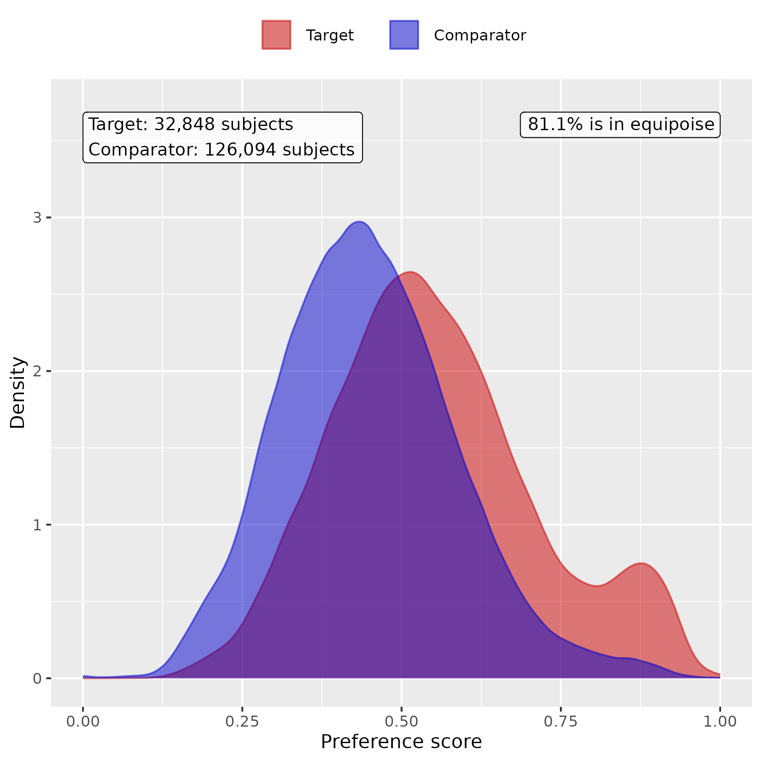


**Supp Figure 17.** Preference score distributions of COVID-19 positive and negative groups in children during Omicron period. A greater convergence of these distributions indicates a higher similarity in the predicted likelihood of being infected between the COVID-19 positive (red) and negative (blue) participants.


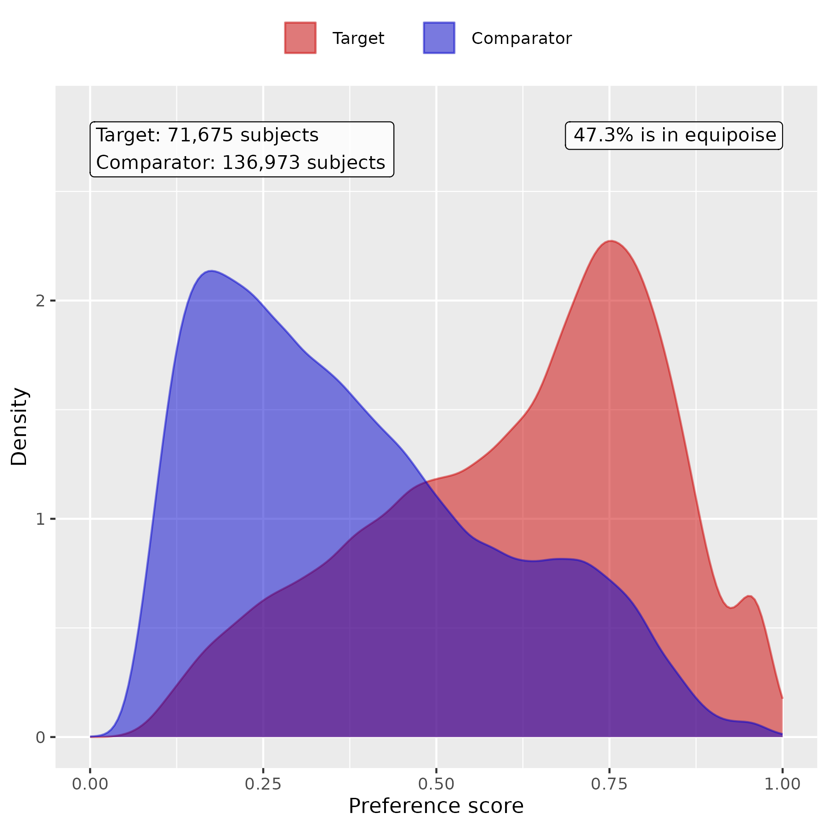


**Supp Figure 18.** Preference score distributions of COVID-19 positive and negative groups for youths in pre-Delta period. A greater convergence of these distributions indicates a higher similarity in the predicted likelihood of being infected between the COVID-19 positive (red) and negative (blue) participants.


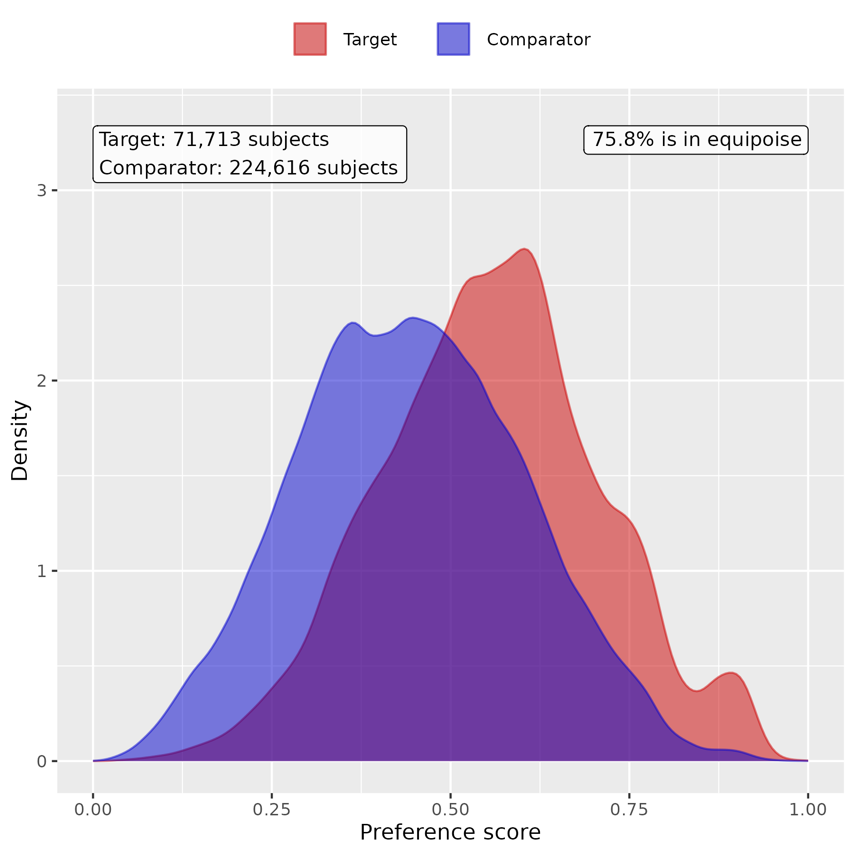


**Supp Figure 19.** Preference score distributions of COVID-19 positive and negative groups for youths in Delta period. A greater convergence of these distributions indicates a higher similarity in the predicted likelihood of being infected between the COVID-19 positive (red) and negative (blue) participants.


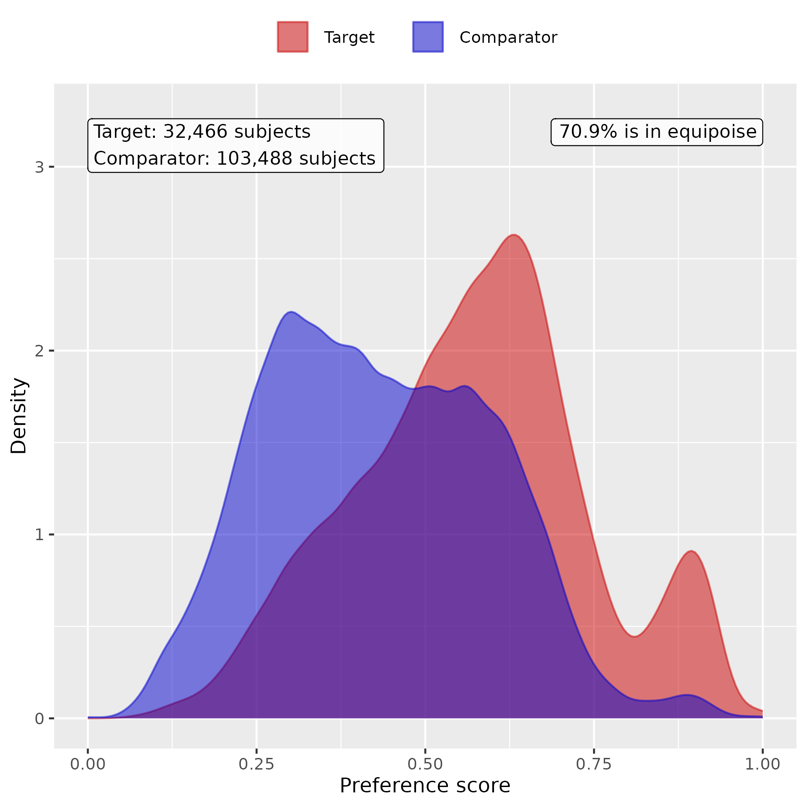


**Supp Figure 20.** Preference score distributions of COVID-19 positive and negative groups for youths in Omicron period. A greater convergence of these distributions indicates a higher similarity in the predicted likelihood of being infected between the COVID-19 positive (red) and negative (blue) participants.


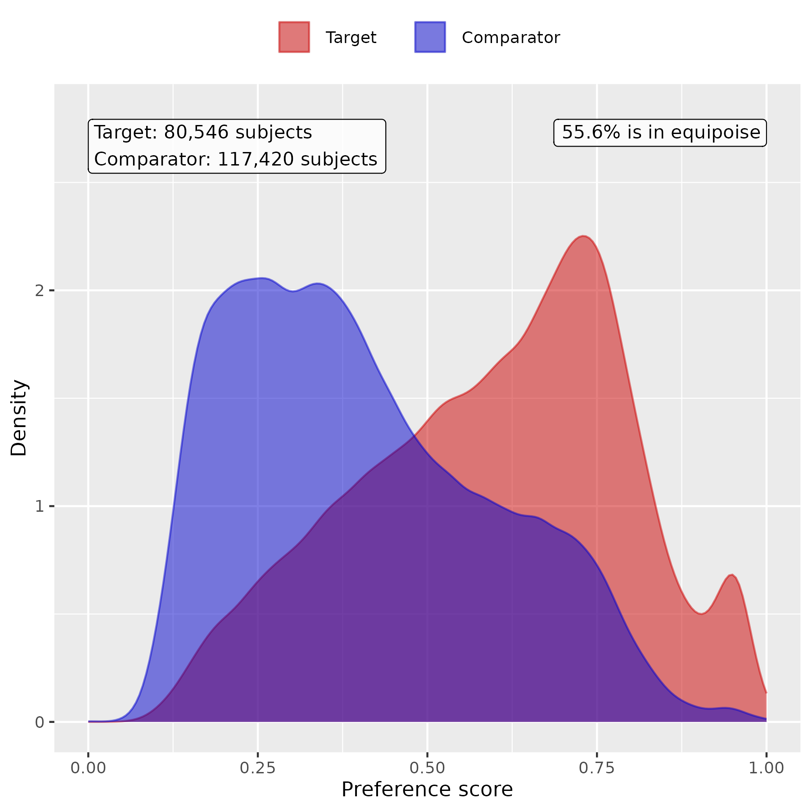


## B. Patient characteristic balance

**Supp Figure 21.** Patient characteristic balance before and after large-scale PS matching with ratio 1:2 for children in pre-Delta period. The upper panel displays the top 20 covariates with the largest standardized difference of means before matching, while the lower panel displays the top 20 covariates with the largest standardized difference of means after matching.


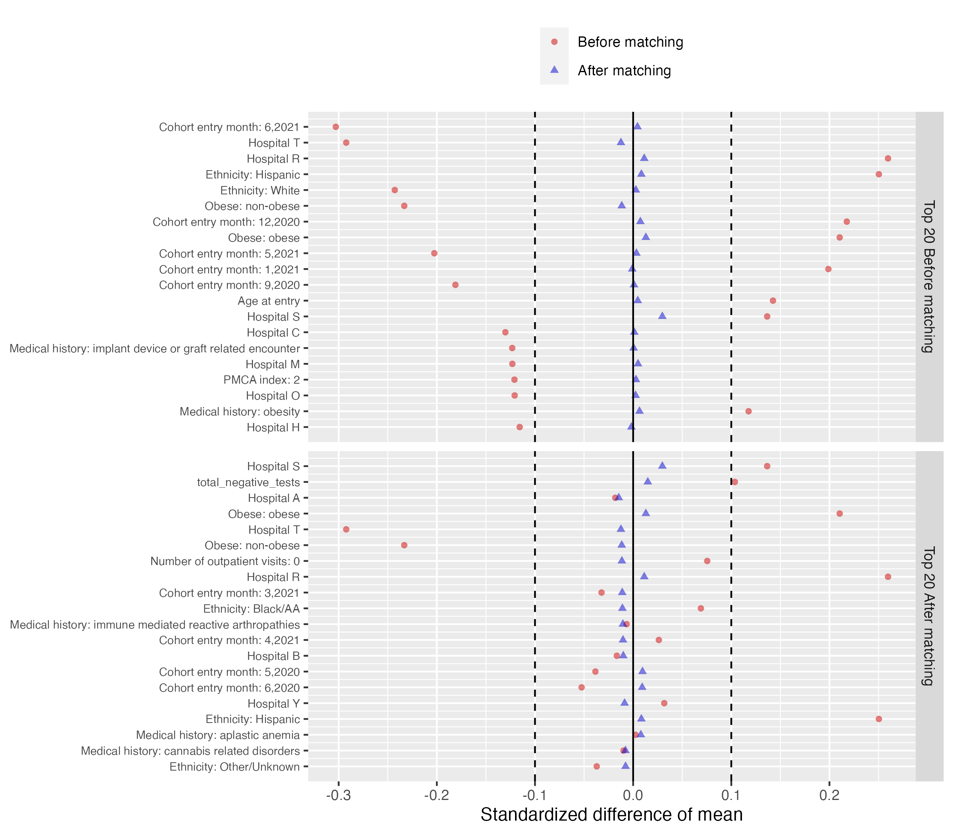


**Supp Figure 22.** Patient characteristic balance before and after large-scale PS matching with ratio 1:2 for children in Delta period. The upper panel displays the top 20 covariates with the largest standardized difference of means before matching, while the lower panel displays the top 20 covariates with the largest standardized difference of means after matching.


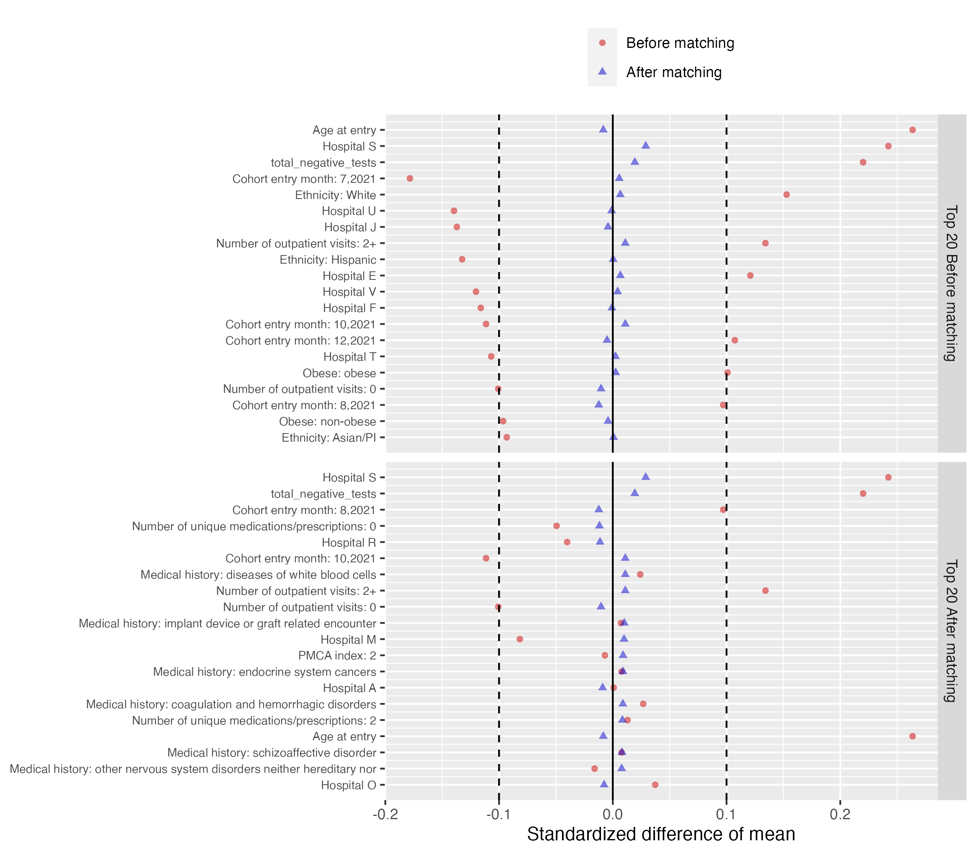


**Supp Figure 23.** Patient characteristic balance before and after large-scale PS matching with ratio 1:2 for children in Omicron period. The upper panel displays the top 20 covariates with the largest standardized difference of means before matching, while the lower panel displays the top 20 covariates with the largest standardized difference of means after matching.


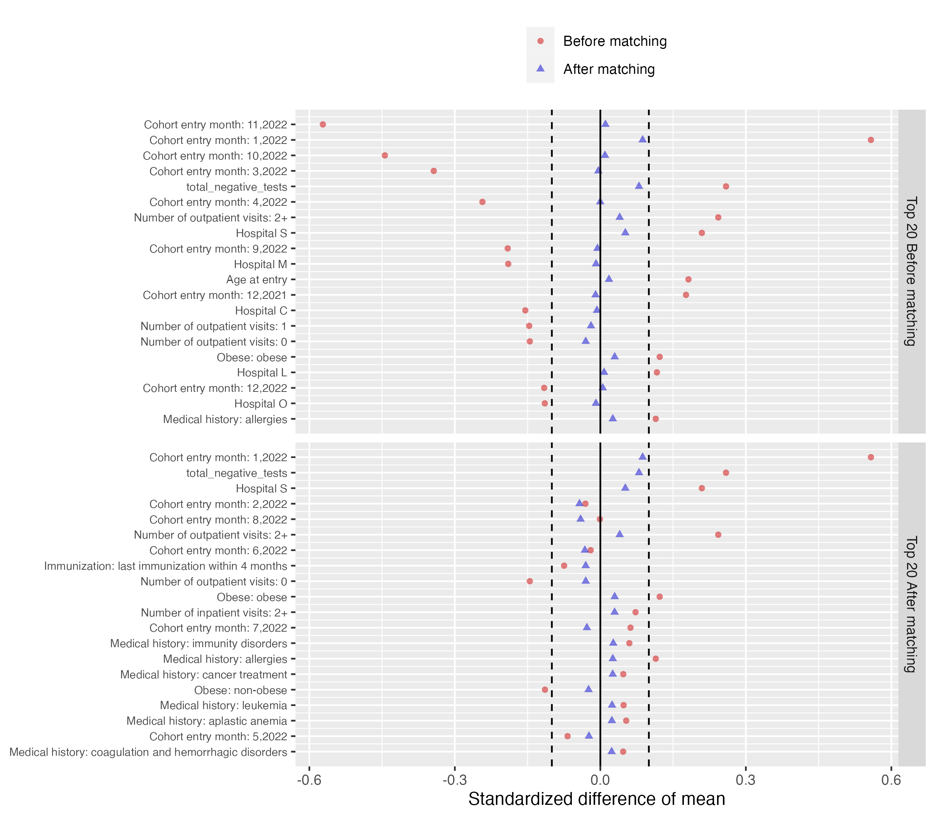


**Supp Figure 24.** Patient characteristic balance before and after large-scale PS matching with ratio 1:2 for youths in pre-Delta period. The upper panel displays the top 20 covariates with the largest standardized difference of means before matching, while the lower panel displays the top 20 covariates with the largest standardized difference of means after matching.


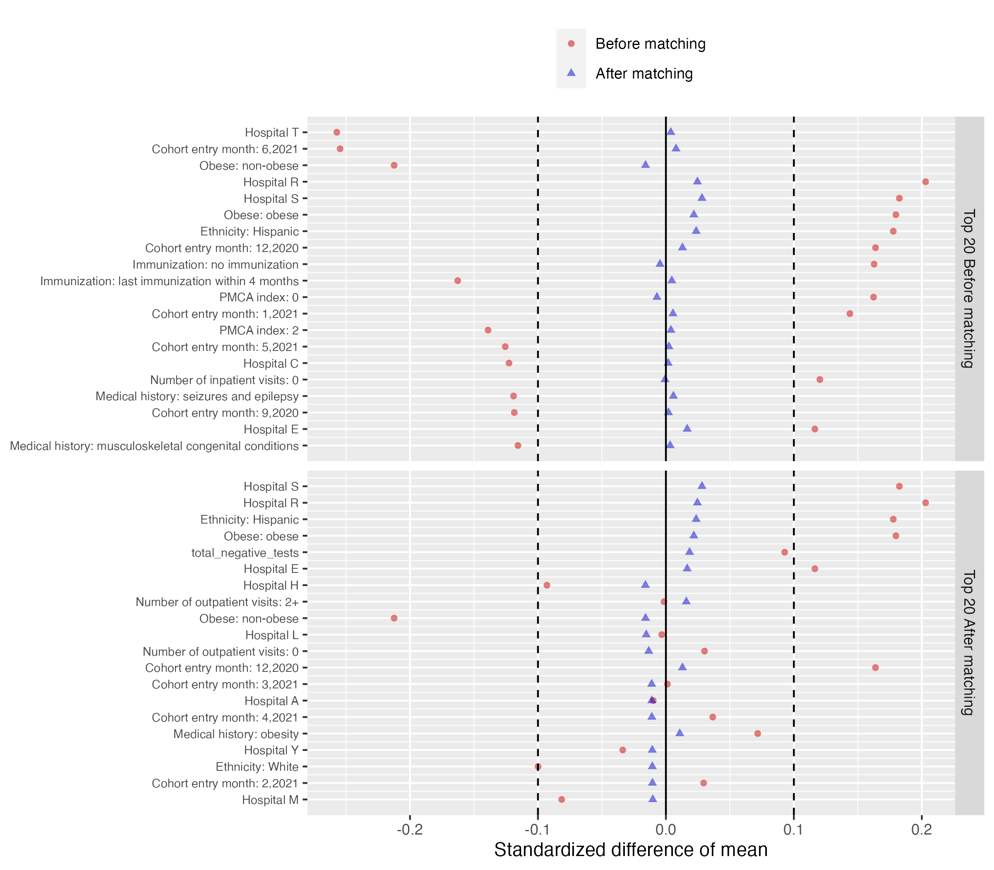


**Supp Figure 25.** Patient characteristic balance before and after large-scale PS matching with ratio 1:2 for youths in Delta period. The upper panel displays the top 20 covariates with the largest standardized difference of means before matching, while the lower panel displays the top 20 covariates with the largest standardized difference of means after matching.


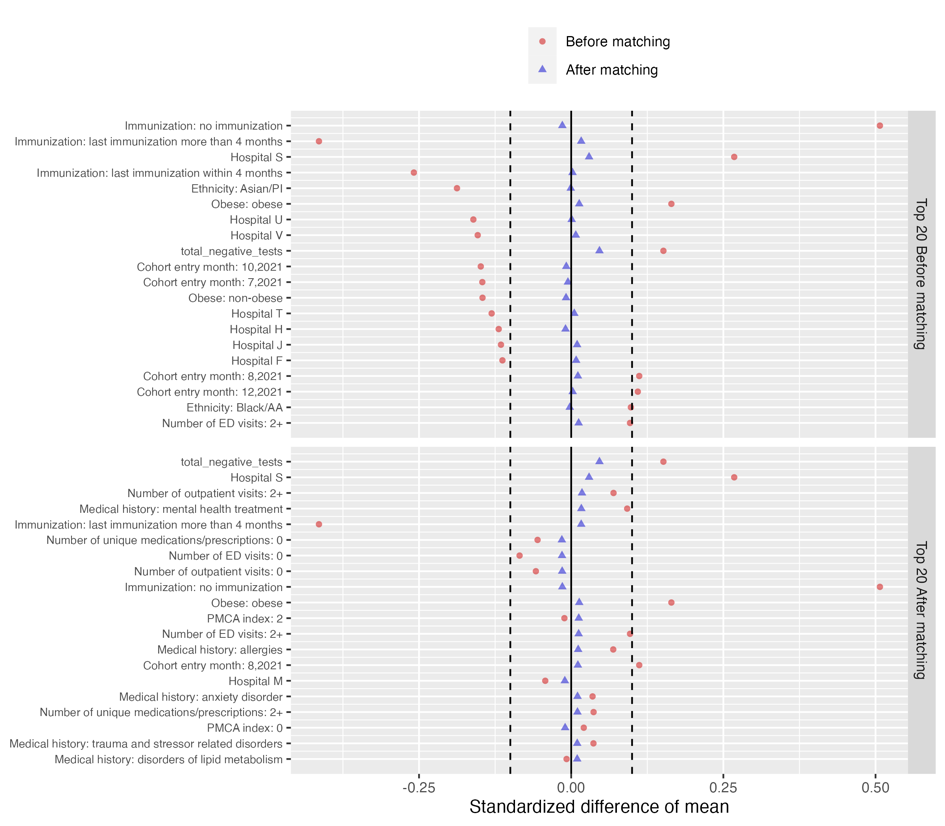


**Supp Figure 26.** Patient characteristic balance before and after large-scale PS matching with ratio 1:2 for youths in Omicron period. The upper panel displays the top 20 covariates with the largest standardized difference of means before matching, while the lower panel displays the top 20 covariates with the largest standardized difference of means after matching.


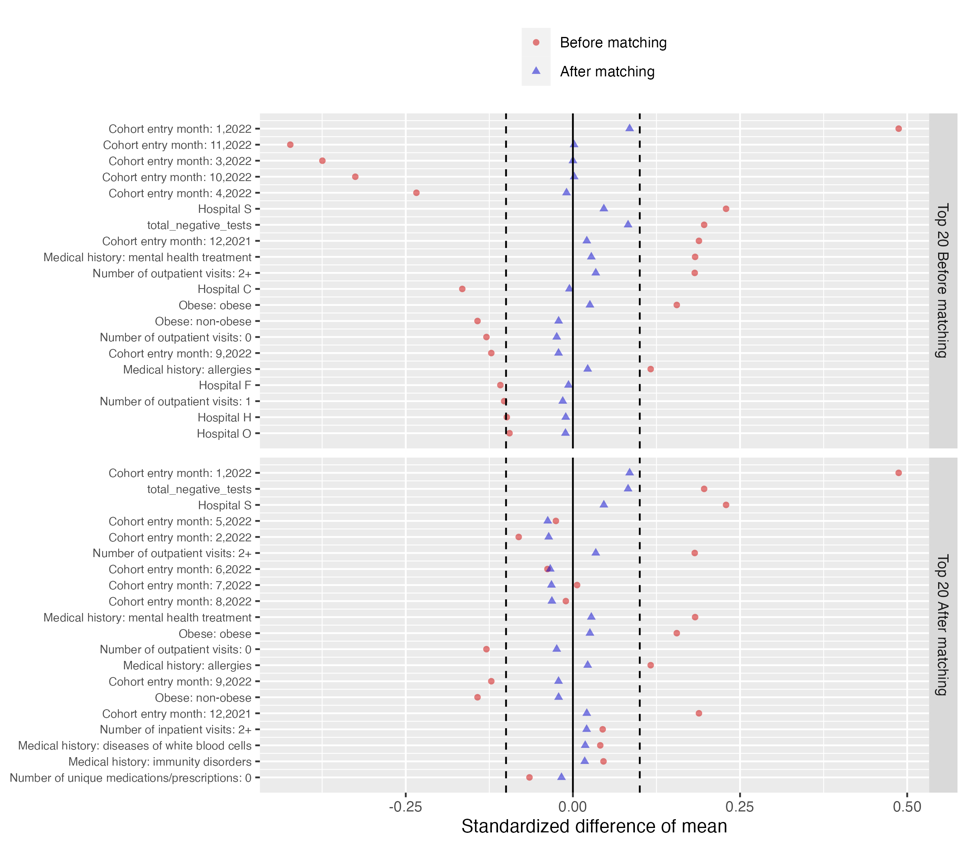


## C. Risk difference of COVID-19 positive group compared to COVID-19 negative group

**Supp Table 3.** Estimated risk difference in mental health conditions between the COVID-19 positive group and COVID-19 negative group for children in pre-Delta period

| **Category** | **Cluster** | **Risk difference (%)** | **95% CI (%)** | **P value** |
| --- | --- | --- | --- | --- |
| Composite | At least one incident | 0.999 | (0.429, 1.568) | <0.001 |
| Adverse childhood experiences | Emotional abuse | 0.01 | (-0.018, 0.037) | 0.5 |
|  | Neglect | 0.005 | (-0.018, 0.027) | 0.686 |
|  | Physical abuse | 0 | (-0.054, 0.055) | 0.992 |
|  | Sexual abuse | 0 | (-0.046, 0.046) | 0.99 |
| Anxiety disorders | Anxiety disorder | 0.124 | (-0.135, 0.384) | 0.348 |
|  | OCD | 0.105 | (0.039, 0.171) | 0.002 |
|  | Somatoform disorder | 0.025 | (-0.056, 0.107) | 0.547 |
|  | Stress disorder | 0.111 | (-0.108, 0.329) | 0.322 |
| Disruptive behavior disorders | Conduct disorder | -0.001 | (-0.126, 0.124) | 0.984 |
|  | Impulse control disorder | -0.07 | (-0.189, 0.050) | 0.253 |
|  | Oppositional defiant disorder | 0.003 | (-0.105, 0.111) | 0.961 |
| Eating and feeding disorders | Avoidant restrictive food intake | -0.018 | (-0.114, 0.078) | 0.717 |
|  | Other eating and feeding disorder | -0.023 | (-0.071, 0.024) | 0.336 |
| Elimination disorders | Encopresis | 0.024 | (-0.046, 0.095) | 0.499 |
|  | Enuresis | -0.048 | (-0.190, 0.095) | 0.513 |
| Gender dysphoria sexual dysfunction | Gender dysphoria | 0.005 | (-0.030, 0.040) | 0.778 |
|  | Paraphilia | -0.001 | (-0.005, 0.002) | 0.468 |
|  | Sexual dysfunction | 0.003 | (-0.005, 0.011) | 0.468 |
| Intentional self-harm/suicidality | Parasuicidality | -0.02 | (-0.069, 0.029) | 0.427 |
|  | Suicidality | -0.006 | (-0.075, 0.064) | 0.872 |
| Mood disorders | Bipolar disorder | 0.035 | (-0.005, 0.075) | 0.086 |
|  | Major depression | -0.027 | (-0.129, 0.075) | 0.6 |
|  | Minor depression | -0.067 | (-0.176, 0.042) | 0.231 |
| Neurocognitive disorders | Catatonia | -0.003 | (-0.016, 0.010) | 0.646 |
|  | Delirium | 0.066 | (0.011, 0.121) | 0.018 |
|  | Encephalopathy | 0.011 | (-0.031, 0.053) | 0.605 |
| Neurodevelopmental disorders | Academic developmental disorder | 0.017 | (-0.131, 0.165) | 0.82 |
|  | ADHD | 0.122 | (-0.228, 0.473) | 0.493 |
|  | Autism spectrum disorder | 0.153 | (-0.073, 0.380) | 0.185 |
|  | Communication motor disorder | 0.252 | (-0.008, 0.512) | 0.057 |
|  | Intellectual disability | 0.165 | (-0.024, 0.353) | 0.087 |
| Personality disorders | Personality disorder | -0.007 | (-0.034, 0.019) | 0.597 |
| Psychotic disorders | Psychotic disorder | -0.004 | (-0.037, 0.029) | 0.832 |
|  | Schizoaffective disorder | NA | NA | NA |
|  | Schizophrenia | -0.001 | (-0.012, 0.010) | 0.817 |
| Sleep wake disorders | Hypersomnia | 0.031 | (-0.018, 0.079) | 0.217 |
|  | Insomnia | -0.005 | (-0.127, 0.118) | 0.942 |
|  | Parasomnias | 0.03 | (-0.053, 0.113) | 0.477 |
| Standalone symptoms | Anger aggression | 0.064 | (-0.033, 0.161) | 0.199 |
|  | Anxiety symptoms | 0.034 | (-0.050, 0.118) | 0.429 |
|  | Attention symptoms | -0.074 | (-0.188, 0.041) | 0.207 |
|  | Depressive symptoms | -0.019 | (-0.043, 0.005) | 0.117 |
|  | Hallucinations | 0.003 | (-0.036, 0.042) | 0.879 |
| Substance use and dependence | Alcohol | 0.001 | (-0.006, 0.009) | 0.744 |
|  | Opioid related | -0.004 | (-0.016, 0.008) | 0.536 |
|  | Other substances | 0.006 | (-0.012, 0.024) | 0.536 |
|  | THC | NA | NA | NA |
|  | Tobacco | 0.003 | (-0.001, 0.007) | 0.168 |
| Tic disorders | Tic disorder | 0.073 | (-0.022, 0.167) | 0.133 |

**Supp Table 4.** Estimated risk difference in mental health conditions between the COVID-19 positive cohort and COVID-19 negative cohort for children in Delta period

| **Category** | **Cluster** | **Risk difference (%)** | **95% CI (%)** | **P value** |
| --- | --- | --- | --- | --- |
| Composite | At least one incident | 0.716 | (0.089, 1.344) | 0.025 |
| Adverse childhood experiences | Emotional abuse | -0.013 | (-0.047, 0.022) | 0.470 |
|  | Neglect | -0.004 | (-0.024, 0.017) | 0.737 |
|  | Physical abuse | 0.036 | (-0.025, 0.097) | 0.244 |
|  | Sexual abuse | 0.044 | (-0.003, 0.092) | 0.069 |
| Anxiety disorders | Anxiety disorder | 0.397 | (0.107, 0.687) | 0.007 |
|  | OCD | -0.028 | (-0.095, 0.038) | 0.403 |
|  | Somatoform disorder | 0.08 | (-0.005, 0.166) | 0.065 |
|  | Stress disorder | 0.084 | (-0.151, 0.318) | 0.484 |
| Disruptive behavior disorders | Conduct disorder | -0.026 | (-0.155, 0.103) | 0.692 |
|  | Impulse control disorder | -0.025 | (-0.147, 0.098) | 0.694 |
|  | Oppositional defiant disorder | 0.046 | (-0.067, 0.158) | 0.426 |
| Eating and feeding disorders | Avoidant restrictive food intake | 0.038 | (-0.060, 0.137) | 0.447 |
|  | Other eating and feeding disorder | 0.023 | (-0.024, 0.069) | 0.337 |
| Elimination disorders | Encopresis | 0.039 | (-0.037, 0.115) | 0.310 |
|  | Enuresis | -0.083 | (-0.236, 0.069) | 0.284 |
| Gender dysphoria sexual dysfunction | Gender dysphoria | -0.009 | (-0.049, 0.032) | 0.672 |
|  | Paraphilia | 0.002 | (-0.003, 0.006) | 0.467 |
|  | Sexual dysfunction | NA | NA | NA |
| Intentional self-harm/suicidality | Parasuicidality | 0.014 | (-0.041, 0.068) | 0.620 |
|  | Suicidality | 0.023 | (-0.055, 0.100) | 0.566 |
| Mood disorders | Bipolar disorder | 0.02 | (-0.025, 0.065) | 0.372 |
|  | Major depression | -0.004 | (-0.095, 0.088) | 0.940 |
|  | Minor depression | 0.08 | (-0.040, 0.201) | 0.192 |
| Neurocognitive disorders | Catatonia | 0.006 | (-0.005, 0.017) | 0.262 |
|  | Delirium | 0.063 | (0.011, 0.115) | 0.018 |
|  | Encephalopathy | 0.001 | (-0.040, 0.041) | 0.972 |
| Neurodevelopmental disorders | Academic developmental disorder | 0.01 | (-0.146, 0.166) | 0.901 |
|  | ADHD | 0.185 | (-0.223, 0.593) | 0.374 |
|  | Autism spectrum disorder | 0.07 | (-0.197, 0.337) | 0.606 |
|  | Communication motor disorder | 0.07 | (-0.208, 0.348) | 0.622 |
|  | Intellectual disability | 0.012 | (-0.183, 0.208) | 0.900 |
| Personality disorders | Personality disorder | 0.02 | (-0.008, 0.049) | 0.160 |
| Psychotic disorders | Psychotic disorder | -0.008 | (-0.039, 0.022) | 0.595 |
|  | Schizoaffective disorder | 0.003 | (-0.001, 0.008) | 0.170 |
|  | Schizophrenia | -0.003 | (-0.011, 0.005) | 0.428 |
| Sleep wake disorders | Hypersomnia | -0.065 | (-0.114, -0.016) | 0.010 |
|  | Insomnia | -0.024 | (-0.158, 0.111) | 0.733 |
|  | Parasomnias | 0.027 | (-0.058, 0.112) | 0.535 |
| Standalone symptoms | Anger aggression | 0.039 | (-0.067, 0.145) | 0.470 |
|  | Anxiety symptoms | 0.106 | (0.014, 0.197) | 0.023 |
|  | Attention symptoms | 0.035 | (-0.098, 0.168) | 0.605 |
|  | Depressive symptoms | 0.008 | (-0.018, 0.035) | 0.538 |
|  | Hallucinations | 0.007 | (-0.031, 0.044) | 0.728 |
| Substance use and dependence | Alcohol | 0 | (-0.006, 0.006) | 1.000 |
|  | Opioid related | 0 | (-0.010, 0.010) | 0.971 |
|  | Other substances | 0.018 | (-0.006, 0.041) | 0.139 |
|  | THC | NA | NA | NA |
|  | Tobacco | 0.003 | (-0.009, 0.015) | 0.604 |
| Tic disorders | Tic disorder | 0.071 | (-0.039, 0.181) | 0.204 |

**Supp Table 5.** Estimated risk difference in mental health conditions between the COVID-19 positive cohort and COVID-19 negative cohort for children in Omicron period

| **Category** | **Cluster** | **Risk difference (%)** | **95% CI (%)** | **P value** |
| --- | --- | --- | --- | --- |
| Composite | At least one incident | 0.618 | (0.112, 1.124) | 0.017 |
| Adverse childhood experiences | Emotional abuse | -0.024 | (-0.058, 0.010) | 0.160 |
|  | Neglect | 0.014 | (-0.007, 0.034) | 0.185 |
|  | Physical abuse | -0.004 | (-0.054, 0.047) | 0.887 |
|  | Sexual abuse | -0.007 | (-0.043, 0.029) | 0.698 |
| Anxiety disorders | Anxiety disorder | 0.304 | (0.079, 0.529) | 0.008 |
|  | OCD | 0.024 | (-0.031, 0.080) | 0.393 |
|  | Somatoform disorder | 0.014 | (-0.066, 0.095) | 0.729 |
|  | Stress disorder | 0.042 | (-0.138, 0.223) | 0.646 |
| Disruptive behavior disorders | Conduct disorder | -0.046 | (-0.149, 0.056) | 0.378 |
|  | Impulse control disorder | -0.013 | (-0.108, 0.081) | 0.783 |
|  | Oppositional defiant disorder | 0.037 | (-0.042, 0.117) | 0.357 |
| Eating and feeding disorders | Avoidant restrictive food intake | 0.07 | (-0.020, 0.161) | 0.126 |
|  | Other eating and feeding disorder | -0.009 | (-0.057, 0.038) | 0.704 |
| Elimination disorders | Encopresis | 0.058 | (-0.005, 0.122) | 0.071 |
|  | Enuresis | 0.09 | (-0.029, 0.209) | 0.137 |
| Gender dysphoria sexual dysfunction | Gender dysphoria | -0.004 | (-0.036, 0.028) | 0.790 |
|  | Paraphilia | -0.001 | (-0.004, 0.002) | 0.400 |
|  | Sexual dysfunction | -0.002 | (-0.010, 0.005) | 0.551 |
| Intentional self-harm/suicidality | Parasuicidality | -0.007 | (-0.051, 0.037) | 0.753 |
|  | Suicidality | 0.034 | (-0.026, 0.093) | 0.265 |
| Mood disorders | Bipolar disorder | 0.001 | (-0.034, 0.035) | 0.970 |
|  | Major depression | -0.033 | (-0.095, 0.030) | 0.307 |
|  | Minor depression | 0.015 | (-0.076, 0.106) | 0.746 |
| Neurocognitive disorders | Catatonia | 0 | (-0.009, 0.009) | 0.963 |
|  | Delirium | 0.022 | (-0.027, 0.071) | 0.379 |
|  | Encephalopathy | -0.006 | (-0.038, 0.026) | 0.718 |
| Neurodevelopmental disorders | Academic developmental disorder | 0.035 | (-0.093, 0.162) | 0.596 |
|  | ADHD | 0.136 | (-0.169, 0.440) | 0.382 |
|  | Autism spectrum disorder | 0.133 | (-0.101, 0.366) | 0.266 |
|  | Communication motor disorder | 0.095 | (-0.153, 0.343) | 0.452 |
|  | Intellectual disability | 0.061 | (-0.109, 0.232) | 0.482 |
| Personality disorders | Personality disorder | -0.005 | (-0.027, 0.017) | 0.639 |
| Psychotic disorders | Psychotic disorder | 0.004 | (-0.024, 0.031) | 0.793 |
|  | Schizoaffective disorder | 0.001 | (-0.004, 0.006) | 0.627 |
|  | Schizophrenia | 0.002 | (-0.003, 0.007) | 0.376 |
| Sleep wake disorders | Hypersomnia | -0.008 | (-0.040, 0.024) | 0.615 |
|  | Insomnia | 0.018 | (-0.081, 0.118) | 0.716 |
|  | Parasomnias | 0.076 | (0.002, 0.150) | 0.044 |
| Standalone symptoms | Anger aggression | 0.002 | (-0.080, 0.083) | 0.971 |
|  | Anxiety symptoms | 0.051 | (-0.034, 0.135) | 0.238 |
|  | Attention symptoms | 0.046 | (-0.063, 0.154) | 0.409 |
|  | Depressive symptoms | 0.008 | (-0.013, 0.030) | 0.450 |
|  | Hallucinations | -0.004 | (-0.034, 0.026) | 0.793 |
| Substance use and dependence | Alcohol | -0.003 | (-0.008, 0.003) | 0.310 |
|  | Opioid related | 0.006 | (-0.006, 0.018) | 0.299 |
|  | Other substances | 0.009 | (-0.007, 0.024) | 0.266 |
|  | THC | 0 | (-0.004, 0.004) | 1.000 |
|  | Tobacco | -0.004 | (-0.010, 0.002) | 0.199 |
| Tic disorders | Tic disorder | 0.029 | (-0.059, 0.117) | 0.516 |

**Supp Table 6.** Estimated risk difference in mental health conditions between the COVID-19 positive cohort and COVID-19 negative cohort for youths in pre-Delta period

| **Category** | **Cluster** | **Risk difference (%)** | **95% CI (%)** | **P value** |
| --- | --- | --- | --- | --- |
| Composite | At least one incident | 0.782 | (0.337, 1.227) | <0.001 |
| Adverse childhood experiences | Emotional abuse | 0.01 | (-0.007, 0.026) | 0.272 |
|  | Neglect | 0.002 | (-0.013, 0.016) | 0.804 |
|  | Physical abuse | 0.019 | (-0.023, 0.061) | 0.38 |
|  | Sexual abuse | 0.006 | (-0.031, 0.044) | 0.743 |
| Anxiety disorders | Anxiety disorder | 0.357 | (0.057, 0.657) | 0.02 |
|  | OCD | 0.016 | (-0.059, 0.090) | 0.681 |
|  | Somatoform disorder | 0.003 | (-0.078, 0.084) | 0.941 |
|  | Stress disorder | 0.253 | (0.060, 0.446) | 0.01 |
| Disruptive behavior disorders | Conduct disorder | -0.014 | (-0.072, 0.044) | 0.634 |
|  | Impulse control disorder | -0.024 | (-0.100, 0.053) | 0.547 |
|  | Oppositional defiant disorder | 0.044 | (-0.029, 0.117) | 0.233 |
| Eating and feeding disorders | Avoidant restrictive food intake | -0.089 | (-0.205, 0.028) | 0.137 |
|  | Other eating and feeding disorder | 0.02 | (-0.007, 0.046) | 0.142 |
| Elimination disorders | Encopresis | 0.005 | (-0.015, 0.025) | 0.608 |
|  | Enuresis | 0.027 | (-0.024, 0.077) | 0.3 |
| Gender dysphoria sexual dysfunction | Gender dysphoria | -0.057 | (-0.118, 0.005) | 0.07 |
|  | Paraphilia | 0.003 | (-0.005, 0.011) | 0.495 |
|  | Sexual dysfunction | 0.008 | (-0.009, 0.025) | 0.35 |
| Intentional self-harm/suicidality | Parasuicidality | 0.014 | (-0.047, 0.075) | 0.656 |
|  | Suicidality | 0.146 | (0.027, 0.264) | 0.016 |
| Mood disorders | Bipolar disorder | 0.02 | (-0.029, 0.068) | 0.429 |
|  | Major depression | -0.088 | (-0.328, 0.152) | 0.471 |
|  | Minor depression | 0.11 | (-0.108, 0.327) | 0.323 |
| Neurocognitive disorders | Catatonia | -0.008 | (-0.025, 0.009) | 0.361 |
|  | Delirium | 0.071 | (-0.005, 0.147) | 0.067 |
|  | Encephalopathy | 0.006 | (-0.025, 0.036) | 0.718 |
| Neurodevelopmental disorders | Academic developmental disorder | 0.071 | (-0.006, 0.148) | 0.071 |
|  | ADHD | 0.307 | (0.064, 0.551) | 0.013 |
|  | Autism spectrum disorder | 0.031 | (-0.084, 0.146) | 0.598 |
|  | Communication motor disorder | 0.082 | (-0.003, 0.166) | 0.06 |
|  | Intellectual disability | 0.041 | (-0.064, 0.146) | 0.448 |
| Personality disorders | Personality disorder | -0.027 | (-0.071, 0.018) | 0.24 |
| Psychotic disorders | Psychotic disorder | -0.016 | (-0.063, 0.031) | 0.496 |
|  | Schizoaffective disorder | -0.002 | (-0.023, 0.019) | 0.879 |
|  | Schizophrenia | 0.004 | (-0.026, 0.033) | 0.804 |
| Sleep wake disorders | Hypersomnia | 0.017 | (-0.028, 0.063) | 0.453 |
|  | Insomnia | 0.094 | (-0.015, 0.203) | 0.09 |
|  | Parasomnias | 0.012 | (-0.031, 0.056) | 0.577 |
| Standalone symptoms | Anger aggression | 0.062 | (-0.003, 0.126) | 0.06 |
|  | Anxiety symptoms | 0.017 | (-0.045, 0.078) | 0.592 |
|  | Attention symptoms | 0.052 | (-0.018, 0.121) | 0.148 |
|  | Depressive symptoms | 0.023 | (-0.002, 0.049) | 0.075 |
|  | Hallucinations | 0.007 | (-0.032, 0.046) | 0.715 |
| Substance use and dependence | Alcohol | 0.018 | (-0.021, 0.057) | 0.376 |
|  | Opioid related | 0.014 | (-0.010, 0.037) | 0.25 |
|  | Other substances | -0.023 | (-0.072, 0.026) | 0.36 |
|  | THC | -0.059 | (-0.119, 0.001) | 0.054 |
|  | Tobacco | -0.002 | (-0.079, 0.076) | 0.967 |
| Tic disorders | Tic disorder | 0.008 | (-0.054, 0.069) | 0.808 |

**Supp Table 7.** Estimated risk difference in mental health conditions between the COVID-19 positive cohort and COVID-19 negative cohort for youths in Delta period

| **Category** | **Cluster** | **Risk difference (%)** | **95% CI (%)** | **P value** |
| --- | --- | --- | --- | --- |
| Composite | At least one incident | 0.903 | (0.188, 1.618) | 0.013 |
| Adverse childhood experiences | Emotional abuse | 0.016 | (-0.017, 0.050) | 0.329 |
|  | Neglect | 0.001 | (-0.025, 0.027) | 0.929 |
|  | Physical abuse | 0.026 | (-0.052, 0.103) | 0.519 |
|  | Sexual abuse | 0.086 | (0.016, 0.155) | 0.016 |
| Anxiety disorders | Anxiety disorder | -0.057 | (-0.538, 0.424) | 0.817 |
|  | OCD | 0.043 | (-0.072, 0.158) | 0.466 |
|  | Somatoform disorder | 0.016 | (-0.112, 0.144) | 0.809 |
|  | Stress disorder | -0.149 | (-0.464, 0.167) | 0.356 |
| Disruptive behavior disorders | Conduct disorder | -0.003 | (-0.099, 0.094) | 0.952 |
|  | Impulse control disorder | 0.001 | (-0.130, 0.131) | 0.993 |
|  | Oppositional defiant disorder | 0.014 | (-0.109, 0.137) | 0.822 |
| Eating and feeding disorders | Avoidant restrictive food intake | -0.077 | (-0.260, 0.106) | 0.410 |
|  | Other eating and feeding disorder | -0.002 | (-0.051, 0.047) | 0.925 |
| Elimination disorders | Encopresis | 0.022 | (-0.012, 0.056) | 0.209 |
|  | Enuresis | 0.022 | (-0.069, 0.113) | 0.634 |
| Gender dysphoria sexual dysfunction | Gender dysphoria | -0.025 | (-0.125, 0.075) | 0.623 |
|  | Paraphilia | -0.005 | (-0.019, 0.009) | 0.461 |
|  | Sexual dysfunction | -0.002 | (-0.029, 0.025) | 0.883 |
| Intentional self-harm/suicidality | Parasuicidality | 0.052 | (-0.049, 0.154) | 0.312 |
|  | Suicidality | 0.134 | (-0.064, 0.332) | 0.184 |
| Mood disorders | Bipolar disorder | -0.021 | (-0.096, 0.055) | 0.593 |
|  | Major depression | -0.2 | (-0.554, 0.154) | 0.268 |
|  | Minor depression | 0.131 | (-0.227, 0.490) | 0.472 |
| Neurocognitive disorders | Catatonia | 0.005 | (-0.023, 0.033) | 0.710 |
|  | Delirium | 0.06 | (-0.064, 0.184) | 0.340 |
|  | Encephalopathy | 0.02 | (-0.024, 0.064) | 0.364 |
| Neurodevelopmental disorders | Academic developmental disorder | 0.082 | (-0.042, 0.205) | 0.195 |
|  | ADHD | 0.414 | (0.007, 0.821) | 0.046 |
|  | Autism spectrum disorder | 0.113 | (-0.099, 0.326) | 0.297 |
|  | Communication motor disorder | 0.057 | (-0.083, 0.197) | 0.428 |
|  | Intellectual disability | 0.175 | (0.004, 0.346) | 0.044 |
| Personality disorders | Personality disorder | -0.01 | (-0.080, 0.060) | 0.775 |
| Psychotic disorders | Psychotic disorder | 0.016 | (-0.057, 0.089) | 0.669 |
|  | Schizoaffective disorder | -0.016 | (-0.038, 0.007) | 0.183 |
|  | Schizophrenia | -0.009 | (-0.052, 0.034) | 0.689 |
| Sleep wake disorders | Hypersomnia | -0.003 | (-0.074, 0.068) | 0.930 |
|  | Insomnia | 0.213 | (0.041, 0.385) | 0.015 |
|  | Parasomnias | 0.062 | (-0.007, 0.130) | 0.076 |
| Standalone symptoms | Anger aggression | -0.04 | (-0.151, 0.070) | 0.475 |
|  | Anxiety symptoms | 0.105 | (0.003, 0.207) | 0.044 |
|  | Attention symptoms | 0.152 | (0.035, 0.269) | 0.011 |
|  | Depressive symptoms | 0.038 | (0.001, 0.075) | 0.047 |
|  | Hallucinations | 0.03 | (-0.031, 0.091) | 0.338 |
| Substance use and dependence | Alcohol | -0.021 | (-0.076, 0.035) | 0.467 |
|  | Opioid related | 0.004 | (-0.032, 0.039) | 0.832 |
|  | Other substances | -0.013 | (-0.090, 0.065) | 0.744 |
|  | THC | 0.049 | (-0.045, 0.142) | 0.308 |
|  | Tobacco | 0.025 | (-0.108, 0.158) | 0.716 |
| Tic disorders | Tic disorder | 0.048 | (-0.057, 0.152) | 0.370 |

**Supp Table 8.** Estimated risk difference in mental health conditions between the COVID-19 positive cohort and COVID-19 negative cohort for youths in Omicron period

| **Category** | **Cluster** | **Risk difference (%)** | **95% CI (%)** | **P value** |
| --- | --- | --- | --- | --- |
| Composite | At least one incident | 0.648 | (0.081, 1.215) | 0.025 |
| Adverse childhood experiences | Emotional abuse | 0.014 | (-0.017, 0.044) | 0.380 |
|  | Neglect | 0.007 | (-0.013, 0.027) | 0.498 |
|  | Physical abuse | -0.003 | (-0.061, 0.055) | 0.916 |
|  | Sexual abuse | 0.013 | (-0.036, 0.062) | 0.608 |
| Anxiety disorders | Anxiety disorder | 0.359 | (-0.039, 0.757) | 0.077 |
|  | OCD | 0.037 | (-0.067, 0.140) | 0.488 |
|  | Somatoform disorder | -0.079 | (-0.193, 0.035) | 0.174 |
|  | Stress disorder | -0.005 | (-0.252, 0.242) | 0.968 |
| Disruptive behavior disorders | Conduct disorder | -0.038 | (-0.111, 0.035) | 0.310 |
|  | Impulse control disorder | 0.003 | (-0.094, 0.099) | 0.959 |
|  | Oppositional defiant disorder | 0.013 | (-0.073, 0.099) | 0.768 |
| Eating and feeding disorders | Avoidant restrictive food intake | -0.123 | (-0.280, 0.035) | 0.126 |
|  | Other eating and feeding disorder | -0.02 | (-0.057, 0.017) | 0.283 |
| Elimination disorders | Encopresis | 0.006 | (-0.024, 0.036) | 0.687 |
|  | Enuresis | 0.014 | (-0.051, 0.080) | 0.670 |
| Gender dysphoria sexual dysfunction | Gender dysphoria | 0.023 | (-0.088, 0.135) | 0.681 |
|  | Paraphilia | -0.018 | (-0.034, -0.002) | 0.024 |
|  | Sexual dysfunction | -0.003 | (-0.025, 0.019) | 0.814 |
| Intentional self-harm/suicidality | Parasuicidality | 0.006 | (-0.082, 0.095) | 0.891 |
|  | Suicidality | 0.028 | (-0.128, 0.184) | 0.723 |
| Mood disorders | Bipolar disorder | -0.053 | (-0.113, 0.007) | 0.082 |
|  | Major depression | -0.162 | (-0.439, 0.114) | 0.250 |
|  | Minor depression | 0.228 | (-0.077, 0.533) | 0.142 |
| Neurocognitive disorders | Catatonia | 0.009 | (-0.017, 0.035) | 0.490 |
|  | Delirium | 0.077 | (-0.023, 0.176) | 0.130 |
|  | Encephalopathy | 0.027 | (-0.014, 0.068) | 0.202 |
| Neurodevelopmental disorders | Academic developmental disorder | 0.029 | (-0.072, 0.129) | 0.578 |
|  | ADHD | 0.266 | (-0.051, 0.583) | 0.100 |
|  | Autism spectrum disorder | 0.018 | (-0.170, 0.206) | 0.850 |
|  | Communication motor disorder | 0.021 | (-0.098, 0.139) | 0.734 |
|  | Intellectual disability | 0.078 | (-0.074, 0.230) | 0.314 |
| Personality disorders | Personality disorder | -0.031 | (-0.093, 0.031) | 0.327 |
| Psychotic disorders | Psychotic disorder | -0.017 | (-0.081, 0.048) | 0.615 |
|  | Schizoaffective disorder | -0.01 | (-0.038, 0.018) | 0.476 |
|  | Schizophrenia | -0.037 | (-0.078, 0.005) | 0.081 |
| Sleep wake disorders | Hypersomnia | 0.023 | (-0.036, 0.081) | 0.450 |
|  | Insomnia | 0.101 | (-0.036, 0.237) | 0.149 |
|  | Parasomnias | 0.044 | (-0.014, 0.103) | 0.138 |
| Standalone symptoms | Anger aggression | -0.006 | (-0.093, 0.082) | 0.900 |
|  | Anxiety symptoms | 0.065 | (-0.027, 0.156) | 0.164 |
|  | Attention symptoms | 0.131 | (0.037, 0.225) | 0.006 |
|  | Depressive symptoms | 0.015 | (-0.015, 0.045) | 0.336 |
|  | Hallucinations | 0.02 | (-0.032, 0.072) | 0.455 |
| Substance use and dependence | Alcohol | -0.025 | (-0.069, 0.019) | 0.267 |
|  | Opioid related | -0.013 | (-0.044, 0.018) | 0.415 |
|  | Other substances | -0.01 | (-0.070, 0.051) | 0.753 |
|  | THC | -0.02 | (-0.093, 0.054) | 0.596 |
|  | Tobacco | 0.016 | (-0.082, 0.114) | 0.743 |
| Tic disorders | Tic disorder | 0.079 | (-0.005, 0.164) | 0.067 |

# Section 8 Supplemental Results: sensitivity analysis for sex

We conducted sensitivity analyses on both cohorts stratified by sex to investigate the potential effect of sex on the risk of mental health conditions. We performed the same PS matching procedure and difference-in-difference method to estimate the risk difference.

## A. Empirical equipoise assessment

**Supp Figure 27.** Preference score distributions of COVID-19 positive and negative groups for female children. A greater convergence of these distributions indicates a higher similarity in the predicted likelihood of being infected between the COVID-19 positive (red) and negative (blue) participants.


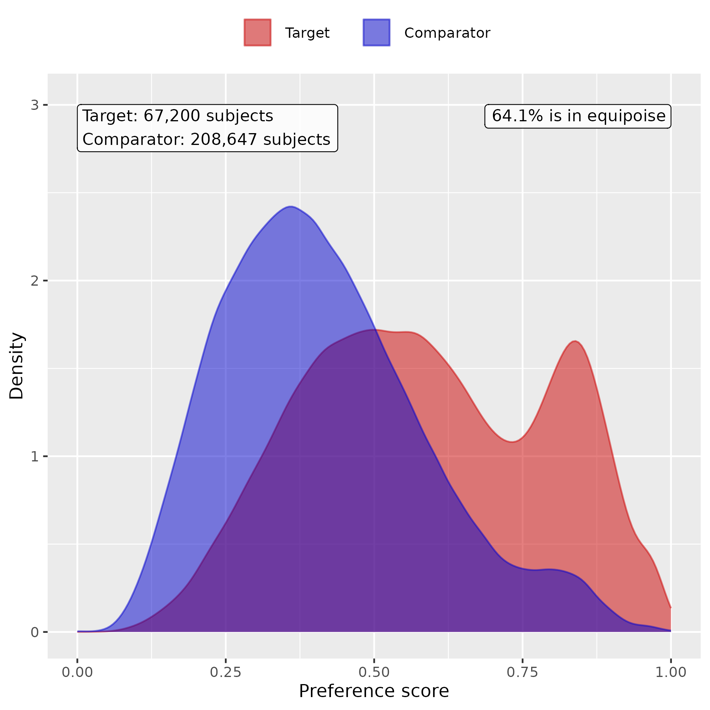


**Supp Figure 28.** Preference score distributions of COVID-19 positive and negative groups for male children. A greater convergence of these distributions indicates a higher similarity in the predicted likelihood of being infected between the COVID-19 positive (red) and negative (blue) participants.


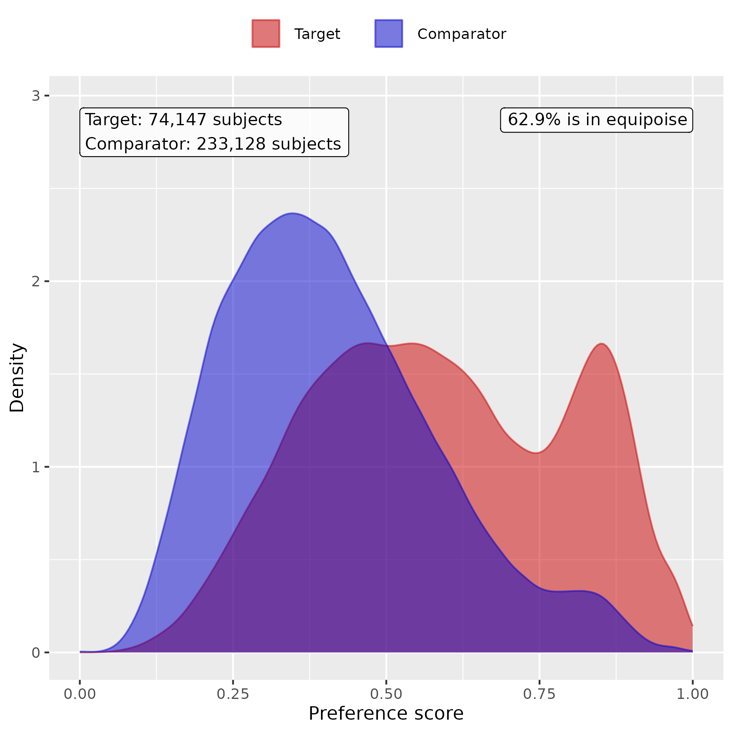


**Supp Figure 29.** Preference score distributions of COVID-19 positive and negative groups for female youths. A greater convergence of these distributions indicates a higher similarity in the predicted likelihood of being infected between the COVID-19 positive (red) and negative (blue) participants.


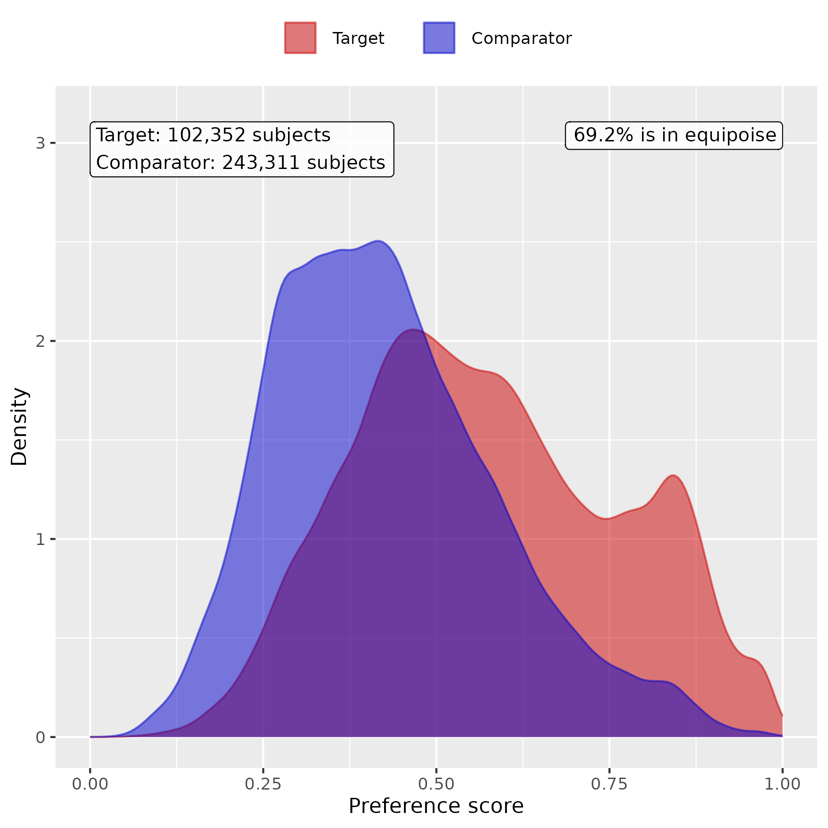


**Supp Figure 30.** Preference score distributions of COVID-19 positive and negative groups for male youths. A greater convergence of these distributions indicates a higher similarity in the predicted likelihood of being infected between the COVID-19 positive (red) and negative (blue) participants.


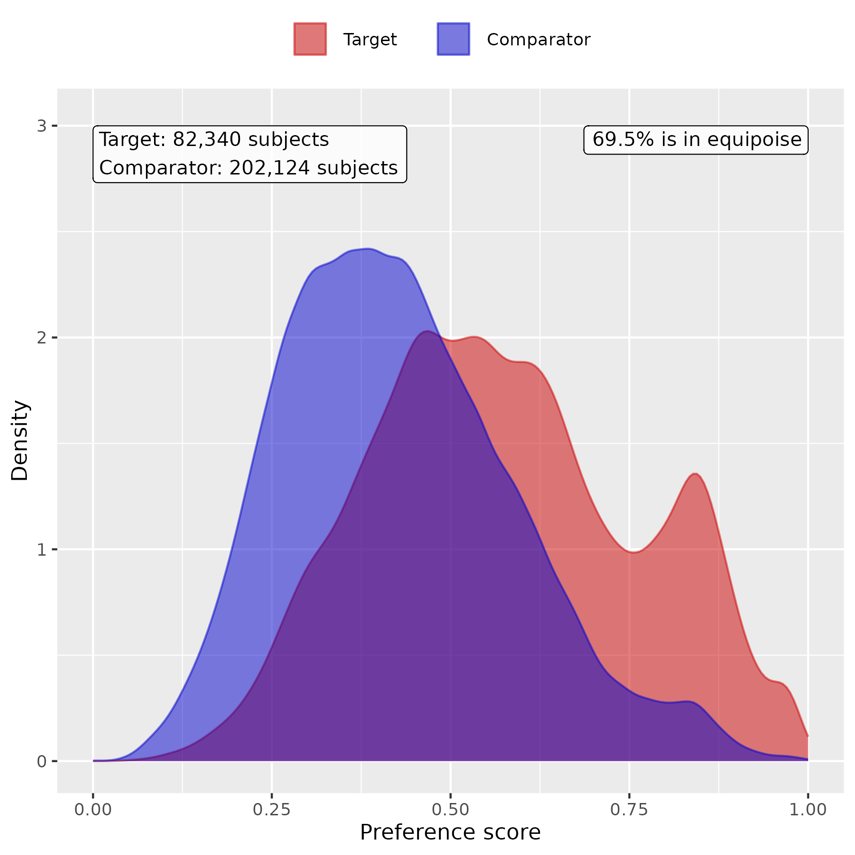


## B. Patient characteristic balance

**Supp Figure 31.** Patient characteristic balance before and after large-scale PS matching with ratio 1:2 for female children. The upper panel displays the top 20 covariates with the largest standardized difference of means before matching, while the lower panel displays the top 20 covariates with the largest standardized difference of means after matching.


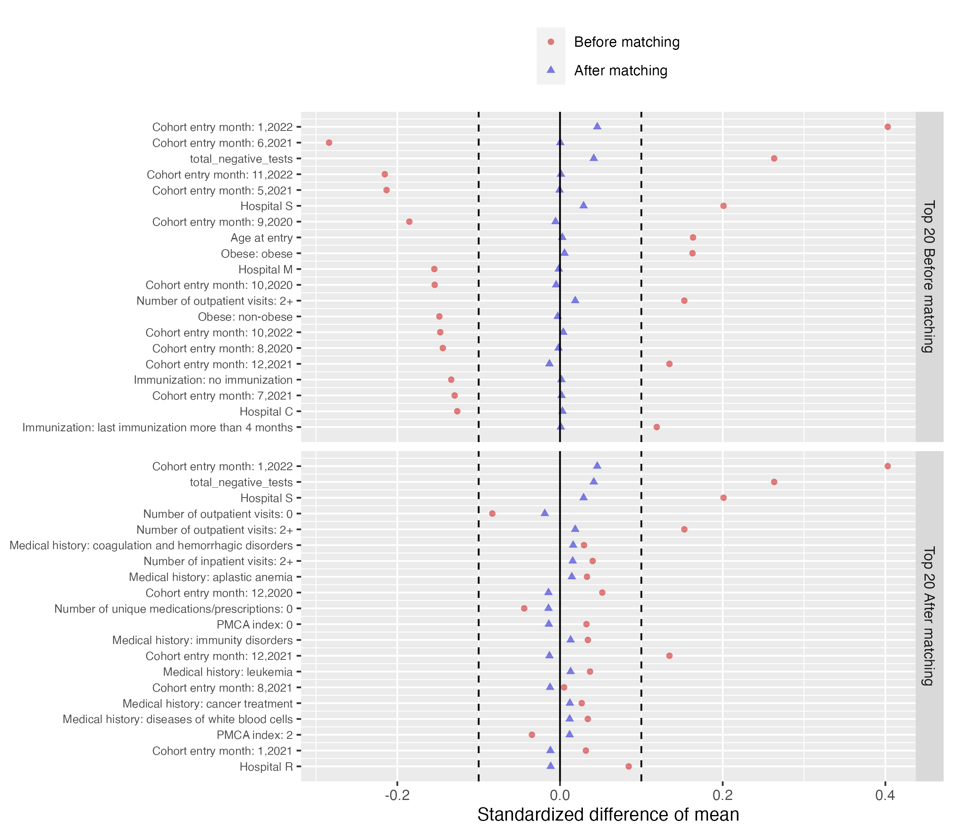


**Supp Figure 32.** Patient characteristic balance before and after large-scale PS matching with ratio 1:2 for male children. The upper panel displays the top 20 covariates with the largest standardized difference of means before matching, while the lower panel displays the top 20 covariates with the largest standardized difference of means after matching.


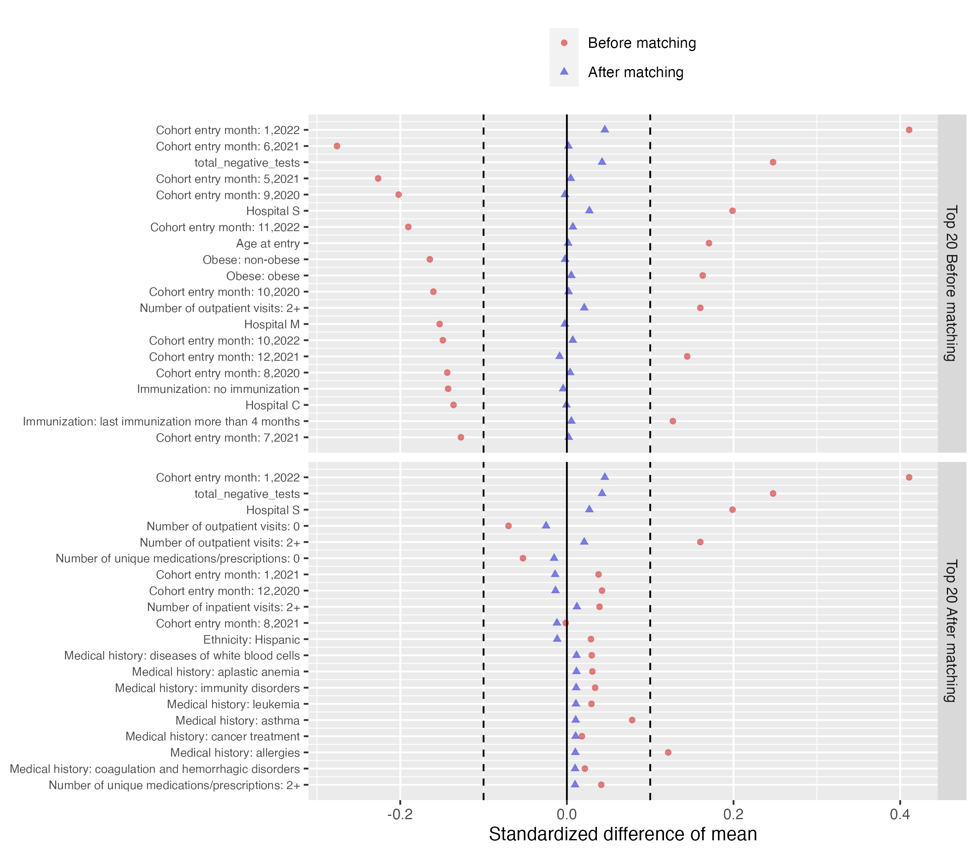


**Supp Figure 33.** Patient characteristic balance before and after large-scale PS matching with ratio 1:2 for female youths. The upper panel displays the top 20 covariates with the largest standardized difference of means before matching, while the lower panel displays the top 20 covariates with the largest standardized difference of means after matching.


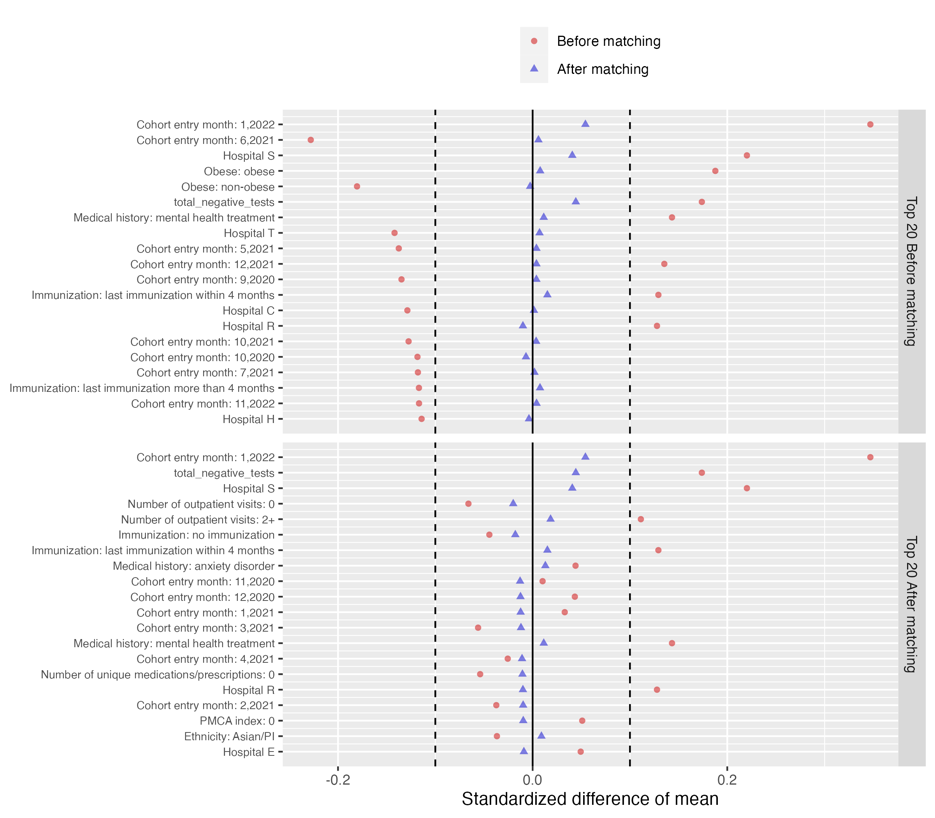


**Supp Figure 34.** Patient characteristic balance before and after large-scale PS matching with ratio 1:2 for male youths. The upper panel displays the top 20 covariates with the largest standardized difference of means before matching, while the lower panel displays the top 20 covariates with the largest standardized difference of means after matching.


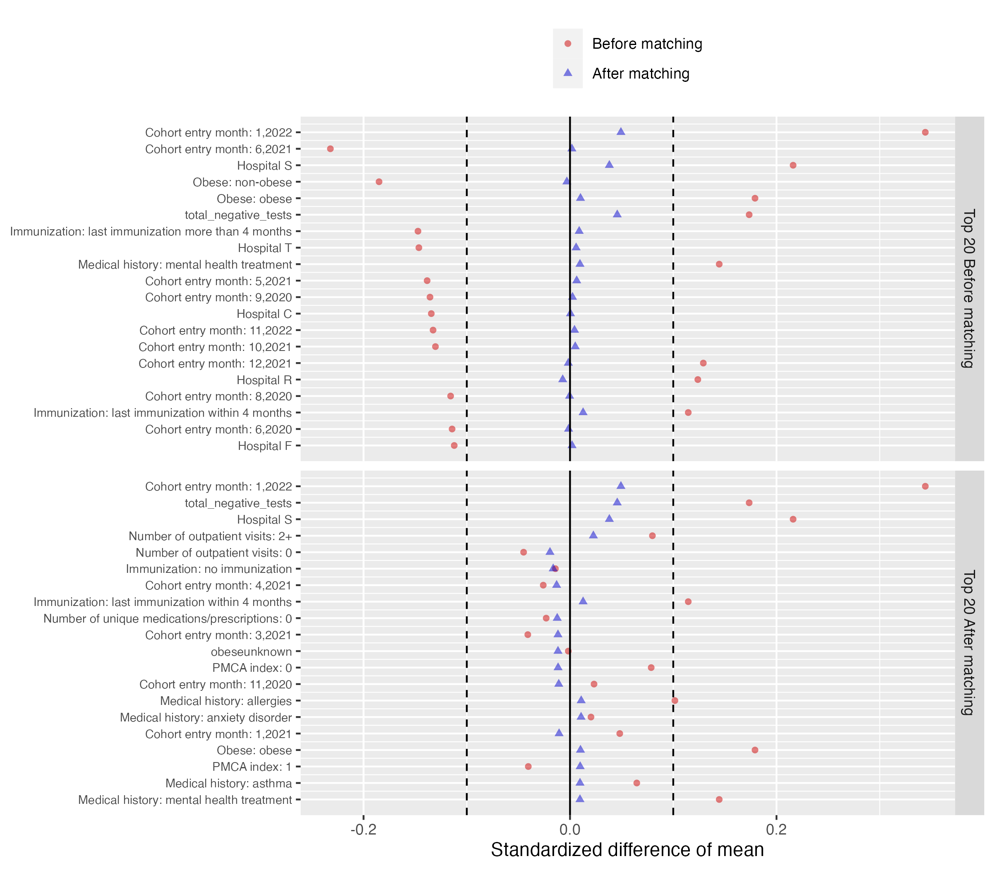


## C. Risk difference of COVID-19 positive group compared to COVID-19 negative group

**Supp Table 9.** Estimated risk difference in mental health conditions between the COVID-19 positive cohort and COVID-19 negative cohort for female children

| **Category** | **Cluster** | **Risk difference (%)** | **95% CI (%)** | **P value** |
| --- | --- | --- | --- | --- |
| Composite | At least one incident | 0.773 | (0.352, 1.194) | <0.001 |
| Adverse childhood experiences | Emotional abuse | -0.008 | (-0.035, 0.020) | 0.583 |
|  | Neglect | 0.007 | (-0.011, 0.026) | 0.444 |
|  | Physical abuse | 0.018 | (-0.026, 0.063) | 0.427 |
|  | Sexual abuse | -0.019 | (-0.061, 0.023) | 0.379 |
| Anxiety disorders | Anxiety disorder | 0.323 | (0.114, 0.531) | 0.002 |
|  | OCD | 0.045 | (-0.006, 0.096) | 0.087 |
|  | Somatoform disorder | 0.048 | (-0.022, 0.117) | 0.180 |
|  | Stress disorder | 0.036 | (-0.133, 0.206) | 0.674 |
| Disruptive behavior disorders | Conduct disorder | -0.015 | (-0.093, 0.062) | 0.699 |
|  | Impulse control disorder | 0.004 | (-0.066, 0.075) | 0.907 |
|  | Oppositional defiant disorder | -0.015 | (-0.077, 0.047) | 0.638 |
| Eating and feeding disorders | Avoidant restrictive food intake | 0.036 | (-0.041, 0.113) | 0.357 |
|  | Other eating and feeding disorder | 0 | (-0.036, 0.037) | 0.986 |
| Elimination disorders | Encopresis | 0.019 | (-0.032, 0.069) | 0.473 |
|  | Enuresis | 0.047 | (-0.057, 0.151) | 0.374 |
| Gender dysphoria sexual dysfunction | Gender dysphoria | 0 | (-0.031, 0.031) | 0.989 |
|  | Paraphilia | -0.002 | (-0.005, 0.002) | 0.281 |
|  | Sexual dysfunction | 0.003 | (-0.002, 0.007) | 0.300 |
| Intentional self-harm/suicidality | Parasuicidality | 0.01 | (-0.029, 0.049) | 0.620 |
|  | Suicidality | 0.022 | (-0.038, 0.082) | 0.476 |
| Mood disorders | Bipolar disorder | 0.014 | (-0.018, 0.047) | 0.394 |
|  | Major depression | -0.041 | (-0.116, 0.035) | 0.292 |
|  | Minor depression | -0.008 | (-0.098, 0.081) | 0.854 |
| Neurocognitive disorders | Catatonia | 0.001 | (-0.008, 0.011) | 0.818 |
|  | Delirium | 0.027 | (-0.012, 0.066) | 0.178 |
|  | Encephalopathy | -0.003 | (-0.033, 0.027) | 0.841 |
| Neurodevelopmental disorders | Academic developmental disorder | 0.085 | (-0.027, 0.197) | 0.136 |
|  | ADHD | 0.039 | (-0.188, 0.265) | 0.737 |
|  | Autism spectrum disorder | 0.046 | (-0.098, 0.189) | 0.533 |
|  | Communication motor disorder | 0.108 | (-0.072, 0.287) | 0.240 |
|  | Intellectual disability | 0.173 | (0.036, 0.309) | 0.013 |
| Personality disorders | Personality disorder | 0.008 | (-0.010, 0.027) | 0.395 |
| Psychotic disorders | Psychotic disorder | -0.003 | (-0.026, 0.021) | 0.833 |
|  | Schizoaffective disorder | NA | NA | NA |
|  | Schizophrenia | -0.004 | (-0.011, 0.004) | 0.344 |
| Sleep wake disorders | Hypersomnia | -0.004 | (-0.036, 0.028) | 0.813 |
|  | Insomnia | 0.103 | (0.014, 0.192) | 0.023 |
|  | Parasomnias | 0.045 | (-0.015, 0.104) | 0.141 |
| Standalone symptoms | Anger aggression | 0.022 | (-0.040, 0.084) | 0.483 |
|  | Anxiety symptoms | 0.058 | (-0.014, 0.130) | 0.116 |
|  | Attention symptoms | 0.016 | (-0.071, 0.102) | 0.726 |
|  | Depressive symptoms | 0.017 | (-0.003, 0.038) | 0.098 |
|  | Hallucinations | 0.003 | (-0.029, 0.034) | 0.864 |
| Substance use and dependence | Alcohol | -0.004 | (-0.011, 0.002) | 0.203 |
|  | Opioid related | 0.006 | (-0.007, 0.018) | 0.370 |
|  | Other substances | 0.015 | (0.001, 0.030) | 0.038 |
|  | THC | 0.001 | (-0.001, 0.003) | 0.446 |
|  | Tobacco | -0.001 | (-0.009, 0.008) | 0.903 |
| Tic disorders | Tic disorder | 0.049 | (-0.012, 0.110) | 0.119 |

**Supp Table 10.** Estimated risk difference in mental health conditions between the COVID-19 positive cohort and COVID-19 negative cohort for male children

| **Category** | **Cluster** | **Risk difference (%)** | **95% CI (%)** | **P value** |
| --- | --- | --- | --- | --- |
| Composite | At least one incident | 0.983 | (0.509, 1.458) | <0.001 |
| Adverse childhood experiences | Emotional abuse | -0.012 | (-0.037, 0.013) | 0.360 |
|  | Neglect | 0.007 | (-0.008, 0.023) | 0.358 |
|  | Physical abuse | -0.003 | (-0.048, 0.042) | 0.897 |
|  | Sexual abuse | 0.02 | (-0.006, 0.046) | 0.123 |
| Anxiety disorders | Anxiety disorder | 0.293 | (0.091, 0.494) | 0.004 |
|  | OCD | 0.043 | (-0.006, 0.093) | 0.087 |
|  | Somatoform disorder | 0.033 | (-0.031, 0.098) | 0.308 |
|  | Stress disorder | 0.197 | (0.034, 0.360) | 0.018 |
| Disruptive behavior disorders | Conduct disorder | 0 | (-0.105, 0.105) | 0.999 |
|  | Impulse control disorder | -0.079 | (-0.180, 0.021) | 0.122 |
|  | Oppositional defiant disorder | 0.075 | (-0.014, 0.163) | 0.097 |
| Eating and feeding disorders | Avoidant restrictive food intake | 0.012 | (-0.065, 0.090) | 0.760 |
|  | Other eating and feeding disorder | 0 | (-0.042, 0.043) | 0.986 |
| Elimination disorders | Encopresis | 0.016 | (-0.046, 0.077) | 0.617 |
|  | Enuresis | 0.021 | (-0.091, 0.134) | 0.708 |
| Gender dysphoria sexual dysfunction | Gender dysphoria | -0.009 | (-0.032, 0.015) | 0.486 |
|  | Paraphilia | 0.001 | (-0.001, 0.003) | 0.447 |
|  | Sexual dysfunction | -0.003 | (-0.008, 0.002) | 0.307 |
| Intentional self-harm/suicidality | Parasuicidality | -0.005 | (-0.044, 0.034) | 0.820 |
|  | Suicidality | 0.014 | (-0.034, 0.063) | 0.555 |
| Mood disorders | Bipolar disorder | 0.042 | (0.012, 0.071) | 0.006 |
|  | Major depression | -0.011 | (-0.069, 0.047) | 0.706 |
|  | Minor depression | 0.034 | (-0.044, 0.111) | 0.393 |
| Neurocognitive disorders | Catatonia | 0 | (-0.008, 0.007) | 0.905 |
|  | Delirium | 0.072 | (0.029, 0.116) | 0.001 |
|  | Encephalopathy | 0.009 | (-0.021, 0.040) | 0.551 |
| Neurodevelopmental disorders | Academic developmental disorder | -0.016 | (-0.134, 0.103) | 0.795 |
|  | ADHD | 0.351 | (0.036, 0.667) | 0.029 |
|  | Autism spectrum disorder | 0.218 | (-0.015, 0.451) | 0.067 |
|  | Communication motor disorder | 0.255 | (0.021, 0.490) | 0.033 |
|  | Intellectual disability | 0.077 | (-0.080, 0.234) | 0.335 |
| Personality disorders | Personality disorder | -0.003 | (-0.024, 0.019) | 0.786 |
| Psychotic disorders | Psychotic disorder | 0.006 | (-0.019, 0.032) | 0.616 |
|  | Schizoaffective disorder | 0.003 | (-0.001, 0.007) | 0.102 |
|  | Schizophrenia | 0.003 | (-0.004, 0.010) | 0.431 |
| Sleep wake disorders | Hypersomnia | 0.001 | (-0.033, 0.034) | 0.974 |
|  | Insomnia | -0.045 | (-0.141, 0.051) | 0.356 |
|  | Parasomnias | 0.035 | (-0.032, 0.103) | 0.307 |
| Standalone symptoms | Anger aggression | 0.046 | (-0.038, 0.130) | 0.285 |
|  | Anxiety symptoms | 0.058 | (-0.010, 0.126) | 0.096 |
|  | Attention symptoms | 0.002 | (-0.099, 0.102) | 0.975 |
|  | Depressive symptoms | -0.005 | (-0.022, 0.013) | 0.586 |
|  | Hallucinations | 0.006 | (-0.019, 0.032) | 0.630 |
| Substance use and dependence | Alcohol | 0 | (-0.005, 0.006) | 0.896 |
|  | Opioid related | -0.001 | (-0.011, 0.009) | 0.902 |
|  | Other substances | -0.003 | (-0.021, 0.016) | 0.780 |
|  | THC | 0.001 | (-0.001, 0.003) | 0.447 |
|  | Tobacco | -0.002 | (-0.008, 0.003) | 0.397 |
| Tic disorders | Tic disorder | 0.053 | (-0.037, 0.143) | 0.250 |

**Supp Table 11.** Estimated risk difference in mental health conditions between the COVID-19 positive cohort and COVID-19 negative cohort for female youths

| **Category** | **Cluster** | **Risk difference (%)** | **95% CI (%)** | **P value** |
| --- | --- | --- | --- | --- |
| Composite | At least one incident | 0.716 | (0.280, 1.152) | 0.001 |
| Adverse childhood experiences | Emotional abuse | 0.002 | (-0.019, 0.022) | 0.878 |
|  | Neglect | -0.002 | (-0.017, 0.013) | 0.802 |
|  | Physical abuse | 0.018 | (-0.032, 0.068) | 0.489 |
|  | Sexual abuse | 0.037 | (-0.010, 0.085) | 0.123 |
| Anxiety disorders | Anxiety disorder | 0.27 | (-0.053, 0.593) | 0.102 |
|  | OCD | 0.008 | (-0.070, 0.086) | 0.836 |
|  | Somatoform disorder | -0.025 | (-0.116, 0.065) | 0.585 |
|  | Stress disorder | 0.038 | (-0.163, 0.239) | 0.709 |
| Disruptive behavior disorders | Conduct disorder | -0.017 | (-0.063, 0.029) | 0.457 |
|  | Impulse control disorder | -0.024 | (-0.088, 0.040) | 0.456 |
|  | Oppositional defiant disorder | -0.017 | (-0.075, 0.040) | 0.555 |
| Eating and feeding disorders | Avoidant restrictive food intake | -0.108 | (-0.244, 0.029) | 0.122 |
|  | Other eating and feeding disorder | 0.004 | (-0.025, 0.033) | 0.782 |
| Elimination disorders | Encopresis | -0.004 | (-0.020, 0.012) | 0.607 |
|  | Enuresis | 0.024 | (-0.019, 0.067) | 0.269 |
| Gender dysphoria sexual dysfunction | Gender dysphoria | -0.05 | (-0.129, 0.029) | 0.213 |
|  | Paraphilia | -0.006 | (-0.016, 0.004) | 0.221 |
|  | Sexual dysfunction | 0 | (-0.016, 0.016) | 0.976 |
| Intentional self-harm/suicidality | Parasuicidality | 0.042 | (-0.031, 0.115) | 0.265 |
|  | Suicidality | 0.11 | (-0.022, 0.242) | 0.101 |
| Mood disorders | Bipolar disorder | -0.02 | (-0.070, 0.030) | 0.433 |
|  | Major depression | -0.216 | (-0.466, 0.034) | 0.090 |
|  | Minor depression | 0.309 | (0.062, 0.556) | 0.014 |
| Neurocognitive disorders | Catatonia | -0.005 | (-0.020, 0.010) | 0.505 |
|  | Delirium | 0.128 | (0.054, 0.202) | <0.001 |
|  | Encephalopathy | 0.009 | (-0.018, 0.037) | 0.499 |
| Neurodevelopmental disorders | Academic developmental disorder | 0.025 | (-0.042, 0.091) | 0.467 |
|  | ADHD | 0.191 | (-0.010, 0.392) | 0.063 |
|  | Autism spectrum disorder | 0.038 | (-0.051, 0.127) | 0.399 |
|  | Communication motor disorder | 0.058 | (-0.013, 0.130) | 0.111 |
|  | Intellectual disability | -0.003 | (-0.095, 0.090) | 0.957 |
| Personality disorders | Personality disorder | -0.043 | (-0.095, 0.009) | 0.107 |
| Psychotic disorders | Psychotic disorder | -0.013 | (-0.059, 0.033) | 0.584 |
|  | Schizoaffective disorder | 0.002 | (-0.017, 0.021) | 0.823 |
|  | Schizophrenia | -0.002 | (-0.026, 0.021) | 0.838 |
| Sleep wake disorders | Hypersomnia | 0.002 | (-0.044, 0.048) | 0.933 |
|  | Insomnia | 0.041 | (-0.066, 0.147) | 0.452 |
|  | Parasomnias | 0.043 | (0.001, 0.085) | 0.042 |
| Standalone symptoms | Anger aggression | 0.011 | (-0.044, 0.067) | 0.694 |
|  | Anxiety symptoms | 0.073 | (0.007, 0.139) | 0.031 |
|  | Attention symptoms | 0.075 | (0.006, 0.145) | 0.033 |
|  | Depressive symptoms | 0.02 | (-0.008, 0.047) | 0.157 |
|  | Hallucinations | 0.014 | (-0.027, 0.055) | 0.500 |
| Substance use and dependence | Alcohol | -0.005 | (-0.040, 0.030) | 0.786 |
|  | Opioid related | -0.002 | (-0.023, 0.020) | 0.886 |
|  | Other substances | -0.016 | (-0.062, 0.029) | 0.480 |
|  | THC | -0.006 | (-0.061, 0.049) | 0.829 |
|  | Tobacco | 0.014 | (-0.064, 0.091) | 0.733 |
| Tic disorders | Tic disorder | 0 | (-0.056, 0.056) | 0.997 |

**Supp Table 12.** Estimated risk difference in mental health conditions between the COVID-19 positive cohort and COVID-19 negative cohort for male youths

| **Category** | **Cluster** | **Risk difference (%)** | **95% CI (%)** | **P value** |
| --- | --- | --- | --- | --- |
| Composite | At least one incident | 0.899 | (0.453, 1.346) | <0.001 |
| Adverse childhood experiences | Emotional abuse | 0.027 | (0.007, 0.047) | 0.008 |
|  | Neglect | 0.009 | (-0.006, 0.024) | 0.265 |
|  | Physical abuse | 0.033 | (0.001, 0.066) | 0.044 |
|  | Sexual abuse | 0.013 | (-0.005, 0.031) | 0.152 |
| Anxiety disorders | Anxiety disorder | 0.351 | (0.087, 0.614) | 0.009 |
|  | OCD | 0.037 | (-0.038, 0.111) | 0.337 |
|  | Somatoform disorder | -0.038 | (-0.109, 0.032) | 0.287 |
|  | Stress disorder | 0.185 | (0.010, 0.360) | 0.038 |
| Disruptive behavior disorders | Conduct disorder | -0.003 | (-0.074, 0.068) | 0.935 |
|  | Impulse control disorder | 0.057 | (-0.036, 0.149) | 0.229 |
|  | Oppositional defiant disorder | 0.057 | (-0.028, 0.142) | 0.186 |
| Eating and feeding disorders | Avoidant restrictive food intake | -0.029 | (-0.113, 0.054) | 0.488 |
|  | Other eating and feeding disorder | 0.001 | (-0.025, 0.027) | 0.950 |
| Elimination disorders | Encopresis | 0.034 | (0.005, 0.063) | 0.023 |
|  | Enuresis | 0.013 | (-0.049, 0.074) | 0.687 |
| Gender dysphoria sexual dysfunction | Gender dysphoria | 0.003 | (-0.058, 0.063) | 0.934 |
|  | Paraphilia | -0.001 | (-0.010, 0.007) | 0.764 |
|  | Sexual dysfunction | 0.006 | (-0.012, 0.024) | 0.524 |
| Intentional self-harm/suicidality | Parasuicidality | -0.017 | (-0.066, 0.031) | 0.481 |
|  | Suicidality | 0.118 | (0.023, 0.214) | 0.015 |
| Mood disorders | Bipolar disorder | 0.018 | (-0.025, 0.061) | 0.419 |
|  | Major depression | 0.02 | (-0.157, 0.197) | 0.823 |
|  | Minor depression | 0.106 | (-0.075, 0.288) | 0.251 |
| Neurocognitive disorders | Catatonia | 0.013 | (-0.008, 0.035) | 0.214 |
|  | Delirium | 0.032 | (-0.046, 0.109) | 0.423 |
|  | Encephalopathy | 0.023 | (-0.010, 0.057) | 0.170 |
| Neurodevelopmental disorders | Academic developmental disorder | 0.073 | (-0.018, 0.163) | 0.116 |
|  | ADHD | 0.513 | (0.215, 0.812) | <0.001 |
|  | Autism spectrum disorder | 0.09 | (-0.088, 0.269) | 0.322 |
|  | Communication motor disorder | 0.048 | (-0.060, 0.155) | 0.384 |
|  | Intellectual disability | 0.128 | (-0.005, 0.261) | 0.058 |
| Personality disorders | Personality disorder | -0.016 | (-0.049, 0.018) | 0.364 |
| Psychotic disorders | Psychotic disorder | 0.007 | (-0.044, 0.058) | 0.793 |
|  | Schizoaffective disorder | -0.01 | (-0.031, 0.011) | 0.363 |
|  | Schizophrenia | -0.013 | (-0.049, 0.024) | 0.501 |
| Sleep wake disorders | Hypersomnia | 0.021 | (-0.025, 0.068) | 0.369 |
|  | Insomnia | 0.241 | (0.133, 0.349) | <0.001 |
|  | Parasomnias | 0.004 | (-0.044, 0.052) | 0.871 |
| Standalone symptoms | Anger aggression | 0.032 | (-0.048, 0.112) | 0.434 |
|  | Anxiety symptoms | 0.066 | (0.002, 0.130) | 0.042 |
|  | Attention symptoms | 0.056 | (-0.020, 0.131) | 0.149 |
|  | Depressive symptoms | 0.025 | (0.005, 0.044) | 0.013 |
|  | Hallucinations | 0.019 | (-0.017, 0.055) | 0.303 |
| Substance use and dependence | Alcohol | -0.009 | (-0.047, 0.028) | 0.623 |
|  | Opioid related | -0.001 | (-0.027, 0.024) | 0.914 |
|  | Other substances | -0.013 | (-0.065, 0.039) | 0.623 |
|  | THC | -0.044 | (-0.106, 0.018) | 0.164 |
|  | Tobacco | 0.026 | (-0.049, 0.101) | 0.500 |
| Tic disorders | Tic disorder | 0.06 | (-0.014, 0.134) | 0.109 |

# Section 9 Supplemental Results: sensitivity analysis for ethnicity

We conducted sensitivity analyses on both cohorts stratified by ethnicity (i.e., Asian/PI, Black/AA, Hispanic, and White) to investigate the potential effect of race on the risk of mental health conditions. We performed the same PS matching procedure and difference-in-difference method to estimate the risk difference.

## A. Empirical equipoise assessment

**Supp Figure 35.** Preference score distributions of COVID-19 positive and negative groups for children in Asian/PI group. A greater convergence of these distributions indicates a higher similarity in the predicted likelihood of being infected between the COVID-19 positive (red) and negative (blue) participants.


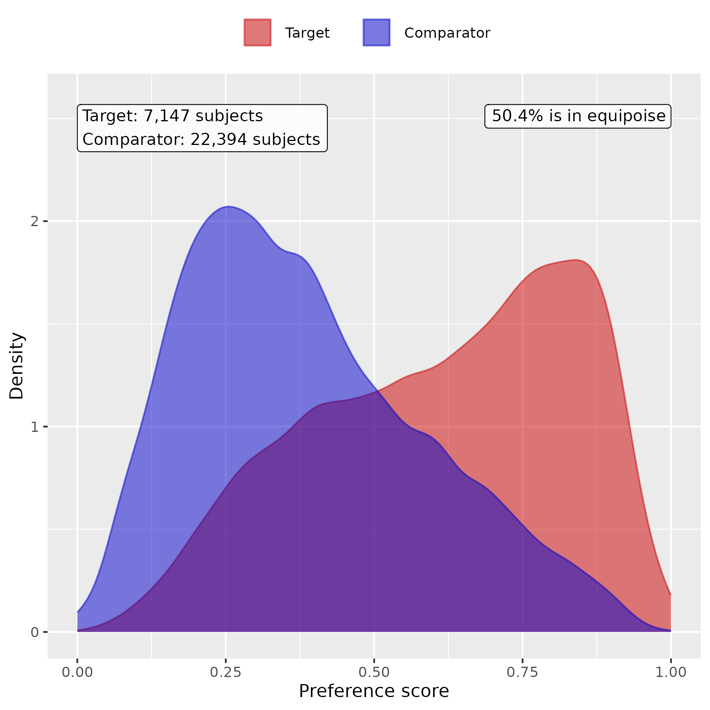


**Supp Figure 36.** Preference score distributions of COVID-19 positive and negative groups for children in Black/AA group. A greater convergence of these distributions indicates a higher similarity in the predicted likelihood of being infected between the COVID-19 positive (red) and negative (blue) participants.


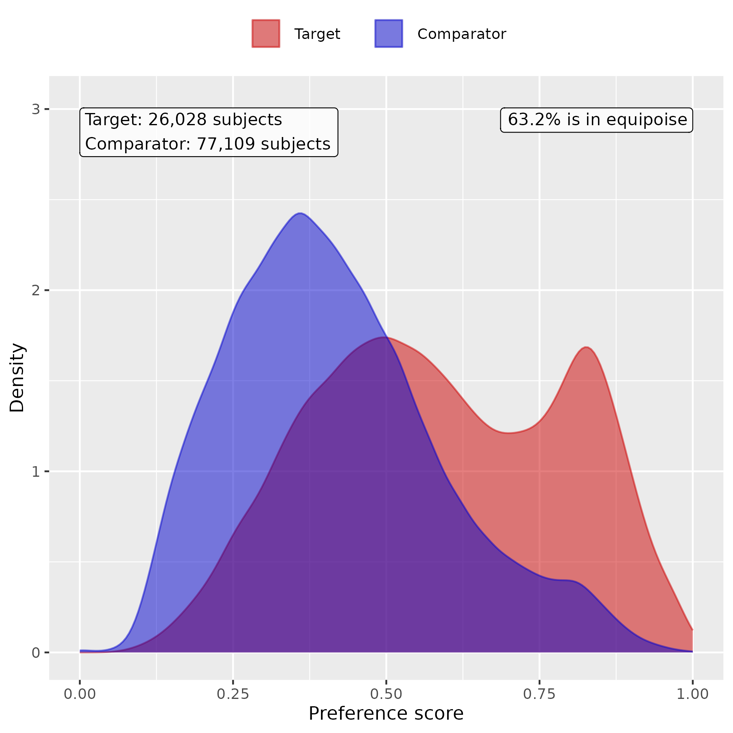


**Supp Figure 37.** Preference score distributions of COVID-19 positive and negative groups for children in Hispanic group. A greater convergence of these distributions indicates a higher similarity in the predicted likelihood of being infected between the COVID-19 positive (red) and negative (blue) participants.


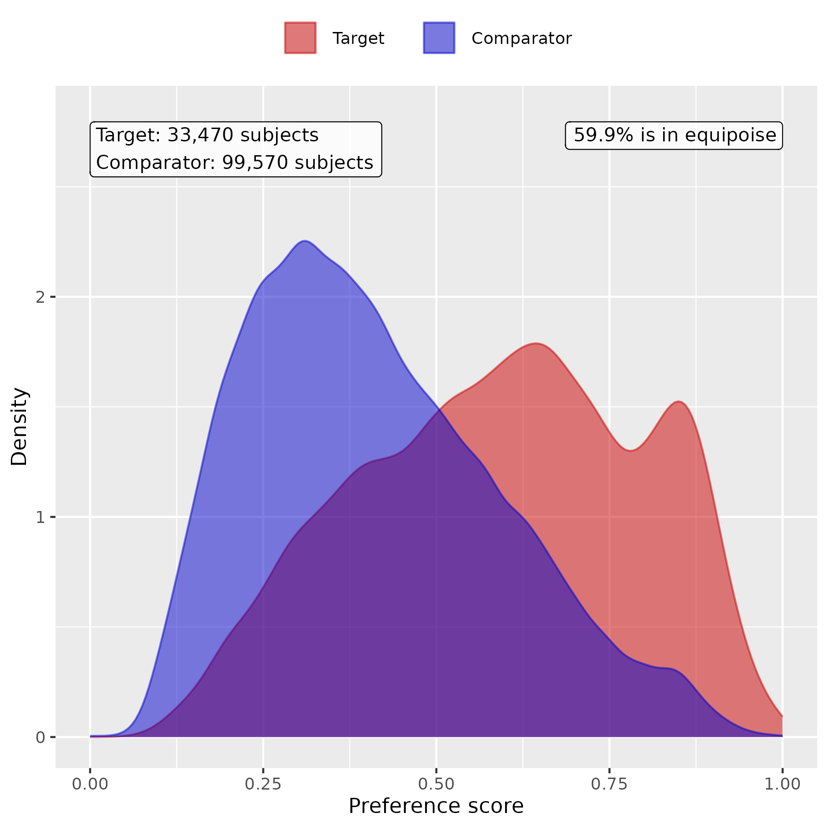


**Supp Figure 38.** Preference score distributions of COVID-19 positive and negative groups for children in White group. A greater convergence of these distributions indicates a higher similarity in the predicted likelihood of being infected between the COVID-19 positive (red) and negative (blue) participants.


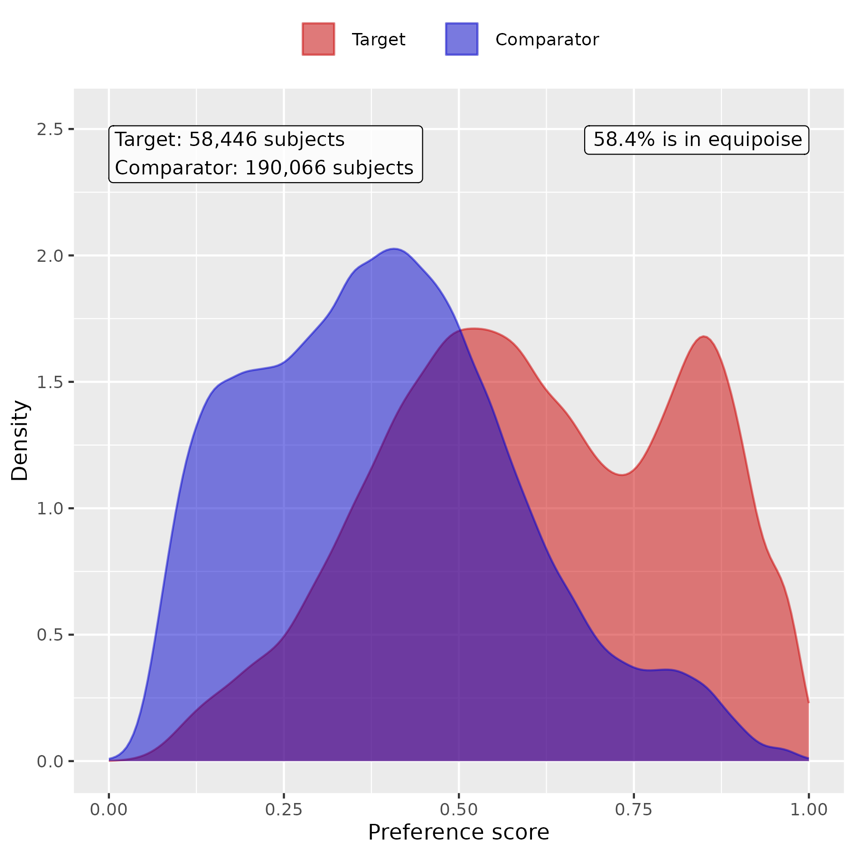


**Supp Figure 39.** Preference score distributions of COVID-19 positive and negative groups for youths in Asian/PI group. A greater convergence of these distributions indicates a higher similarity in the predicted likelihood of being infected between the COVID-19 positive (red) and negative (blue) participants.


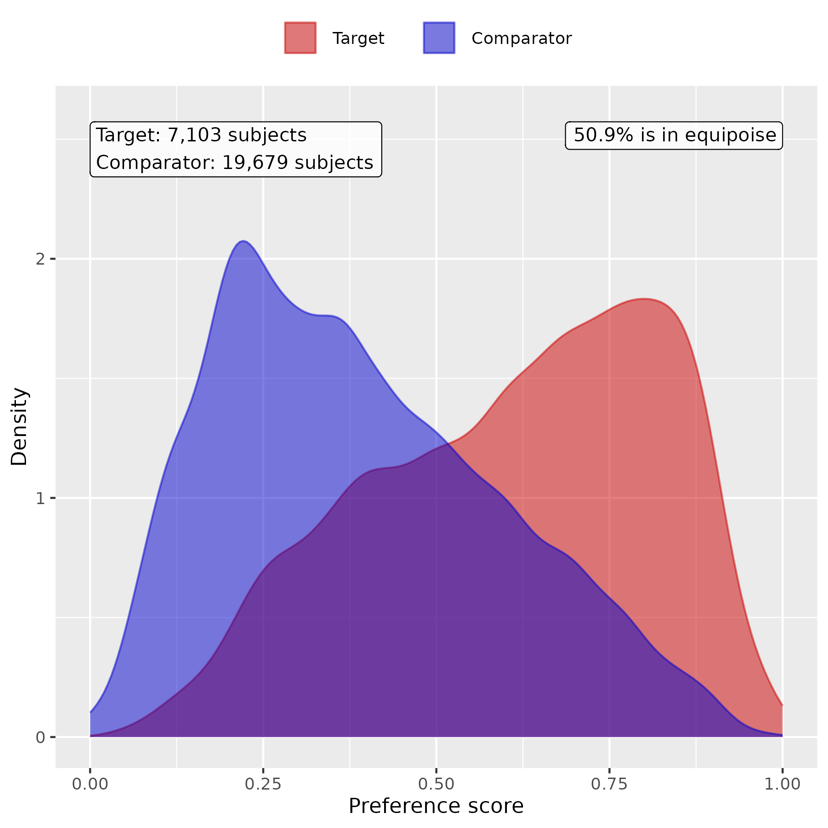


**Supp Figure 40.** Preference score distributions of COVID-19 positive and negative groups for youths in Black/AA group. A greater convergence of these distributions indicates a higher similarity in the predicted likelihood of being infected between the COVID-19 positive (red) and negative (blue) participants.


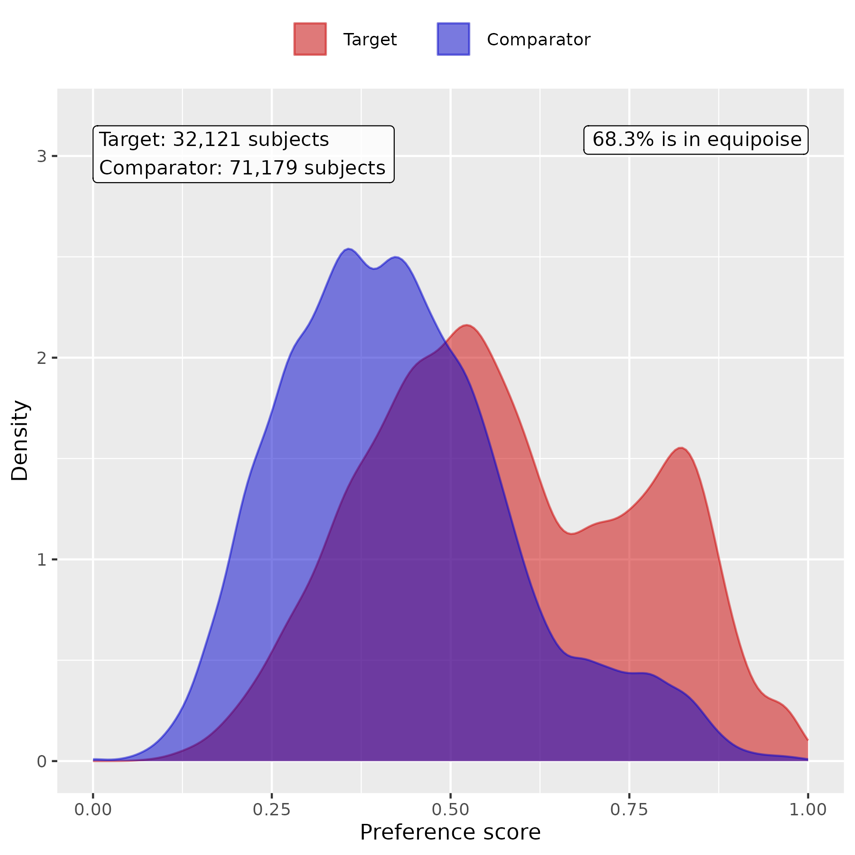


**Supp Figure 41.** Preference score distributions of COVID-19 positive and negative groups for youths in Hispanic group. A greater convergence of these distributions indicates a higher similarity in the predicted likelihood of being infected between the COVID-19 positive (red) and negative (blue) participants.


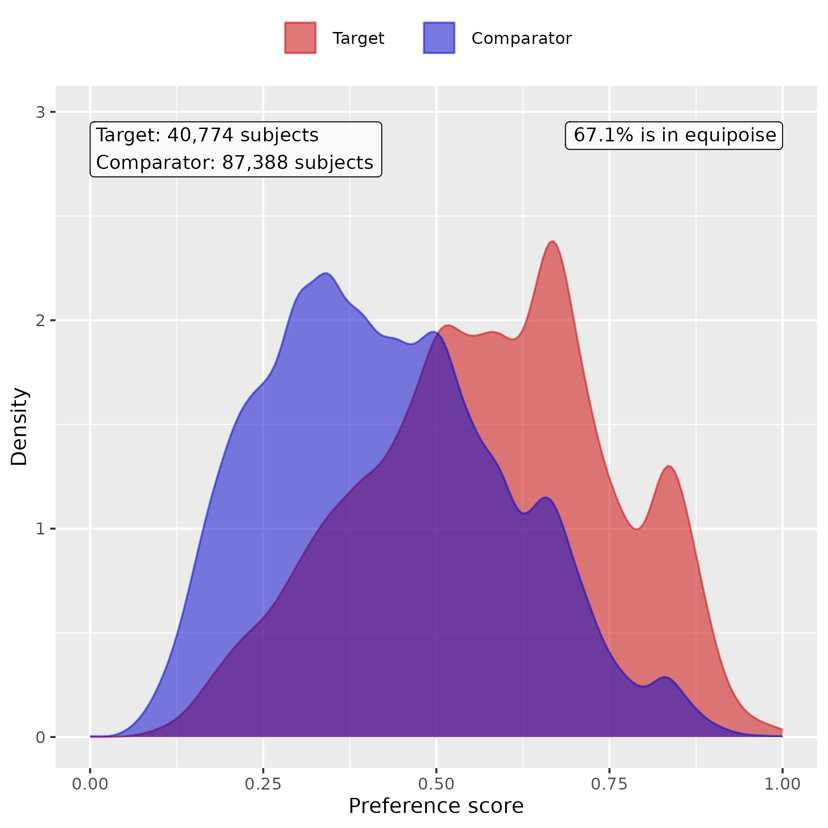


**Supp Figure 42.** Preference score distributions of COVID-19 positive and negative groups for youths in White group. A greater convergence of these distributions indicates a higher similarity in the predicted likelihood of being infected between the COVID-19 positive (red) and negative (blue) participants.


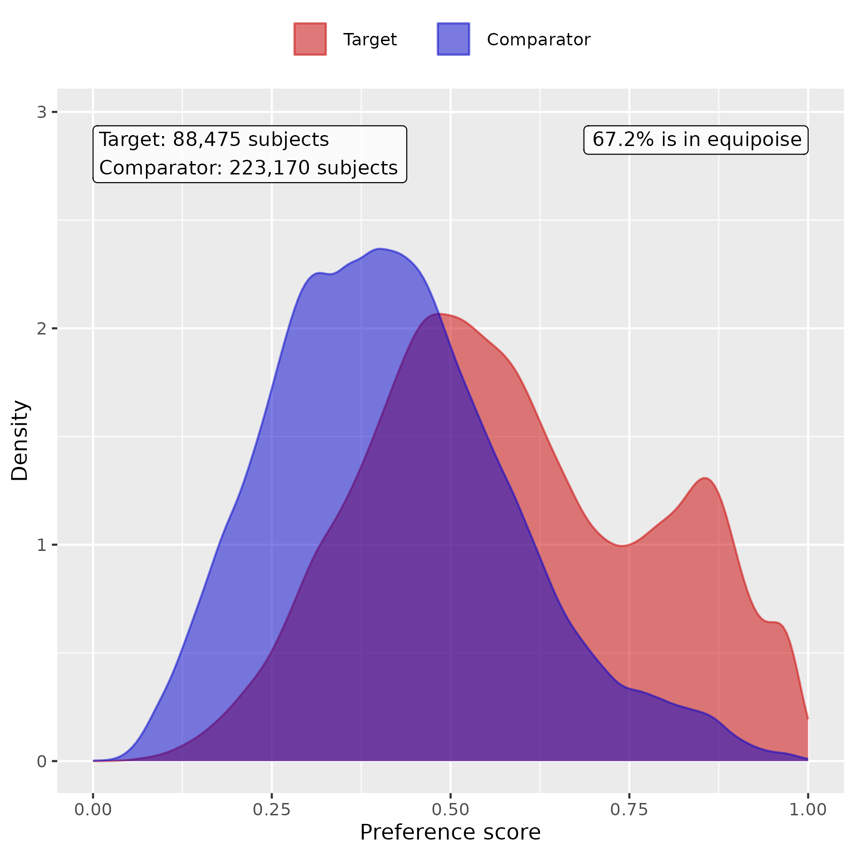


## B. Patient characteristic balance

**Supp Figure 43.** Patient characteristic balance before and after large-scale PS matching with ratio 1:2 for children in Asian/PI group. The upper panel displays the top 20 covariates with the largest standardized difference of means before matching, while the lower panel displays the top 20 covariates with the largest standardized difference of means after matching.


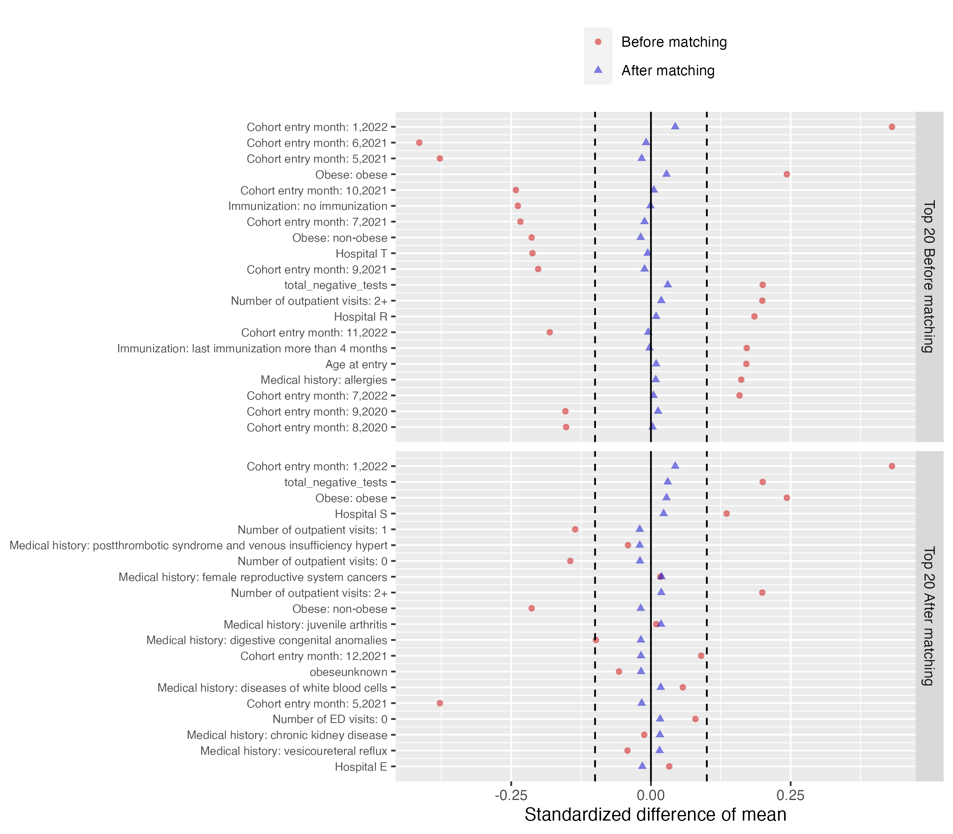


**Supp Figure 44.** Patient characteristic balance before and after large-scale PS matching with ratio 1:2 for children in Black/AA group. The upper panel displays the top 20 covariates with the largest standardized difference of means before matching, while the lower panel displays the top 20 covariates with the largest standardized difference of means after matching.


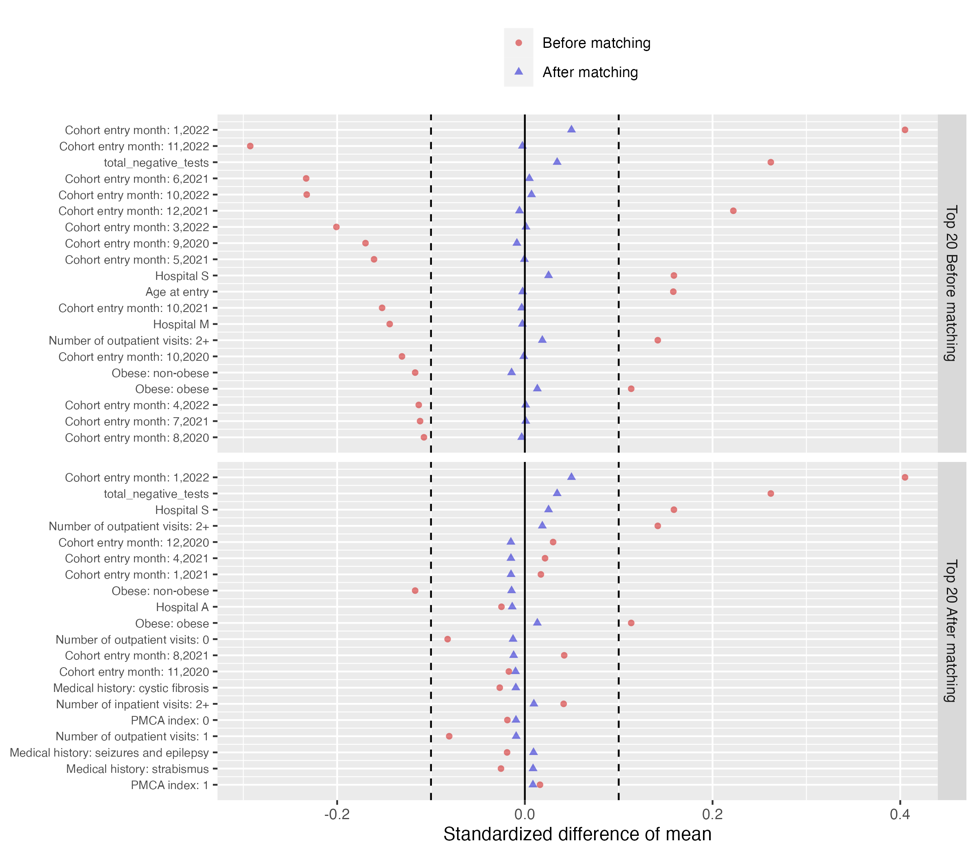


**Supp Figure 45,** Patient characteristic balance before and after large-scale PS matching with ratio 1:2 for children in Hispanic group. The upper panel displays the top 20 covariates with the largest standardized difference of means before matching, while the lower panel displays the top 20 covariates with the largest standardized difference of means after matching.


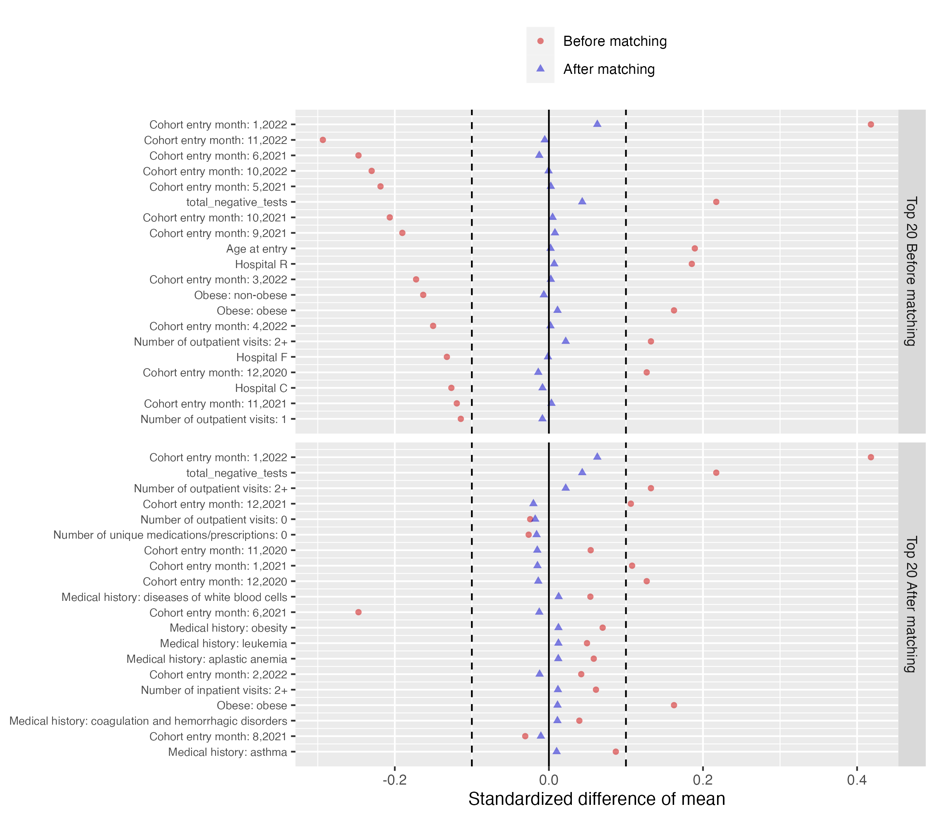


**Supp Figure 46.** Patient characteristic balance before and after large-scale PS matching with ratio 1:2 for children in White group. The upper panel displays the top 20 covariates with the largest standardized difference of means before matching, while the lower panel displays the top 20 covariates with the largest standardized difference of means after matching.


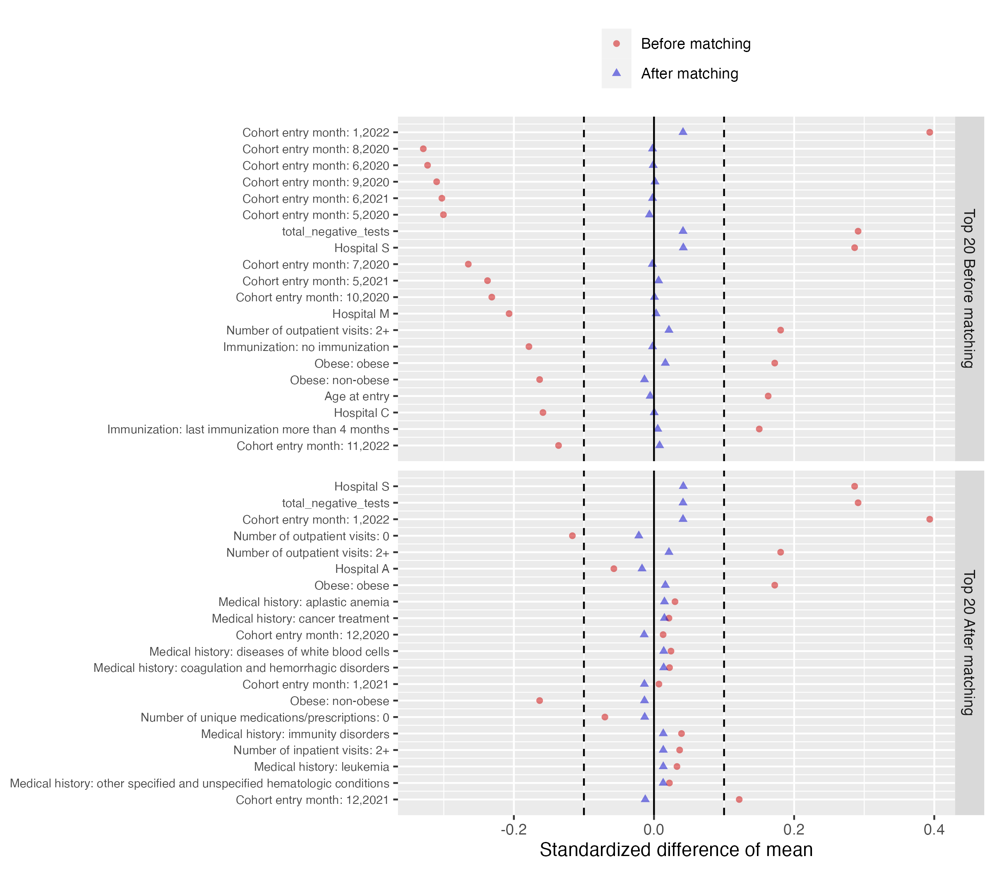


**Supp Figure 47.** Patient characteristic balance before and after large-scale PS matching with ratio 1:2 for youths in Asian/PI group. The upper panel displays the top 20 covariates with the largest standardized difference of means before matching, while the lower panel displays the top 20 covariates with the largest standardized difference of means after matching.


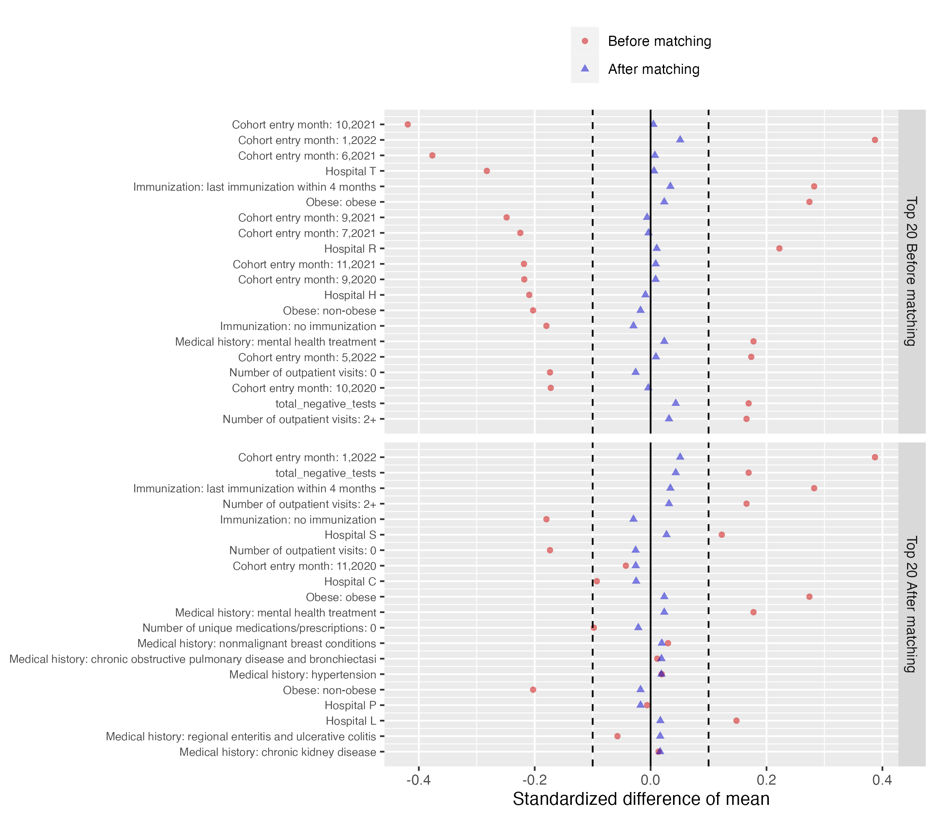


**Supp Figure 48.** Patient characteristic balance before and after large-scale PS matching with ratio 1:2 for youths in Black/AA group. The upper panel displays the top 20 covariates with the largest standardized difference of means before matching, while the lower panel displays the top 20 covariates with the largest standardized difference of means after matching.


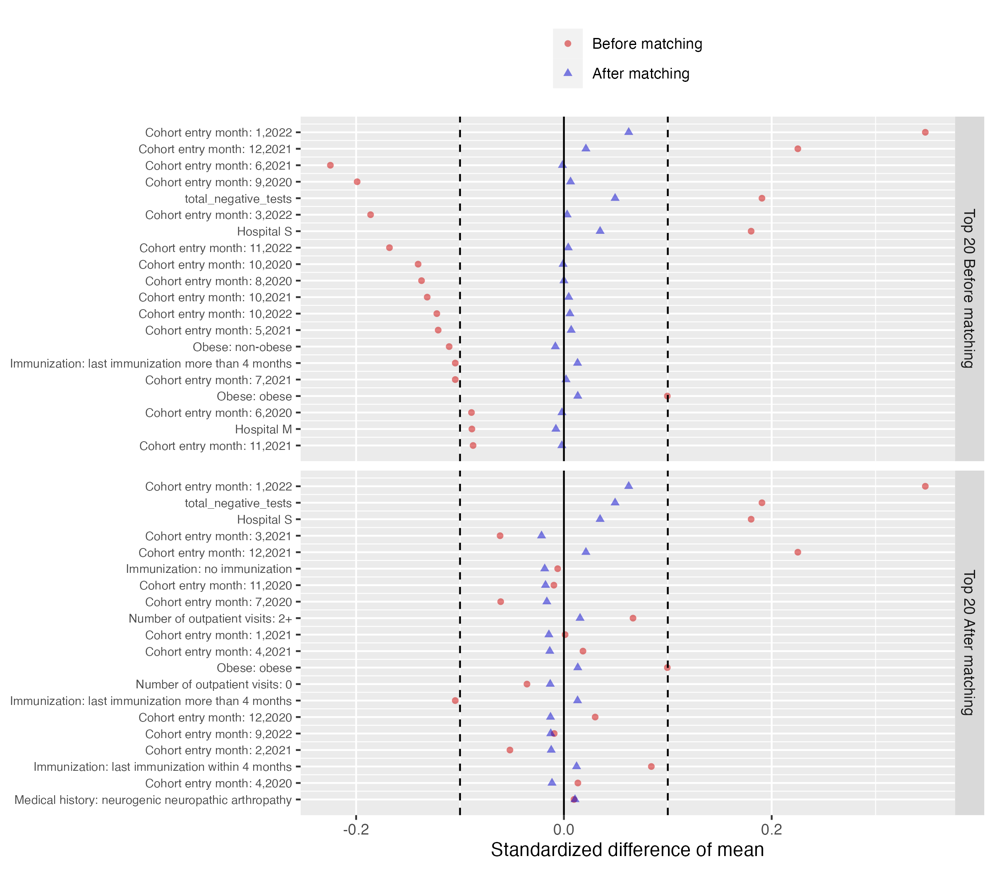


**Supp Figure 49.** Patient characteristic balance before and after large-scale PS matching with ratio 1:2 for youths in Hispanic group. The upper panel displays the top 20 covariates with the largest standardized difference of means before matching, while the lower panel displays the top 20 covariates with the largest standardized difference of means after matching.


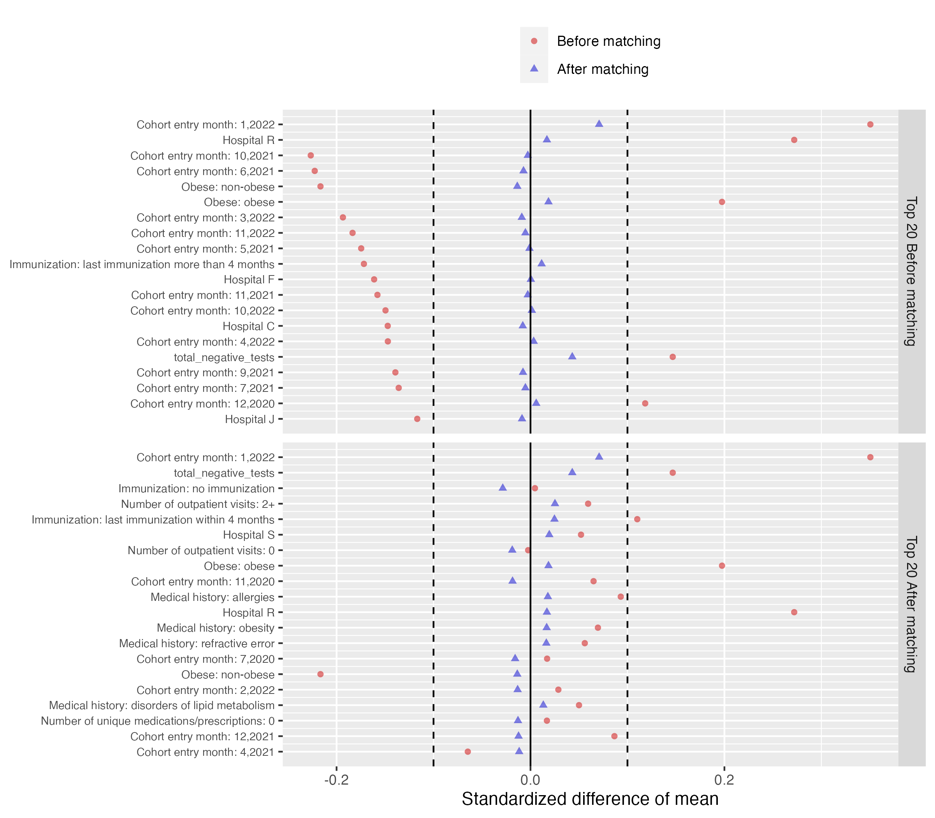


**Supp Figure 50.** Patient characteristic balance before and after large-scale PS matching with ratio 1:2 for youths in White group. The upper panel displays the top 20 covariates with the largest standardized difference of means before matching, while the lower panel displays the top 20 covariates with the largest standardized difference of means after matching.


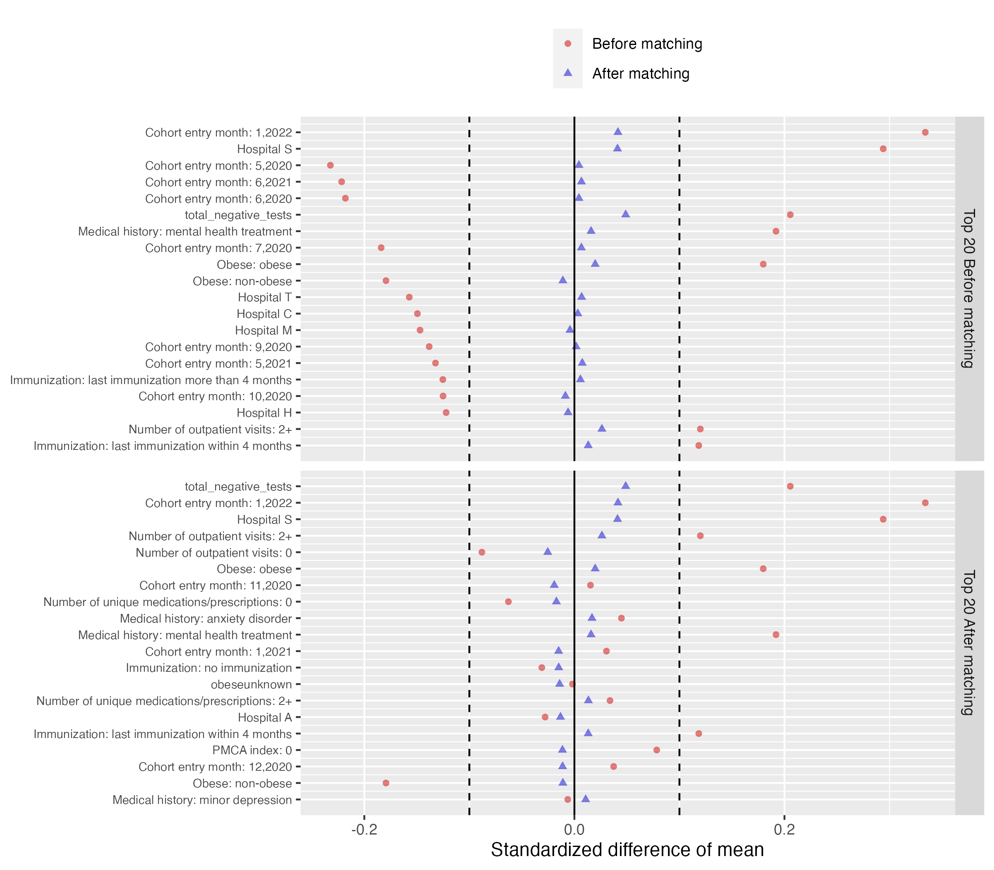


## C. Risk difference of COVID-19 positive group compared to COVID-19 negative group

**Supp Table 13.** Estimated risk difference in mental health conditions between the COVID-19 positive cohort and COVID-19 negative cohort for children in Asian/PI group

| **Category** | **Cluster** | **Risk difference (%)** | **95% CI (%)** | **P value** |
| --- | --- | --- | --- | --- |
| Composite | At least one incident | 0.54 | (-0.680, 1.759) | 0.386 |
| Adverse childhood experiences | Emotional abuse | -0.029 | (-0.083, 0.025) | 0.292 |
|  | Neglect | 0.025 | (-0.023, 0.074) | 0.303 |
|  | Physical abuse | 0.034 | (-0.039, 0.107) | 0.360 |
|  | Sexual abuse | 0.002 | (-0.052, 0.057) | 0.931 |
| Anxiety disorders | Anxiety disorder | 0.172 | (-0.287, 0.631) | 0.462 |
|  | OCD | 0.118 | (-0.008, 0.244) | 0.067 |
|  | Somatoform disorder | 0.08 | (-0.115, 0.276) | 0.422 |
|  | Stress disorder | 0.102 | (-0.253, 0.456) | 0.573 |
| Disruptive behavior disorders | Conduct disorder | -0.029 | (-0.209, 0.151) | 0.751 |
|  | Impulse control disorder | 0 | (-0.145, 0.145) | 1.000 |
|  | Oppositional defiant disorder | 0.045 | (-0.064, 0.153) | 0.417 |
| Eating and feeding disorders | Avoidant restrictive food intake | 0.032 | (-0.220, 0.283) | 0.806 |
|  | Other eating and feeding disorder | -0.098 | (-0.220, 0.023) | 0.112 |
| Elimination disorders | Encopresis | 0.041 | (-0.070, 0.152) | 0.467 |
|  | Enuresis | 0.017 | (-0.218, 0.252) | 0.888 |
| Gender dysphoria sexual dysfunction | Gender dysphoria | -0.029 | (-0.093, 0.035) | 0.373 |
|  | Paraphilia | NA | NA | NA |
|  | Sexual dysfunction | -0.01 | (-0.034, 0.015) | 0.433 |
| Intentional self-harm/suicidality | Parasuicidality | -0.096 | (-0.204, 0.013) | 0.083 |
|  | Suicidality | 0.034 | (-0.046, 0.114) | 0.408 |
| Mood disorders | Bipolar disorder | -0.01 | (-0.082, 0.063) | 0.794 |
|  | Major depression | -0.1 | (-0.200, 0.000) | 0.051 |
|  | Minor depression | 0.021 | (-0.123, 0.164) | 0.779 |
| Neurocognitive disorders | Catatonia | NA | NA | NA |
|  | Delirium | 0.01 | (-0.107, 0.126) | 0.870 |
|  | Encephalopathy | 0.041 | (-0.053, 0.135) | 0.389 |
| Neurodevelopmental disorders | Academic developmental disorder | 0.073 | (-0.182, 0.328) | 0.576 |
|  | ADHD | 0.24 | (-0.301, 0.782) | 0.385 |
|  | Autism spectrum disorder | 0.112 | (-0.586, 0.809) | 0.754 |
|  | Communication motor disorder | -0.353 | (-1.023, 0.317) | 0.302 |
|  | Intellectual disability | 0.058 | (-0.396, 0.513) | 0.802 |
| Personality disorders | Personality disorder | 0.028 | (-0.026, 0.082) | 0.314 |
| Psychotic disorders | Psychotic disorder | 0.035 | (-0.038, 0.108) | 0.343 |
|  | Schizoaffective disorder | NA | NA | NA |
|  | Schizophrenia | NA | NA | NA |
| Sleep wake disorders | Hypersomnia | -0.028 | (-0.108, 0.053) | 0.497 |
|  | Insomnia | 0.046 | (-0.140, 0.232) | 0.628 |
|  | Parasomnias | 0.006 | (-0.182, 0.194) | 0.950 |
| Standalone symptoms | Anger aggression | -0.102 | (-0.259, 0.055) | 0.204 |
|  | Anxiety symptoms | 0.059 | (-0.164, 0.283) | 0.602 |
|  | Attention symptoms | 0.138 | (-0.104, 0.381) | 0.263 |
|  | Depressive symptoms | 0 | (-0.034, 0.034) | 1.000 |
|  | Hallucinations | -0.01 | (-0.034, 0.015) | 0.433 |
| Substance use and dependence | Alcohol | NA | NA | NA |
|  | Opioid related | NA | NA | NA |
|  | Other substances | 0 | (-0.034, 0.034) | 1.000 |
|  | THC | NA | NA | NA |
|  | Tobacco | NA | NA | NA |
| Tic disorders | Tic disorder | 0.063 | (-0.154, 0.280) | 0.568 |

**Supp Table 14,** Estimated risk difference in mental health conditions between the COVID-19 positive cohort and COVID-19 negative cohort for children in Black/AA group

| **Category** | **Cluster** | **Risk difference (%)** | **95% CI (%)** | **P value** |
| --- | --- | --- | --- | --- |
| Composite | At least one incident | 0.586 | (-0.155, 1.327) | 0.121 |
| Adverse childhood experiences | Emotional abuse | -0.03 | (-0.076, 0.015) | 0.194 |
|  | Neglect | 0.01 | (-0.023, 0.044) | 0.552 |
|  | Physical abuse | -0.021 | (-0.113, 0.072) | 0.662 |
|  | Sexual abuse | -0.013 | (-0.091, 0.065) | 0.747 |
| Anxiety disorders | Anxiety disorder | 0.376 | (0.110, 0.642) | 0.006 |
|  | OCD | 0.003 | (-0.050, 0.057) | 0.899 |
|  | Somatoform disorder | -0.046 | (-0.158, 0.066) | 0.423 |
|  | Stress disorder | 0.124 | (-0.162, 0.410) | 0.397 |
| Disruptive behavior disorders | Conduct disorder | -0.164 | (-0.334, 0.006) | 0.059 |
|  | Impulse control disorder | -0.063 | (-0.212, 0.085) | 0.404 |
|  | Oppositional defiant disorder | -0.046 | (-0.177, 0.086) | 0.496 |
| Eating and feeding disorders | Avoidant restrictive food intake | 0.036 | (-0.079, 0.152) | 0.538 |
|  | Other eating and feeding disorder | 0.007 | (-0.064, 0.077) | 0.852 |
| Elimination disorders | Encopresis | 0.008 | (-0.071, 0.088) | 0.841 |
|  | Enuresis | 0.129 | (-0.067, 0.325) | 0.198 |
| Gender dysphoria sexual dysfunction | Gender dysphoria | -0.008 | (-0.038, 0.023) | 0.619 |
|  | Paraphilia | NA | NA | NA |
|  | Sexual dysfunction | 0.004 | (-0.002, 0.011) | 0.192 |
| Intentional self-harm/suicidality | Parasuicidality | 0.016 | (-0.044, 0.075) | 0.603 |
|  | Suicidality | 0.069 | (-0.039, 0.177) | 0.211 |
| Mood disorders | Bipolar disorder | 0.047 | (-0.006, 0.100) | 0.081 |
|  | Major depression | -0.022 | (-0.125, 0.081) | 0.670 |
|  | Minor depression | -0.034 | (-0.169, 0.100) | 0.615 |
| Neurocognitive disorders | Catatonia | 0.008 | (-0.004, 0.021) | 0.192 |
|  | Delirium | 0.074 | (-0.004, 0.152) | 0.062 |
|  | Encephalopathy | -0.004 | (-0.040, 0.032) | 0.832 |
| Neurodevelopmental disorders | Academic developmental disorder | 0.007 | (-0.197, 0.210) | 0.949 |
|  | ADHD | 0.251 | (-0.214, 0.715) | 0.291 |
|  | Autism spectrum disorder | -0.076 | (-0.397, 0.244) | 0.640 |
|  | Communication motor disorder | 0.022 | (-0.332, 0.375) | 0.904 |
|  | Intellectual disability | 0.044 | (-0.193, 0.282) | 0.713 |
| Personality disorders | Personality disorder | -0.017 | (-0.046, 0.013) | 0.274 |
| Psychotic disorders | Psychotic disorder | 0.002 | (-0.051, 0.054) | 0.953 |
|  | Schizoaffective disorder | NA | NA | NA |
|  | Schizophrenia | -0.017 | (-0.039, 0.005) | 0.132 |
| Sleep wake disorders | Hypersomnia | -0.002 | (-0.062, 0.057) | 0.943 |
|  | Insomnia | -0.003 | (-0.161, 0.155) | 0.972 |
|  | Parasomnias | 0.002 | (-0.079, 0.082) | 0.966 |
| Standalone symptoms | Anger aggression | 0.036 | (-0.086, 0.158) | 0.559 |
|  | Anxiety symptoms | 0.033 | (-0.073, 0.139) | 0.541 |
|  | Attention symptoms | -0.061 | (-0.216, 0.094) | 0.442 |
|  | Depressive symptoms | -0.018 | (-0.049, 0.014) | 0.276 |
|  | Hallucinations | 0.002 | (-0.054, 0.058) | 0.943 |
| Substance use and dependence | Alcohol | -0.002 | (-0.009, 0.004) | 0.444 |
|  | Opioid related | 0.016 | (-0.009, 0.040) | 0.205 |
|  | Other substances | 0.009 | (-0.015, 0.034) | 0.464 |
|  | THC | -0.002 | (-0.009, 0.004) | 0.444 |
|  | Tobacco | 0.001 | (-0.010, 0.012) | 0.896 |
| Tic disorders | Tic disorder | 0.085 | (-0.009, 0.180) | 0.075 |

**Supp Table 15.** Estimated risk difference in mental health conditions between the COVID-19 positive cohort and COVID-19 negative cohort for children in Hispanic group

| **Category** | **Cluster** | **Risk difference (%)** | **95% CI (%)** | **P value** |
| --- | --- | --- | --- | --- |
| Composite | At least one incident | 1.133 | (0.499, 1.766) | <0.001 |
| Adverse childhood experiences | Emotional abuse | 0.01 | (-0.042, 0.062) | 0.697 |
|  | Neglect | 0.008 | (-0.012, 0.027) | 0.438 |
|  | Physical abuse | -0.041 | (-0.103, 0.022) | 0.200 |
|  | Sexual abuse | 0.01 | (-0.033, 0.053) | 0.659 |
| Anxiety disorders | Anxiety disorder | 0.346 | (0.078, 0.615) | 0.011 |
|  | OCD | 0.02 | (-0.029, 0.070) | 0.426 |
|  | Somatoform disorder | 0.047 | (-0.058, 0.151) | 0.382 |
|  | Stress disorder | 0.119 | (-0.130, 0.368) | 0.348 |
| Disruptive behavior disorders | Conduct disorder | 0.051 | (-0.071, 0.174) | 0.413 |
|  | Impulse control disorder | -0.007 | (-0.096, 0.083) | 0.886 |
|  | Oppositional defiant disorder | 0.051 | (-0.037, 0.139) | 0.255 |
| Eating and feeding disorders | Avoidant restrictive food intake | 0.08 | (-0.041, 0.202) | 0.194 |
|  | Other eating and feeding disorder | 0.017 | (-0.035, 0.069) | 0.526 |
| Elimination disorders | Encopresis | -0.023 | (-0.094, 0.049) | 0.534 |
|  | Enuresis | -0.053 | (-0.179, 0.074) | 0.416 |
| Gender dysphoria sexual dysfunction | Gender dysphoria | 0 | (-0.033, 0.033) | 1.000 |
|  | Paraphilia | NA | NA | NA |
|  | Sexual dysfunction | -0.003 | (-0.012, 0.005) | 0.456 |
| Intentional self-harm/suicidality | Parasuicidality | -0.008 | (-0.053, 0.038) | 0.738 |
|  | Suicidality | 0.028 | (-0.035, 0.090) | 0.382 |
| Mood disorders | Bipolar disorder | 0.04 | (-0.004, 0.083) | 0.073 |
|  | Major depression | -0.054 | (-0.147, 0.040) | 0.258 |
|  | Minor depression | 0.019 | (-0.094, 0.131) | 0.746 |
| Neurocognitive disorders | Catatonia | -0.007 | (-0.020, 0.006) | 0.283 |
|  | Delirium | 0.063 | (0.009, 0.117) | 0.022 |
|  | Encephalopathy | -0.025 | (-0.064, 0.013) | 0.197 |
| Neurodevelopmental disorders | Academic developmental disorder | -0.058 | (-0.235, 0.119) | 0.521 |
|  | ADHD | 0.19 | (-0.141, 0.520) | 0.261 |
|  | Autism spectrum disorder | 0.289 | (0.001, 0.577) | 0.049 |
|  | Communication motor disorder | 0.301 | (-0.013, 0.615) | 0.060 |
|  | Intellectual disability | -0.014 | (-0.230, 0.203) | 0.902 |
| Personality disorders | Personality disorder | 0.015 | (-0.011, 0.040) | 0.253 |
| Psychotic disorders | Psychotic disorder | -0.008 | (-0.036, 0.020) | 0.584 |
|  | Schizoaffective disorder | NA | NA | NA |
|  | Schizophrenia | -0.001 | (-0.012, 0.010) | 0.908 |
| Sleep wake disorders | Hypersomnia | 0.006 | (-0.034, 0.046) | 0.773 |
|  | Insomnia | -0.024 | (-0.139, 0.091) | 0.683 |
|  | Parasomnias | 0.034 | (-0.051, 0.120) | 0.430 |
| Standalone symptoms | Anger aggression | 0.012 | (-0.076, 0.101) | 0.786 |
|  | Anxiety symptoms | 0.1 | (-0.019, 0.219) | 0.098 |
|  | Attention symptoms | 0.097 | (-0.032, 0.226) | 0.140 |
|  | Depressive symptoms | 0.005 | (-0.024, 0.035) | 0.731 |
|  | Hallucinations | 0.002 | (-0.036, 0.040) | 0.920 |
| Substance use and dependence | Alcohol | NA | NA | NA |
|  | Opioid related | -0.006 | (-0.016, 0.003) | 0.197 |
|  | Other substances | 0.006 | (-0.017, 0.028) | 0.612 |
|  | THC | -0.002 | (-0.007, 0.003) | 0.438 |
|  | Tobacco | 0.009 | (-0.003, 0.021) | 0.140 |
| Tic disorders | Tic disorder | -0.014 | (-0.110, 0.082) | 0.770 |

**Supp Table 16.** Estimated risk difference in mental health conditions between the COVID-19 positive cohort and COVID-19 negative cohort for children in White group

| **Category** | **Cluster** | **Risk difference (%)** | **95% CI (%)** | **P value** |
| --- | --- | --- | --- | --- |
| Composite | At least one incident | 0.718 | (0.187, 1.249) | 0.008 |
| Adverse childhood experiences | Emotional abuse | 0.001 | (-0.022, 0.024) | 0.939 |
|  | Neglect | 0.014 | (-0.006, 0.033) | 0.171 |
|  | Physical abuse | 0.046 | (0.000, 0.092) | 0.048 |
|  | Sexual abuse | 0.022 | (-0.013, 0.057) | 0.211 |
| Anxiety disorders | Anxiety disorder | 0.253 | (-0.017, 0.524) | 0.066 |
|  | OCD | 0.047 | (-0.027, 0.120) | 0.215 |
|  | Somatoform disorder | 0.08 | (0.008, 0.152) | 0.029 |
|  | Stress disorder | 0.106 | (-0.085, 0.296) | 0.278 |
| Disruptive behavior disorders | Conduct disorder | -0.018 | (-0.128, 0.091) | 0.743 |
|  | Impulse control disorder | -0.078 | (-0.195, 0.038) | 0.187 |
|  | Oppositional defiant disorder | 0.054 | (-0.046, 0.154) | 0.289 |
| Eating and feeding disorders | Avoidant restrictive food intake | 0.006 | (-0.084, 0.096) | 0.897 |
|  | Other eating and feeding disorder | -0.03 | (-0.077, 0.018) | 0.218 |
| Elimination disorders | Encopresis | 0.048 | (-0.026, 0.122) | 0.202 |
|  | Enuresis | 0.013 | (-0.120, 0.147) | 0.845 |
| Gender dysphoria sexual dysfunction | Gender dysphoria | 0.002 | (-0.037, 0.042) | 0.903 |
|  | Paraphilia | 0 | (-0.004, 0.004) | 1.000 |
|  | Sexual dysfunction | -0.003 | (-0.009, 0.003) | 0.300 |
| Intentional self-harm/suicidality | Parasuicidality | 0.013 | (-0.038, 0.063) | 0.628 |
|  | Suicidality | 0.026 | (-0.037, 0.090) | 0.414 |
| Mood disorders | Bipolar disorder | -0.002 | (-0.042, 0.037) | 0.916 |
|  | Major depression | 0.008 | (-0.074, 0.090) | 0.850 |
|  | Minor depression | -0.012 | (-0.116, 0.092) | 0.819 |
| Neurocognitive disorders | Catatonia | 0.006 | (-0.003, 0.016) | 0.180 |
|  | Delirium | 0.032 | (-0.015, 0.079) | 0.178 |
|  | Encephalopathy | 0.024 | (-0.012, 0.060) | 0.183 |
| Neurodevelopmental disorders | Academic developmental disorder | 0.04 | (-0.086, 0.165) | 0.537 |
|  | ADHD | 0.064 | (-0.291, 0.419) | 0.723 |
|  | Autism spectrum disorder | 0.125 | (-0.098, 0.348) | 0.273 |
|  | Communication motor disorder | 0.266 | (0.029, 0.502) | 0.028 |
|  | Intellectual disability | 0.209 | (0.039, 0.379) | 0.016 |
| Personality disorders | Personality disorder | 0.01 | (-0.017, 0.036) | 0.479 |
| Psychotic disorders | Psychotic disorder | 0.009 | (-0.018, 0.036) | 0.507 |
|  | Schizoaffective disorder | 0.001 | (-0.004, 0.006) | 0.658 |
|  | Schizophrenia | 0.004 | (-0.002, 0.011) | 0.204 |
| Sleep wake disorders | Hypersomnia | -0.003 | (-0.043, 0.038) | 0.901 |
|  | Insomnia | 0.022 | (-0.093, 0.136) | 0.710 |
|  | Parasomnias | 0.043 | (-0.043, 0.129) | 0.325 |
| Standalone symptoms | Anger aggression | 0.02 | (-0.074, 0.113) | 0.683 |
|  | Anxiety symptoms | 0.021 | (-0.050, 0.092) | 0.565 |
|  | Attention symptoms | 0.027 | (-0.084, 0.139) | 0.629 |
|  | Depressive symptoms | 0.015 | (-0.007, 0.038) | 0.186 |
|  | Hallucinations | 0.014 | (-0.016, 0.045) | 0.359 |
| Substance use and dependence | Alcohol | -0.003 | (-0.012, 0.007) | 0.595 |
|  | Opioid related | 0 | (-0.014, 0.013) | 0.946 |
|  | Other substances | 0.002 | (-0.019, 0.023) | 0.858 |
|  | THC | 0.001 | (-0.002, 0.004) | 0.443 |
|  | Tobacco | -0.004 | (-0.012, 0.003) | 0.283 |
| Tic disorders | Tic disorder | 0.068 | (-0.036, 0.172) | 0.202 |

**Supp Table 17.** Estimated risk difference in mental health conditions between the COVID-19 positive cohort and COVID-19 negative cohort for youths in Asian/PI group

| **Category** | **Cluster** | **Risk difference (%)** | **95% CI (%)** | **P value** |
| --- | --- | --- | --- | --- |
| Composite | At least one incident | 0.465 | (-0.957, 1.886) | 0.522 |
| Adverse childhood experiences | Emotional abuse | 0 | (-0.069, 0.069) | 1.000 |
|  | Neglect | -0.016 | (-0.040, 0.009) | 0.209 |
|  | Physical abuse | 0.06 | (-0.060, 0.179) | 0.330 |
|  | Sexual abuse | 0.002 | (-0.093, 0.096) | 0.974 |
| Anxiety disorders | Anxiety disorder | -0.216 | (-1.109, 0.677) | 0.636 |
|  | OCD | 0.06 | (-0.201, 0.321) | 0.651 |
|  | Somatoform disorder | -0.107 | (-0.377, 0.164) | 0.440 |
|  | Stress disorder | 0.225 | (-0.359, 0.809) | 0.449 |
| Disruptive behavior disorders | Conduct disorder | -0.071 | (-0.226, 0.084) | 0.367 |
|  | Impulse control disorder | -0.055 | (-0.252, 0.142) | 0.582 |
|  | Oppositional defiant disorder | 0.002 | (-0.125, 0.129) | 0.981 |
| Eating and feeding disorders | Avoidant restrictive food intake | 0.04 | (-0.401, 0.482) | 0.858 |
|  | Other eating and feeding disorder | 0.026 | (-0.052, 0.103) | 0.516 |
| Elimination disorders | Encopresis | 0.012 | (-0.037, 0.060) | 0.645 |
|  | Enuresis | 0.018 | (-0.113, 0.150) | 0.785 |
| Gender dysphoria sexual dysfunction | Gender dysphoria | 0.003 | (-0.258, 0.264) | 0.981 |
|  | Paraphilia | 0.047 | (-0.008, 0.102) | 0.092 |
|  | Sexual dysfunction | 0 | (-0.049, 0.049) | 1.000 |
| Intentional self-harm/suicidality | Parasuicidality | 0.05 | (-0.117, 0.218) | 0.557 |
|  | Suicidality | 0.195 | (-0.152, 0.542) | 0.271 |
| Mood disorders | Bipolar disorder | -0.02 | (-0.182, 0.142) | 0.810 |
|  | Major depression | -0.142 | (-0.845, 0.561) | 0.692 |
|  | Minor depression | 0.222 | (-0.453, 0.898) | 0.519 |
| Neurocognitive disorders | Catatonia | 0.031 | (-0.046, 0.109) | 0.427 |
|  | Delirium | 0.121 | (-0.082, 0.324) | 0.242 |
|  | Encephalopathy | 0.063 | (-0.071, 0.197) | 0.359 |
| Neurodevelopmental disorders | Academic developmental disorder | 0.077 | (-0.154, 0.309) | 0.513 |
|  | ADHD | -0.087 | (-0.645, 0.470) | 0.759 |
|  | Autism spectrum disorder | 0.159 | (-0.316, 0.634) | 0.512 |
|  | Communication motor disorder | -0.054 | (-0.417, 0.309) | 0.771 |
|  | Intellectual disability | 0.26 | (-0.123, 0.643) | 0.183 |
| Personality disorders | Personality disorder | -0.083 | (-0.225, 0.060) | 0.256 |
| Psychotic disorders | Psychotic disorder | 0.053 | (-0.118, 0.224) | 0.545 |
|  | Schizoaffective disorder | 0 | (-0.049, 0.049) | 1.000 |
|  | Schizophrenia | -0.02 | (-0.097, 0.057) | 0.615 |
| Sleep wake disorders | Hypersomnia | -0.095 | (-0.236, 0.045) | 0.184 |
|  | Insomnia | 0.081 | (-0.254, 0.415) | 0.637 |
|  | Parasomnias | -0.028 | (-0.171, 0.114) | 0.698 |
| Standalone symptoms | Anger aggression | 0.013 | (-0.165, 0.190) | 0.890 |
|  | Anxiety symptoms | 0.283 | (0.038, 0.529) | 0.024 |
|  | Attention symptoms | 0.055 | (-0.203, 0.313) | 0.677 |
|  | Depressive symptoms | 0.093 | (-0.008, 0.193) | 0.072 |
|  | Hallucinations | -0.024 | (-0.146, 0.098) | 0.700 |
| Substance use and dependence | Alcohol | -0.071 | (-0.180, 0.038) | 0.203 |
|  | Opioid related | -0.004 | (-0.059, 0.051) | 0.881 |
|  | Other substances | 0.027 | (-0.113, 0.168) | 0.704 |
|  | THC | -0.095 | (-0.227, 0.037) | 0.157 |
|  | Tobacco | 0.003 | (-0.193, 0.198) | 0.979 |
| Tic disorders | Tic disorder | 0.097 | (-0.132, 0.326) | 0.408 |

**Supp Table 18.** Estimated risk difference in mental health conditions between the COVID-19 positive cohort and COVID-19 negative cohort for youths in Black/AA group

| **Category** | **Cluster** | **Risk difference (%)** | **95% CI (%)** | **P value** |
| --- | --- | --- | --- | --- |
| Composite | At least one incident | 0.124 | (-0.608, 0.856) | 0.740 |
| Adverse childhood experiences | Emotional abuse | 0.03 | (-0.003, 0.064) | 0.072 |
|  | Neglect | -0.008 | (-0.038, 0.022) | 0.619 |
|  | Physical abuse | 0.114 | (0.019, 0.210) | 0.019 |
|  | Sexual abuse | 0.048 | (-0.034, 0.129) | 0.255 |
| Anxiety disorders | Anxiety disorder | -0.223 | (-0.638, 0.191) | 0.291 |
|  | OCD | 0.015 | (-0.067, 0.096) | 0.727 |
|  | Somatoform disorder | -0.098 | (-0.244, 0.049) | 0.190 |
|  | Stress disorder | -0.306 | (-0.645, 0.033) | 0.077 |
| Disruptive behavior disorders | Conduct disorder | 0.023 | (-0.094, 0.139) | 0.701 |
|  | Impulse control disorder | 0.034 | (-0.125, 0.193) | 0.677 |
|  | Oppositional defiant disorder | 0.104 | (-0.039, 0.247) | 0.155 |
| Eating and feeding disorders | Avoidant restrictive food intake | -0.02 | (-0.171, 0.130) | 0.790 |
|  | Other eating and feeding disorder | -0.008 | (-0.059, 0.042) | 0.746 |
| Elimination disorders | Encopresis | 0.01 | (-0.019, 0.038) | 0.509 |
|  | Enuresis | 0.099 | (-0.011, 0.209) | 0.079 |
| Gender dysphoria sexual dysfunction | Gender dysphoria | -0.05 | (-0.123, 0.023) | 0.181 |
|  | Paraphilia | NA | NA | NA |
|  | Sexual dysfunction | 0.003 | (-0.026, 0.033) | 0.815 |
| Intentional self-harm/suicidality | Parasuicidality | 0.006 | (-0.092, 0.104) | 0.906 |
|  | Suicidality | 0.184 | (-0.040, 0.407) | 0.108 |
| Mood disorders | Bipolar disorder | -0.073 | (-0.159, 0.012) | 0.093 |
|  | Major depression | -0.259 | (-0.617, 0.099) | 0.157 |
|  | Minor depression | 0.138 | (-0.228, 0.503) | 0.461 |
| Neurocognitive disorders | Catatonia | 0.024 | (-0.012, 0.060) | 0.189 |
|  | Delirium | 0.176 | (0.028, 0.325) | 0.020 |
|  | Encephalopathy | -0.013 | (-0.062, 0.036) | 0.596 |
| Neurodevelopmental disorders | Academic developmental disorder | 0.007 | (-0.140, 0.154) | 0.926 |
|  | ADHD | 0.264 | (-0.146, 0.673) | 0.207 |
|  | Autism spectrum disorder | 0.098 | (-0.110, 0.307) | 0.355 |
|  | Communication motor disorder | 0.064 | (-0.092, 0.220) | 0.420 |
|  | Intellectual disability | -0.066 | (-0.260, 0.128) | 0.506 |
| Personality disorders | Personality disorder | -0.008 | (-0.066, 0.051) | 0.796 |
| Psychotic disorders | Psychotic disorder | -0.015 | (-0.126, 0.096) | 0.792 |
|  | Schizoaffective disorder | -0.01 | (-0.047, 0.026) | 0.576 |
|  | Schizophrenia | 0.008 | (-0.063, 0.079) | 0.824 |
| Sleep wake disorders | Hypersomnia | 0.005 | (-0.071, 0.082) | 0.889 |
|  | Insomnia | 0.074 | (-0.098, 0.245) | 0.400 |
|  | Parasomnias | 0.046 | (-0.016, 0.108) | 0.150 |
| Standalone symptoms | Anger aggression | 0.072 | (-0.064, 0.209) | 0.298 |
|  | Anxiety symptoms | 0.113 | (-0.002, 0.227) | 0.054 |
|  | Attention symptoms | 0.003 | (-0.105, 0.111) | 0.960 |
|  | Depressive symptoms | 0.02 | (-0.026, 0.066) | 0.393 |
|  | Hallucinations | 0.035 | (-0.043, 0.113) | 0.386 |
| Substance use and dependence | Alcohol | -0.019 | (-0.065, 0.028) | 0.431 |
|  | Opioid related | -0.004 | (-0.050, 0.041) | 0.857 |
|  | Other substances | -0.047 | (-0.114, 0.020) | 0.166 |
|  | THC | -0.112 | (-0.222, -0.001) | 0.047 |
|  | Tobacco | -0.062 | (-0.197, 0.072) | 0.361 |
| Tic disorders | Tic disorder | 0.001 | (-0.075, 0.078) | 0.972 |

**Supp Table 19.** Estimated risk difference in mental health conditions between the COVID-19 positive cohort and COVID-19 negative cohort for youths in Hispanic group

| **Category** | **Cluster** | **Risk difference (%)** | **95% CI (%)** | **P value** |
| --- | --- | --- | --- | --- |
| Composite | At least one incident | 1.101 | (0.457, 1.745) | <0.001 |
| Adverse childhood experiences | Emotional abuse | 0.003 | (-0.036, 0.043) | 0.875 |
|  | Neglect | -0.003 | (-0.021, 0.015) | 0.774 |
|  | Physical abuse | 0.005 | (-0.053, 0.064) | 0.855 |
|  | Sexual abuse | 0.061 | (0.003, 0.120) | 0.040 |
| Anxiety disorders | Anxiety disorder | 0.398 | (-0.026, 0.822) | 0.066 |
|  | OCD | 0.008 | (-0.070, 0.087) | 0.832 |
|  | Somatoform disorder | 0.012 | (-0.115, 0.139) | 0.857 |
|  | Stress disorder | 0.21 | (-0.093, 0.512) | 0.174 |
| Disruptive behavior disorders | Conduct disorder | -0.064 | (-0.144, 0.016) | 0.119 |
|  | Impulse control disorder | -0.027 | (-0.104, 0.050) | 0.494 |
|  | Oppositional defiant disorder | 0.028 | (-0.049, 0.105) | 0.479 |
| Eating and feeding disorders | Avoidant restrictive food intake | -0.049 | (-0.224, 0.126) | 0.586 |
|  | Other eating and feeding disorder | -0.035 | (-0.069, -0.002) | 0.038 |
| Elimination disorders | Encopresis | 0.001 | (-0.026, 0.029) | 0.917 |
|  | Enuresis | -0.009 | (-0.069, 0.050) | 0.761 |
| Gender dysphoria sexual dysfunction | Gender dysphoria | -0.033 | (-0.127, 0.061) | 0.486 |
|  | Paraphilia | -0.007 | (-0.016, 0.002) | 0.140 |
|  | Sexual dysfunction | 0.002 | (-0.022, 0.025) | 0.898 |
| Intentional self-harm/suicidality | Parasuicidality | 0.017 | (-0.066, 0.101) | 0.684 |
|  | Suicidality | 0.081 | (-0.072, 0.235) | 0.298 |
| Mood disorders | Bipolar disorder | -0.032 | (-0.098, 0.033) | 0.337 |
|  | Major depression | 0.314 | (-0.006, 0.634) | 0.055 |
|  | Minor depression | 0.223 | (-0.103, 0.550) | 0.180 |
| Neurocognitive disorders | Catatonia | -0.013 | (-0.036, 0.011) | 0.292 |
|  | Delirium | 0.065 | (-0.047, 0.178) | 0.255 |
|  | Encephalopathy | -0.001 | (-0.046, 0.044) | 0.962 |
| Neurodevelopmental disorders | Academic developmental disorder | 0.123 | (-0.003, 0.249) | 0.055 |
|  | ADHD | 0.204 | (-0.079, 0.487) | 0.158 |
|  | Autism spectrum disorder | 0.017 | (-0.170, 0.203) | 0.862 |
|  | Communication motor disorder | -0.015 | (-0.148, 0.118) | 0.828 |
|  | Intellectual disability | 0.117 | (-0.052, 0.286) | 0.176 |
| Personality disorders | Personality disorder | 0.016 | (-0.037, 0.069) | 0.548 |
| Psychotic disorders | Psychotic disorder | -0.033 | (-0.098, 0.032) | 0.323 |
|  | Schizoaffective disorder | -0.01 | (-0.038, 0.018) | 0.479 |
|  | Schizophrenia | -0.041 | (-0.085, 0.004) | 0.073 |
| Sleep wake disorders | Hypersomnia | -0.008 | (-0.062, 0.045) | 0.763 |
|  | Insomnia | 0.024 | (-0.129, 0.178) | 0.755 |
|  | Parasomnias | 0.024 | (-0.037, 0.084) | 0.445 |
| Standalone symptoms | Anger aggression | 0.065 | (-0.021, 0.151) | 0.140 |
|  | Anxiety symptoms | 0.094 | (-0.022, 0.210) | 0.112 |
|  | Attention symptoms | 0.1 | (0.001, 0.199) | 0.047 |
|  | Depressive symptoms | -0.008 | (-0.050, 0.033) | 0.695 |
|  | Hallucinations | -0.031 | (-0.085, 0.023) | 0.258 |
| Substance use and dependence | Alcohol | 0.024 | (-0.027, 0.076) | 0.356 |
|  | Opioid related | -0.001 | (-0.031, 0.030) | 0.972 |
|  | Other substances | 0.006 | (-0.065, 0.076) | 0.877 |
|  | THC | 0.031 | (-0.054, 0.115) | 0.475 |
|  | Tobacco | 0.022 | (-0.061, 0.105) | 0.604 |
| Tic disorders | Tic disorder | 0.025 | (-0.045, 0.096) | 0.483 |

**Supp Table 20.** Estimated risk difference in mental health conditions between the COVID-19 positive cohort and COVID-19 negative cohort for youths in White group

| **Category** | **Cluster** | **Risk difference (%)** | **95% CI (%)** | **P value** |
| --- | --- | --- | --- | --- |
| Composite | At least one incident | 1.123 | (0.647, 1.599) | <0.001 |
| Adverse childhood experiences | Emotional abuse | 0.007 | (-0.010, 0.025) | 0.423 |
|  | Neglect | 0.009 | (-0.007, 0.025) | 0.276 |
|  | Physical abuse | 0.017 | (-0.027, 0.061) | 0.453 |
|  | Sexual abuse | 0.012 | (-0.025, 0.049) | 0.534 |
| Anxiety disorders | Anxiety disorder | 0.461 | (0.111, 0.810) | 0.010 |
|  | OCD | 0.034 | (-0.063, 0.131) | 0.493 |
|  | Somatoform disorder | -0.012 | (-0.099, 0.075) | 0.787 |
|  | Stress disorder | 0.145 | (-0.052, 0.341) | 0.149 |
| Disruptive behavior disorders | Conduct disorder | -0.048 | (-0.105, 0.009) | 0.101 |
|  | Impulse control disorder | 0.003 | (-0.084, 0.090) | 0.947 |
|  | Oppositional defiant disorder | -0.022 | (-0.101, 0.057) | 0.585 |
| Eating and feeding disorders | Avoidant restrictive food intake | -0.133 | (-0.266, 0.001) | 0.051 |
|  | Other eating and feeding disorder | 0.013 | (-0.019, 0.044) | 0.437 |
| Elimination disorders | Encopresis | 0.018 | (-0.007, 0.043) | 0.162 |
|  | Enuresis | -0.004 | (-0.058, 0.049) | 0.872 |
| Gender dysphoria sexual dysfunction | Gender dysphoria | -0.006 | (-0.093, 0.081) | 0.892 |
|  | Paraphilia | -0.007 | (-0.018, 0.004) | 0.204 |
|  | Sexual dysfunction | 0.002 | (-0.016, 0.021) | 0.805 |
| Intentional self-harm/suicidality | Parasuicidality | 0.05 | (-0.025, 0.124) | 0.190 |
|  | Suicidality | 0.115 | (-0.014, 0.245) | 0.081 |
| Mood disorders | Bipolar disorder | 0.013 | (-0.036, 0.063) | 0.597 |
|  | Major depression | -0.274 | (-0.524, -0.024) | 0.032 |
|  | Minor depression | 0.312 | (0.065, 0.558) | 0.013 |
| Neurocognitive disorders | Catatonia | 0 | (-0.017, 0.018) | 0.957 |
|  | Delirium | 0.061 | (-0.017, 0.138) | 0.126 |
|  | Encephalopathy | 0.015 | (-0.016, 0.047) | 0.342 |
| Neurodevelopmental disorders | Academic developmental disorder | 0.028 | (-0.048, 0.104) | 0.467 |
|  | ADHD | 0.468 | (0.183, 0.753) | 0.001 |
|  | Autism spectrum disorder | 0.068 | (-0.080, 0.215) | 0.369 |
|  | Communication motor disorder | 0.092 | (-0.000, 0.184) | 0.051 |
|  | Intellectual disability | 0.114 | (-0.001, 0.229) | 0.051 |
| Personality disorders | Personality disorder | -0.034 | (-0.090, 0.023) | 0.243 |
| Psychotic disorders | Psychotic disorder | -0.016 | (-0.060, 0.028) | 0.483 |
|  | Schizoaffective disorder | -0.001 | (-0.021, 0.019) | 0.918 |
|  | Schizophrenia | -0.006 | (-0.031, 0.020) | 0.667 |
| Sleep wake disorders | Hypersomnia | 0.023 | (-0.031, 0.076) | 0.404 |
|  | Insomnia | 0.131 | (0.011, 0.250) | 0.032 |
|  | Parasomnias | 0.028 | (-0.023, 0.079) | 0.280 |
| Standalone symptoms | Anger aggression | 0.004 | (-0.064, 0.072) | 0.908 |
|  | Anxiety symptoms | 0.019 | (-0.040, 0.078) | 0.526 |
|  | Attention symptoms | 0.092 | (0.010, 0.174) | 0.027 |
|  | Depressive symptoms | 0.029 | (0.006, 0.052) | 0.014 |
|  | Hallucinations | 0.023 | (-0.017, 0.064) | 0.253 |
| Substance use and dependence | Alcohol | -0.002 | (-0.044, 0.039) | 0.906 |
|  | Opioid related | 0.01 | (-0.015, 0.034) | 0.453 |
|  | Other substances | -0.008 | (-0.061, 0.045) | 0.767 |
|  | THC | 0.004 | (-0.056, 0.063) | 0.905 |
|  | Tobacco | 0.044 | (-0.047, 0.135) | 0.343 |
| Tic disorders | Tic disorder | 0.043 | (-0.037, 0.123) | 0.288 |

# Section 10 Supplemental Results: sensitivity analysis for obese/non-obese subgroups

We conducted sensitivity analyses on both cohorts stratified by the obesity status (i.e., obsess or non-obese). We performed the same PS matching procedure and difference-in-difference method to estimate the risk difference.

## A. Empirical equipoise assessment

**Supp Figure 51.** Preference score distributions of COVID-19 positive and negative groups for non-obese children. A greater convergence of these distributions indicates a higher similarity in the predicted likelihood of being infected between the COVID-19 positive (red) and negative (blue) participants.


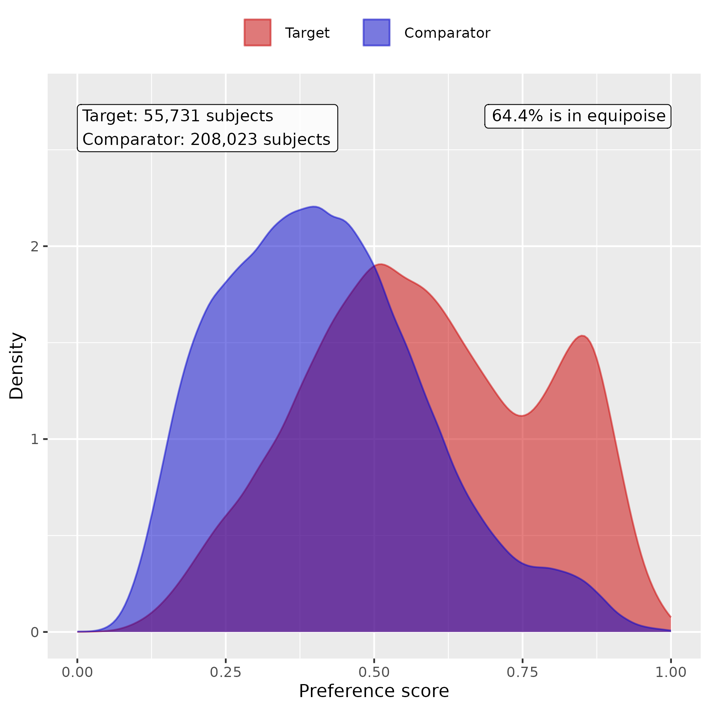


**Supp Figure 52.** Preference score distributions of COVID-19 positive and negative groups for obese children. A greater convergence of these distributions indicates a higher similarity in the predicted likelihood of being infected between the COVID-19 positive (red) and negative (blue) participants.


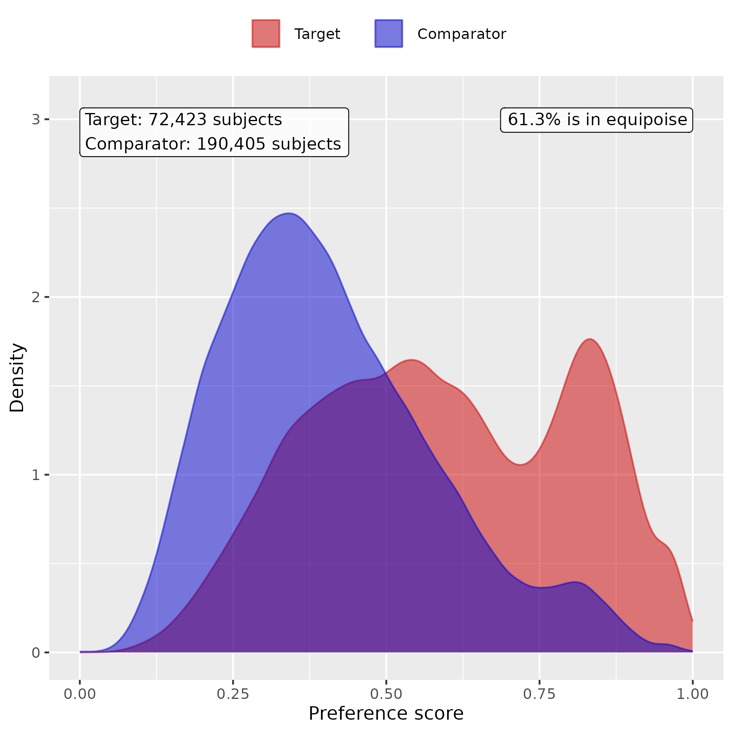


**Supp Figure 53.** Preference score distributions of COVID-19 positive and negative groups for non-obese youths. A greater convergence of these distributions indicates a higher similarity in the predicted likelihood of being infected between the COVID-19 positive (red) and negative (blue) participants.


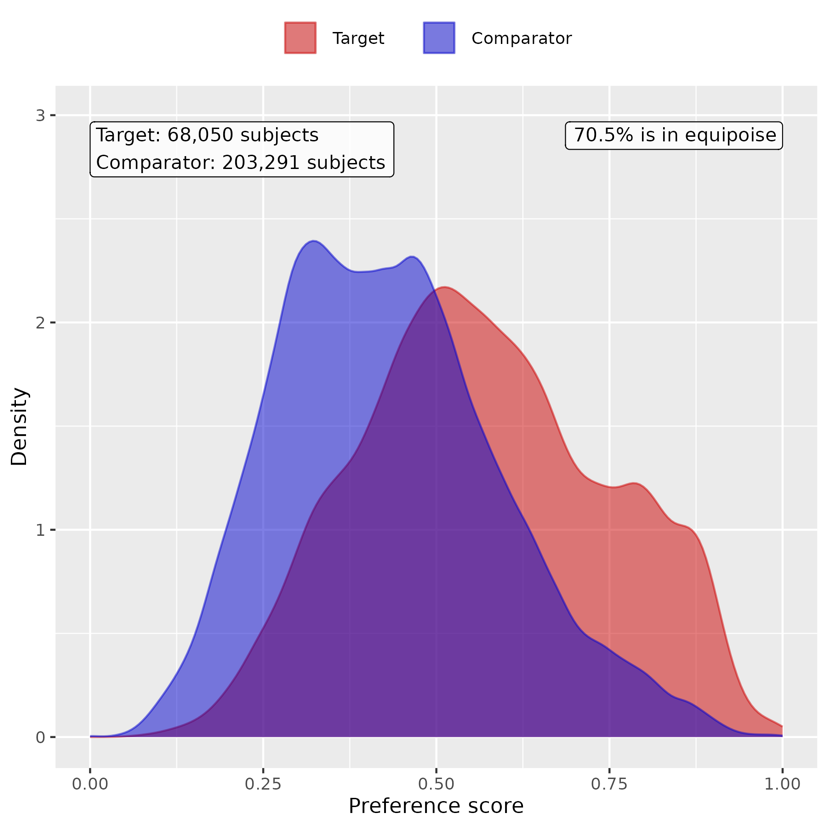


**Supp Figure 54.** Preference score distributions of COVID-19 positive and negative groups for obese youths. A greater convergence of these distributions indicates a higher similarity in the predicted likelihood of being infected between the COVID-19 positive (red) and negative (blue) participants.


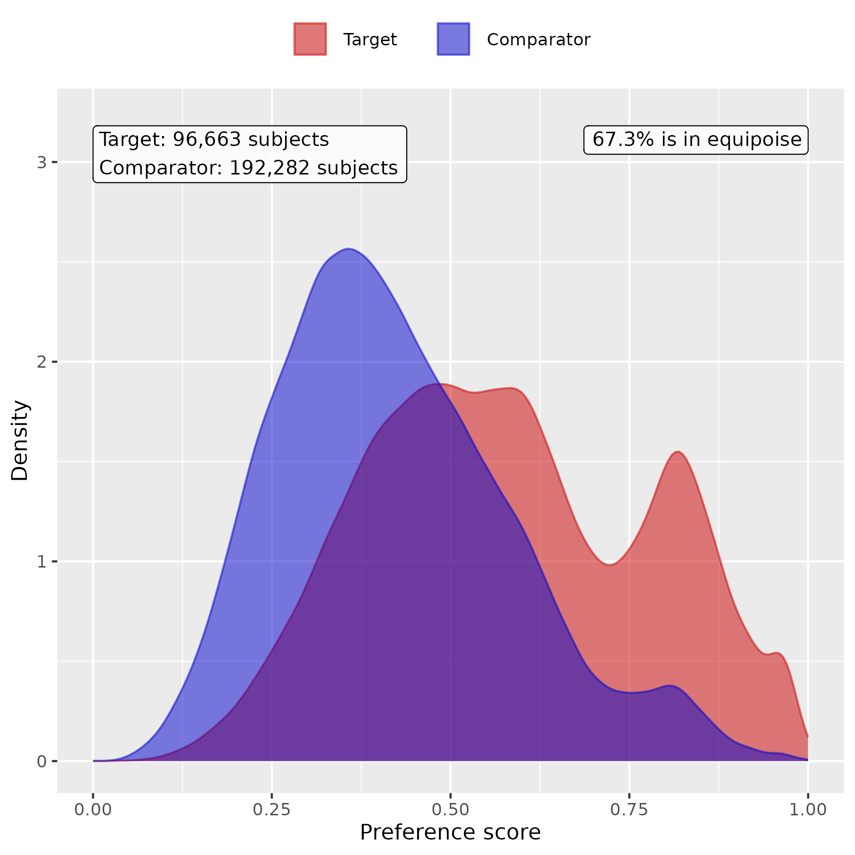


## B. Patient characteristic balance

**Supp Figure 55.** Patient characteristic balance before and after large-scale PS matching with ratio 1:2 for non-obese children. The upper panel displays the top 20 covariates with the largest standardized difference of means before matching, while the lower panel displays the top 20 covariates with the largest standardized difference of means after matching.


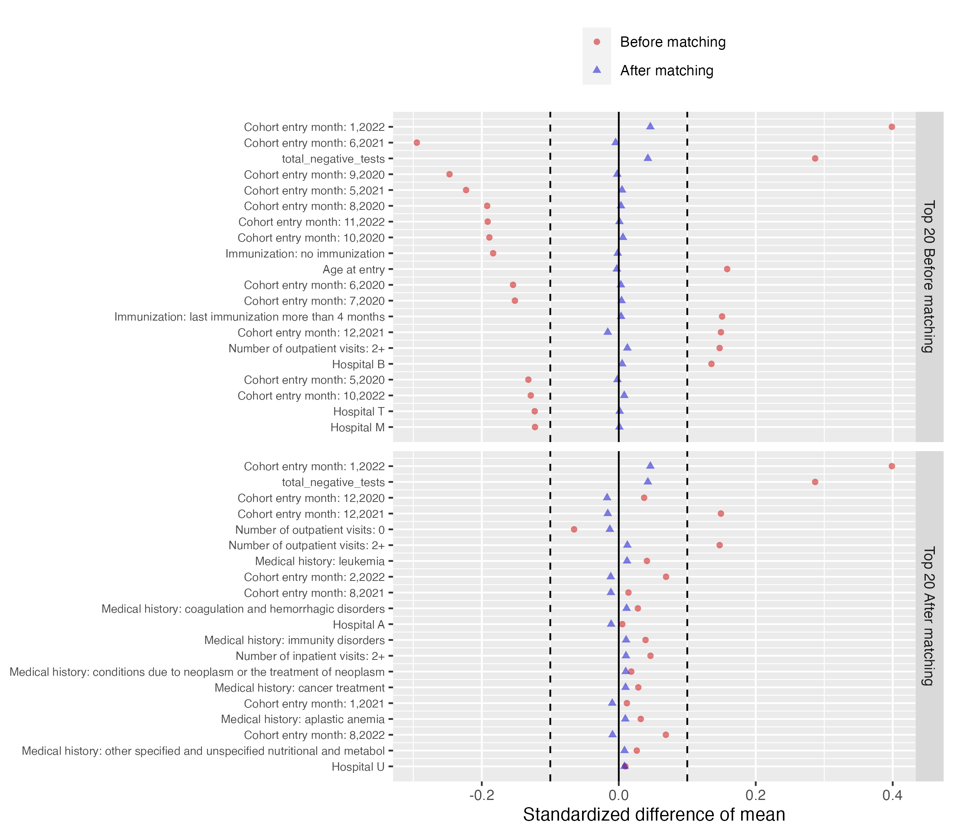


**Supp Figure 56.** Patient characteristic balance before and after large-scale PS matching with ratio 1:2 for obese children. The upper panel displays the top 20 covariates with the largest standardized difference of means before matching, while the lower panel displays the top 20 covariates with the largest standardized difference of means after matching.


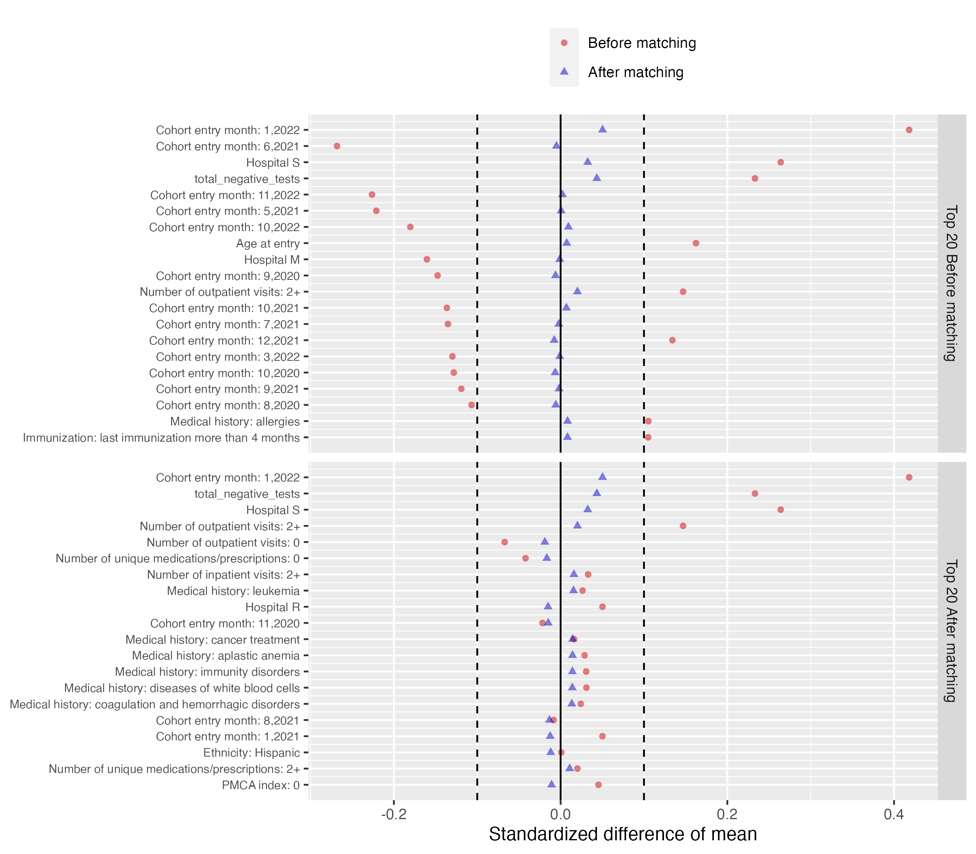


**Supp Figure 57.** Patient characteristic balance before and after large-scale PS matching with ratio 1:2 for non-obese youths. The upper panel displays the top 20 covariates with the largest standardized difference of means before matching, while the lower panel displays the top 20 covariates with the largest standardized difference of means after matching.


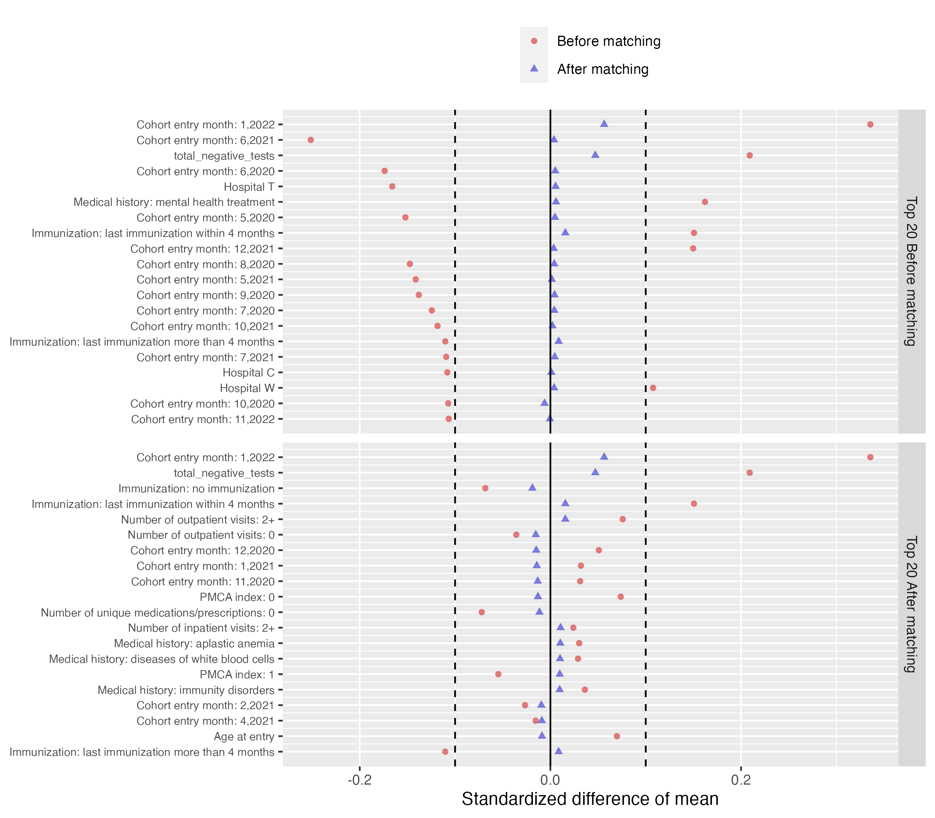


**Supp Figure 58.** Patient characteristic balance before and after large-scale PS matching with ratio 1:2 for obese youths. The upper panel displays the top 20 covariates with the largest standardized difference of means before matching, while the lower panel displays the top 20 covariates with the largest standardized difference of means after matching.


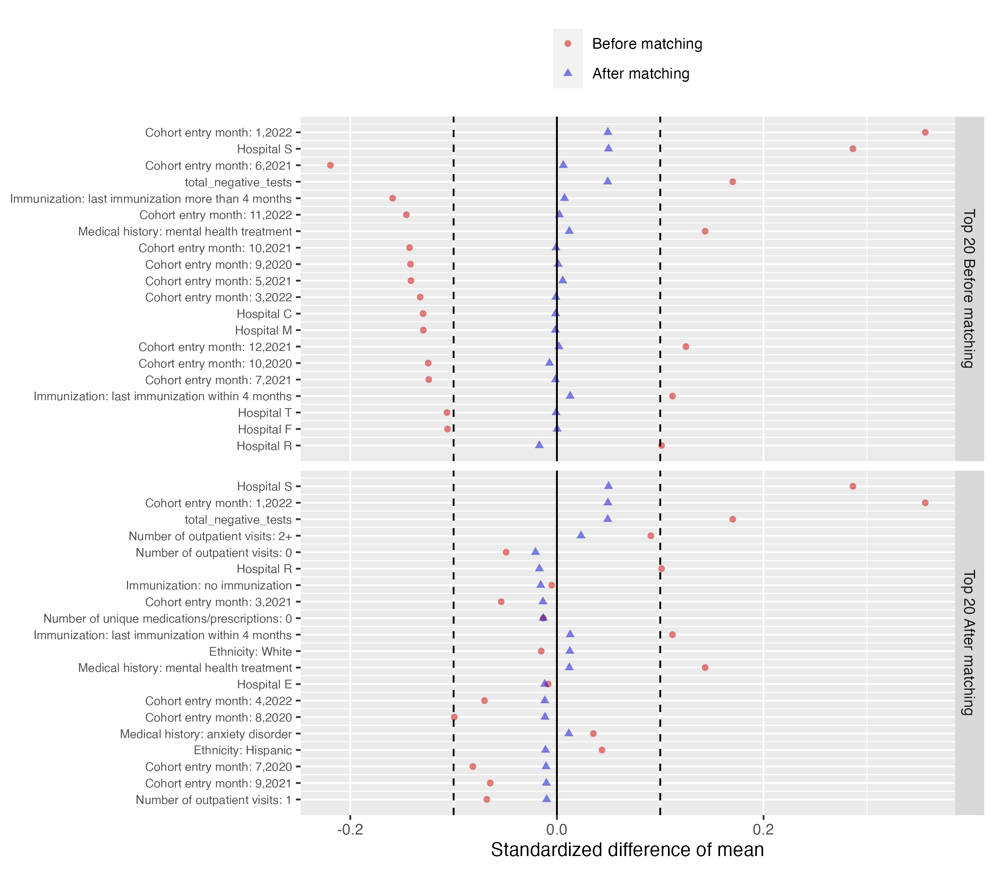


## C. Risk difference of COVID-19 positive group compared to COVID-19 negative group

**Supp Table 21.** Estimated risk difference in mental health conditions between the COVID-19 positive cohort and COVID-19 negative cohort for non-obese children

| **Category** | **Cluster** | **Risk difference (%)** | **95% CI (%)** | **P value** |
| --- | --- | --- | --- | --- |
| Composite | At least one incident | 1.001 | (0.508, 1.494) | <0.001 |
| Adverse childhood experiences | Emotional abuse | -0.001 | (-0.022, 0.020) | 0.923 |
|  | Neglect | 0 | (-0.020, 0.020) | 0.998 |
|  | Physical abuse | 0.029 | (-0.017, 0.076) | 0.215 |
|  | Sexual abuse | 0.008 | (-0.028, 0.043) | 0.673 |
| Anxiety disorders | Anxiety disorder | 0.296 | (0.076, 0.517) | 0.008 |
|  | OCD | 0.03 | (-0.030, 0.091) | 0.326 |
|  | Somatoform disorder | 0.07 | (-0.002, 0.142) | 0.058 |
|  | Stress disorder | 0.04 | (-0.122, 0.201) | 0.630 |
| Disruptive behavior disorders | Conduct disorder | -0.032 | (-0.133, 0.068) | 0.528 |
|  | Impulse control disorder | -0.03 | (-0.132, 0.073) | 0.572 |
|  | Oppositional defiant disorder | 0.036 | (-0.046, 0.117) | 0.394 |
| Eating and feeding disorders | Avoidant restrictive food intake | 0.058 | (-0.031, 0.146) | 0.201 |
|  | Other eating and feeding disorder | 0.007 | (-0.041, 0.056) | 0.766 |
| Elimination disorders | Encopresis | 0.025 | (-0.049, 0.100) | 0.502 |
|  | Enuresis | 0.037 | (-0.086, 0.161) | 0.554 |
| Gender dysphoria sexual dysfunction | Gender dysphoria | 0.007 | (-0.027, 0.041) | 0.687 |
|  | Paraphilia | 0 | (-0.004, 0.004) | 1.000 |
|  | Sexual dysfunction | -0.004 | (-0.009, 0.001) | 0.102 |
| Intentional self-harm/suicidality | Parasuicidality | 0.015 | (-0.028, 0.059) | 0.496 |
|  | Suicidality | 0.041 | (-0.019, 0.101) | 0.183 |
| Mood disorders | Bipolar disorder | 0.004 | (-0.029, 0.038) | 0.798 |
|  | Major depression | 0.024 | (-0.045, 0.093) | 0.497 |
|  | Minor depression | 0.068 | (-0.020, 0.156) | 0.129 |
| Neurocognitive disorders | Catatonia | 0.006 | (-0.004, 0.016) | 0.270 |
|  | Delirium | 0.048 | (0.004, 0.091) | 0.031 |
|  | Encephalopathy | 0.004 | (-0.027, 0.035) | 0.798 |
| Neurodevelopmental disorders | Academic developmental disorder | -0.001 | (-0.129, 0.127) | 0.986 |
|  | ADHD | 0.106 | (-0.200, 0.411) | 0.498 |
|  | Autism spectrum disorder | 0.137 | (-0.082, 0.356) | 0.219 |
|  | Communication motor disorder | 0.213 | (-0.022, 0.449) | 0.076 |
|  | Intellectual disability | 0.139 | (-0.031, 0.310) | 0.109 |
| Personality disorders | Personality disorder | -0.008 | (-0.028, 0.012) | 0.412 |
| Psychotic disorders | Psychotic disorder | -0.005 | (-0.025, 0.015) | 0.638 |
|  | Schizoaffective disorder | -0.001 | (-0.004, 0.002) | 0.450 |
|  | Schizophrenia | 0.004 | (-0.003, 0.011) | 0.284 |
| Sleep wake disorders | Hypersomnia | -0.008 | (-0.037, 0.021) | 0.595 |
|  | Insomnia | 0.029 | (-0.070, 0.128) | 0.565 |
|  | Parasomnias | 0.036 | (-0.037, 0.109) | 0.334 |
| Standalone symptoms | Anger aggression | 0.008 | (-0.073, 0.089) | 0.848 |
|  | Anxiety symptoms | 0.046 | (-0.029, 0.121) | 0.226 |
|  | Attention symptoms | 0.041 | (-0.062, 0.145) | 0.434 |
|  | Depressive symptoms | 0 | (-0.022, 0.022) | 1.000 |
|  | Hallucinations | -0.004 | (-0.032, 0.025) | 0.795 |
| Substance use and dependence | Alcohol | 0.001 | (-0.007, 0.009) | 0.840 |
|  | Opioid related | 0.002 | (-0.008, 0.012) | 0.663 |
|  | Other substances | 0.014 | (-0.002, 0.029) | 0.090 |
|  | THC | 0.001 | (-0.002, 0.004) | 0.450 |
|  | Tobacco | 0.002 | (-0.005, 0.009) | 0.538 |
| Tic disorders | Tic disorder | 0.106 | (0.013, 0.198) | 0.025 |

**Supp Table 22.** Estimated risk difference in mental health conditions between the COVID-19 positive cohort and COVID-19 negative cohort for obese children

| **Category** | **Cluster** | **Risk difference (%)** | **95% CI (%)** | **P value** |
| --- | --- | --- | --- | --- |
| Composite | At least one incident | 0.917 | (0.431, 1.404) | <0.001 |
| Adverse childhood experiences | Emotional abuse | -0.02 | (-0.053, 0.013) | 0.244 |
|  | Neglect | 0.016 | (-0.002, 0.034) | 0.073 |
|  | Physical abuse | 0.014 | (-0.034, 0.063) | 0.563 |
|  | Sexual abuse | 0.007 | (-0.031, 0.044) | 0.724 |
| Anxiety disorders | Anxiety disorder | 0.335 | (0.112, 0.558) | 0.003 |
|  | OCD | 0.039 | (-0.012, 0.090) | 0.137 |
|  | Somatoform disorder | -0.002 | (-0.075, 0.071) | 0.966 |
|  | Stress disorder | 0.136 | (-0.053, 0.326) | 0.158 |
| Disruptive behavior disorders | Conduct disorder | -0.005 | (-0.106, 0.097) | 0.925 |
|  | Impulse control disorder | -0.001 | (-0.094, 0.091) | 0.978 |
|  | Oppositional defiant disorder | 0.066 | (-0.020, 0.151) | 0.131 |
| Eating and feeding disorders | Avoidant restrictive food intake | -0.029 | (-0.111, 0.054) | 0.496 |
|  | Other eating and feeding disorder | -0.023 | (-0.063, 0.017) | 0.254 |
| Elimination disorders | Encopresis | 0.045 | (-0.007, 0.096) | 0.091 |
|  | Enuresis | 0.015 | (-0.099, 0.130) | 0.793 |
| Gender dysphoria sexual dysfunction | Gender dysphoria | -0.011 | (-0.038, 0.017) | 0.448 |
|  | Paraphilia | -0.001 | (-0.003, 0.001) | 0.441 |
|  | Sexual dysfunction | 0.002 | (-0.005, 0.008) | 0.624 |
| Intentional self-harm/suicidality | Parasuicidality | -0.003 | (-0.047, 0.041) | 0.893 |
|  | Suicidality | 0.016 | (-0.038, 0.071) | 0.558 |
| Mood disorders | Bipolar disorder | 0.033 | (-0.001, 0.068) | 0.057 |
|  | Major depression | -0.047 | (-0.121, 0.026) | 0.206 |
|  | Minor depression | -0.027 | (-0.119, 0.065) | 0.566 |
| Neurocognitive disorders | Catatonia | 0 | (-0.007, 0.006) | 0.926 |
|  | Delirium | 0.065 | (0.018, 0.113) | 0.007 |
|  | Encephalopathy | 0 | (-0.033, 0.034) | 0.978 |
| Neurodevelopmental disorders | Academic developmental disorder | 0.083 | (-0.043, 0.209) | 0.196 |
|  | ADHD | 0.364 | (0.058, 0.670) | 0.020 |
|  | Autism spectrum disorder | 0.178 | (-0.037, 0.392) | 0.104 |
|  | Communication motor disorder | 0.22 | (-0.007, 0.447) | 0.058 |
|  | Intellectual disability | 0.103 | (-0.054, 0.260) | 0.199 |
| Personality disorders | Personality disorder | 0.008 | (-0.015, 0.032) | 0.479 |
| Psychotic disorders | Psychotic disorder | 0.001 | (-0.028, 0.031) | 0.943 |
|  | Schizoaffective disorder | 0.003 | (-0.002, 0.007) | 0.301 |
|  | Schizophrenia | -0.002 | (-0.009, 0.006) | 0.617 |
| Sleep wake disorders | Hypersomnia | 0.011 | (-0.028, 0.049) | 0.588 |
|  | Insomnia | 0.023 | (-0.080, 0.127) | 0.658 |
|  | Parasomnias | 0.04 | (-0.029, 0.108) | 0.257 |
| Standalone symptoms | Anger aggression | 0.055 | (-0.026, 0.135) | 0.181 |
|  | Anxiety symptoms | 0.031 | (-0.047, 0.109) | 0.434 |
|  | Attention symptoms | -0.008 | (-0.111, 0.095) | 0.876 |
|  | Depressive symptoms | 0.01 | (-0.009, 0.029) | 0.285 |
|  | Hallucinations | 0.026 | (-0.005, 0.057) | 0.100 |
| Substance use and dependence | Alcohol | -0.007 | (-0.014, -0.000) | 0.045 |
|  | Opioid related | 0.001 | (-0.011, 0.013) | 0.882 |
|  | Other substances | 0.004 | (-0.015, 0.023) | 0.676 |
|  | THC | NA | NA | NA |
|  | Tobacco | -0.003 | (-0.011, 0.004) | 0.419 |
| Tic disorders | Tic disorder | -0.001 | (-0.081, 0.078) | 0.975 |

**Supp Table 23.** Estimated risk difference in mental health conditions between the COVID-19 positive cohort and COVID-19 negative cohort for non-obese youths

| **Category** | **Cluster** | **Risk difference (%)** | **95% CI (%)** | **P value** |
| --- | --- | --- | --- | --- |
| Composite | At least one incident | 0.683 | (0.187, 1.178) | 0.007 |
| Adverse childhood experiences | Emotional abuse | 0.004 | (-0.013, 0.021) | 0.656 |
|  | Neglect | 0.005 | (-0.013, 0.023) | 0.590 |
|  | Physical abuse | 0.028 | (-0.025, 0.081) | 0.301 |
|  | Sexual abuse | 0.007 | (-0.038, 0.053) | 0.747 |
| Anxiety disorders | Anxiety disorder | 0.328 | (-0.011, 0.667) | 0.058 |
|  | OCD | 0.031 | (-0.064, 0.126) | 0.518 |
|  | Somatoform disorder | 0.042 | (-0.054, 0.138) | 0.392 |
|  | Stress disorder | 0.018 | (-0.180, 0.216) | 0.860 |
| Disruptive behavior disorders | Conduct disorder | -0.027 | (-0.091, 0.037) | 0.415 |
|  | Impulse control disorder | -0.027 | (-0.113, 0.060) | 0.544 |
|  | Oppositional defiant disorder | 0.039 | (-0.036, 0.115) | 0.303 |
| Eating and feeding disorders | Avoidant restrictive food intake | -0.175 | (-0.329, -0.021) | 0.026 |
|  | Other eating and feeding disorder | -0.014 | (-0.051, 0.023) | 0.462 |
| Elimination disorders | Encopresis | 0.012 | (-0.016, 0.040) | 0.415 |
|  | Enuresis | -0.009 | (-0.063, 0.045) | 0.742 |
| Gender dysphoria sexual dysfunction | Gender dysphoria | -0.039 | (-0.122, 0.043) | 0.350 |
|  | Paraphilia | -0.003 | (-0.016, 0.010) | 0.693 |
|  | Sexual dysfunction | 0.008 | (-0.012, 0.029) | 0.437 |
| Intentional self-harm/suicidality | Parasuicidality | 0.036 | (-0.042, 0.115) | 0.367 |
|  | Suicidality | 0.095 | (-0.047, 0.237) | 0.189 |
| Mood disorders | Bipolar disorder | 0.01 | (-0.042, 0.061) | 0.711 |
|  | Major depression | -0.137 | (-0.389, 0.114) | 0.285 |
|  | Minor depression | 0.052 | (-0.204, 0.308) | 0.691 |
| Neurocognitive disorders | Catatonia | 0.002 | (-0.020, 0.024) | 0.874 |
|  | Delirium | 0.043 | (-0.042, 0.127) | 0.324 |
|  | Encephalopathy | 0.012 | (-0.024, 0.048) | 0.501 |
| Neurodevelopmental disorders | Academic developmental disorder | 0.037 | (-0.049, 0.123) | 0.400 |
|  | ADHD | 0.364 | (0.082, 0.646) | 0.011 |
|  | Autism spectrum disorder | 0.046 | (-0.099, 0.190) | 0.536 |
|  | Communication motor disorder | 0.075 | (-0.029, 0.179) | 0.156 |
|  | Intellectual disability | 0.061 | (-0.067, 0.189) | 0.352 |
| Personality disorders | Personality disorder | -0.002 | (-0.053, 0.048) | 0.927 |
| Psychotic disorders | Psychotic disorder | 0.004 | (-0.047, 0.055) | 0.875 |
|  | Schizoaffective disorder | -0.002 | (-0.024, 0.019) | 0.827 |
|  | Schizophrenia | -0.012 | (-0.047, 0.022) | 0.477 |
| Sleep wake disorders | Hypersomnia | -0.025 | (-0.072, 0.022) | 0.295 |
|  | Insomnia | 0.076 | (-0.038, 0.190) | 0.189 |
|  | Parasomnias | 0.02 | (-0.032, 0.072) | 0.458 |
| Standalone symptoms | Anger aggression | 0.011 | (-0.062, 0.084) | 0.769 |
|  | Anxiety symptoms | 0.103 | (0.024, 0.182) | 0.010 |
|  | Attention symptoms | 0.109 | (0.025, 0.192) | 0.011 |
|  | Depressive symptoms | 0.014 | (-0.015, 0.044) | 0.341 |
|  | Hallucinations | 0.006 | (-0.038, 0.049) | 0.797 |
| Substance use and dependence | Alcohol | -0.04 | (-0.081, 0.002) | 0.063 |
|  | Opioid related | 0 | (-0.025, 0.026) | 0.986 |
|  | Other substances | -0.026 | (-0.080, 0.028) | 0.347 |
|  | THC | -0.042 | (-0.112, 0.027) | 0.234 |
|  | Tobacco | -0.001 | (-0.087, 0.086) | 0.989 |
| Tic disorders | Tic disorder | 0.082 | (0.004, 0.159) | 0.039 |

**Supp Table 24.** Estimated risk difference in mental health conditions between the COVID-19 positive cohort and COVID-19 negative cohort for obese youths

| **Category** | **Cluster** | **Risk difference (%)** | **95% CI (%)** | **P value** |
| --- | --- | --- | --- | --- |
| Composite | At least one incident | 1.167 | (0.691, 1.642) | <0.001 |
| Adverse childhood experiences | Emotional abuse | 0.025 | (-0.000, 0.051) | 0.053 |
|  | Neglect | 0.001 | (-0.015, 0.017) | 0.919 |
|  | Physical abuse | 0.042 | (-0.004, 0.088) | 0.074 |
|  | Sexual abuse | 0.041 | (0.001, 0.081) | 0.045 |
| Anxiety disorders | Anxiety disorder | 0.364 | (0.035, 0.692) | 0.030 |
|  | OCD | 0.049 | (-0.027, 0.124) | 0.210 |
|  | Somatoform disorder | -0.049 | (-0.140, 0.041) | 0.287 |
|  | Stress disorder | 0.183 | (-0.035, 0.401) | 0.100 |
| Disruptive behavior disorders | Conduct disorder | -0.039 | (-0.103, 0.024) | 0.226 |
|  | Impulse control disorder | 0.034 | (-0.052, 0.120) | 0.439 |
|  | Oppositional defiant disorder | 0.033 | (-0.047, 0.113) | 0.421 |
| Eating and feeding disorders | Avoidant restrictive food intake | 0.037 | (-0.077, 0.151) | 0.524 |
|  | Other eating and feeding disorder | 0.02 | (-0.006, 0.047) | 0.128 |
| Elimination disorders | Encopresis | 0.015 | (-0.006, 0.035) | 0.162 |
|  | Enuresis | 0.02 | (-0.040, 0.079) | 0.514 |
| Gender dysphoria sexual dysfunction | Gender dysphoria | -0.035 | (-0.112, 0.043) | 0.381 |
|  | Paraphilia | -0.001 | (-0.009, 0.006) | 0.757 |
|  | Sexual dysfunction | 0.002 | (-0.017, 0.020) | 0.869 |
| Intentional self-harm/suicidality | Parasuicidality | 0.033 | (-0.032, 0.098) | 0.319 |
|  | Suicidality | 0.187 | (0.066, 0.307) | 0.002 |
| Mood disorders | Bipolar disorder | -0.042 | (-0.094, 0.011) | 0.120 |
|  | Major depression | -0.042 | (-0.286, 0.203) | 0.739 |
|  | Minor depression | 0.39 | (0.149, 0.632) | 0.002 |
| Neurocognitive disorders | Catatonia | 0.004 | (-0.012, 0.021) | 0.609 |
|  | Delirium | 0.137 | (0.054, 0.219) | 0.001 |
|  | Encephalopathy | 0.023 | (-0.009, 0.054) | 0.158 |
| Neurodevelopmental disorders | Academic developmental disorder | 0.064 | (-0.024, 0.151) | 0.153 |
|  | ADHD | 0.458 | (0.192, 0.724) | <0.001 |
|  | Autism spectrum disorder | 0.093 | (-0.056, 0.242) | 0.223 |
|  | Communication motor disorder | 0.071 | (-0.024, 0.166) | 0.142 |
|  | Intellectual disability | 0.159 | (0.037, 0.280) | 0.011 |
| Personality disorders | Personality disorder | -0.044 | (-0.094, 0.005) | 0.081 |
| Psychotic disorders | Psychotic disorder | 0 | (-0.052, 0.051) | 0.986 |
|  | Schizoaffective disorder | -0.004 | (-0.024, 0.017) | 0.731 |
|  | Schizophrenia | -0.01 | (-0.041, 0.021) | 0.530 |
| Sleep wake disorders | Hypersomnia | 0.017 | (-0.034, 0.068) | 0.513 |
|  | Insomnia | 0.153 | (0.032, 0.274) | 0.013 |
|  | Parasomnias | 0.049 | (0.001, 0.097) | 0.048 |
| Standalone symptoms | Anger aggression | 0.07 | (-0.004, 0.143) | 0.063 |
|  | Anxiety symptoms | 0.03 | (-0.038, 0.098) | 0.390 |
|  | Attention symptoms | 0.061 | (-0.016, 0.139) | 0.122 |
|  | Depressive symptoms | 0.029 | (0.003, 0.055) | 0.029 |
|  | Hallucinations | 0.012 | (-0.031, 0.054) | 0.596 |
| Substance use and dependence | Alcohol | 0.016 | (-0.020, 0.052) | 0.375 |
|  | Opioid related | -0.002 | (-0.027, 0.024) | 0.904 |
|  | Other substances | 0.01 | (-0.041, 0.061) | 0.707 |
|  | THC | -0.012 | (-0.071, 0.047) | 0.690 |
|  | Tobacco | 0.051 | (-0.031, 0.134) | 0.221 |
| Tic disorders | Tic disorder | 0.018 | (-0.048, 0.085) | 0.593 |

# Section 11 Supplemental Results: sensitivity analysis for subgroups with different hospitalization status

We conducted sensitivity analyses on both cohorts stratified by the hospitalization status (i.e, non-hospitalized, hospitalized, admitted to ICU). We performed the same PS matching procedure and difference-in-difference method to estimate the risk difference.

## A. Empirical equipoise assessment

**Supp Figure 59.** Preference score distributions of COVID-19 positive and negative groups for non-hospitalized children. A greater convergence of these distributions indicates a higher similarity in the predicted likelihood of being infected between the COVID-19 positive (red) and negative (blue) participants.


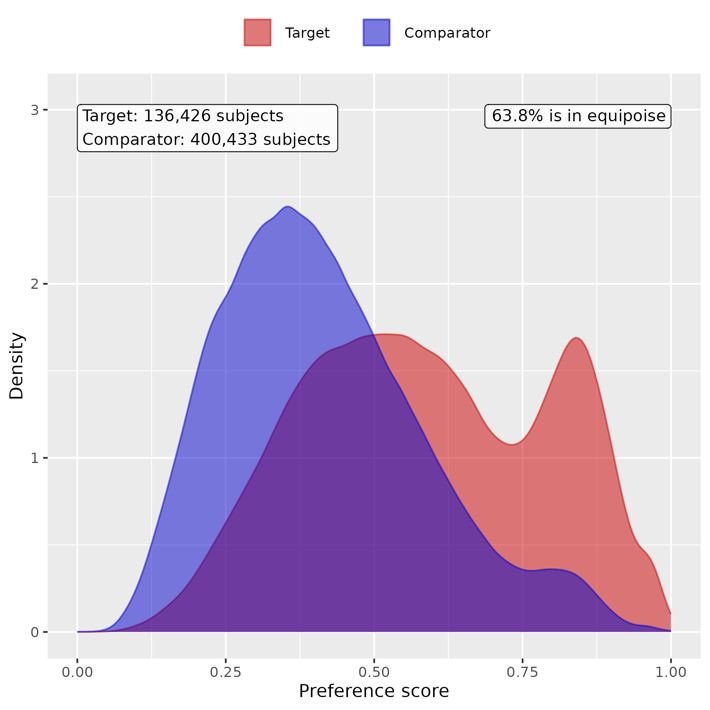


**Supp Figure 60.** Preference score distributions of COVID-19 positive and negative groups for hospitalized children. A greater convergence of these distributions indicates a higher similarity in the predicted likelihood of being infected between the COVID-19 positive (red) and negative (blue) participants.


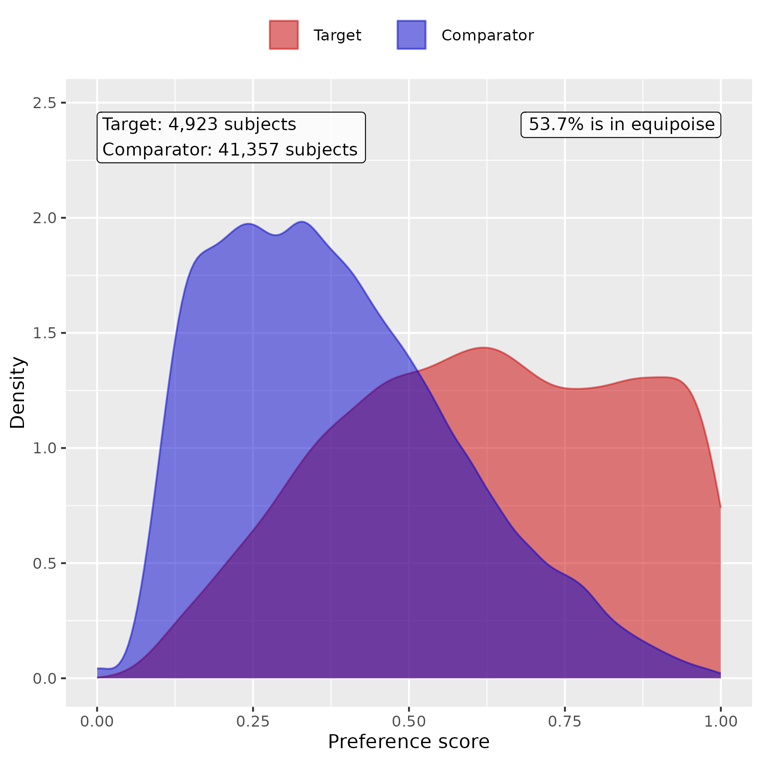


**Supp Figure 61.** Preference score distributions of COVID-19 positive and negative groups for children admitted to ICU. A greater convergence of these distributions indicates a higher similarity in the predicted likelihood of being infected between the COVID-19 positive (red) and negative (blue) participants.


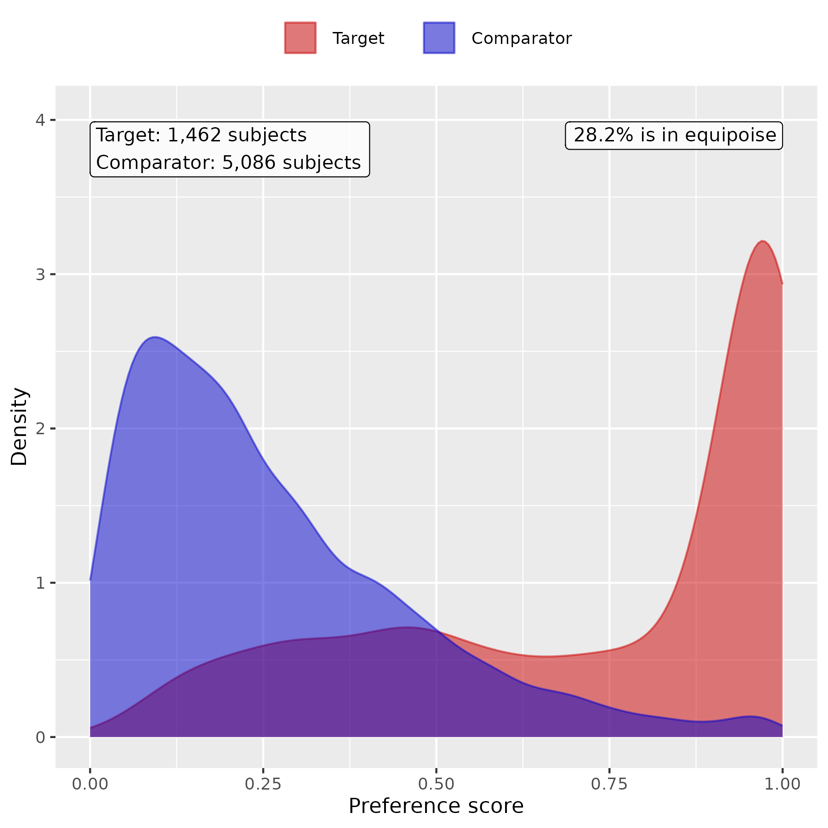


**Supp Figure 62.** Preference score distributions of COVID-19 positive and negative groups for non-hospitalized youths. A greater convergence of these distributions indicates a higher similarity in the predicted likelihood of being infected between the COVID-19 positive (red) and negative (blue) participants.


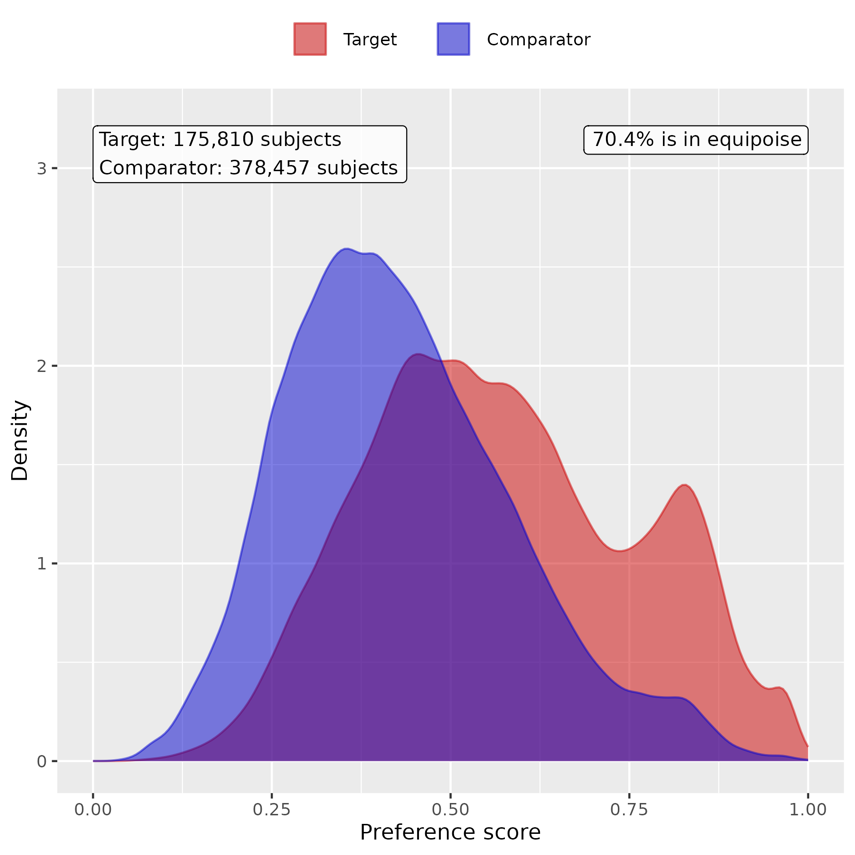


**Supp Figure 63.** Preference score distributions of COVID-19 positive and negative groups for hospitalized youths. A greater convergence of these distributions indicates a higher similarity in the predicted likelihood of being infected between the COVID-19 positive (red) and negative (blue) participants.


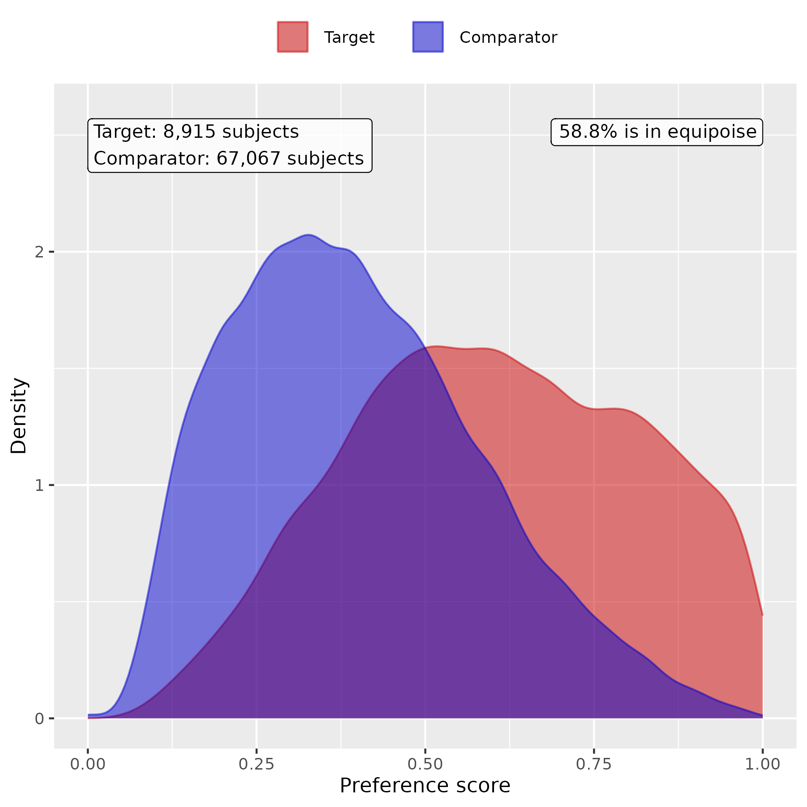


**Supp Figure 64.** Preference score distributions of COVID-19 positive and COVID-19 negative groups for youths admitted to ICU. A greater convergence of these distributions indicates a higher similarity in the predicted likelihood of being infected between the COVID-19 positive (red) and negative (blue) participants.


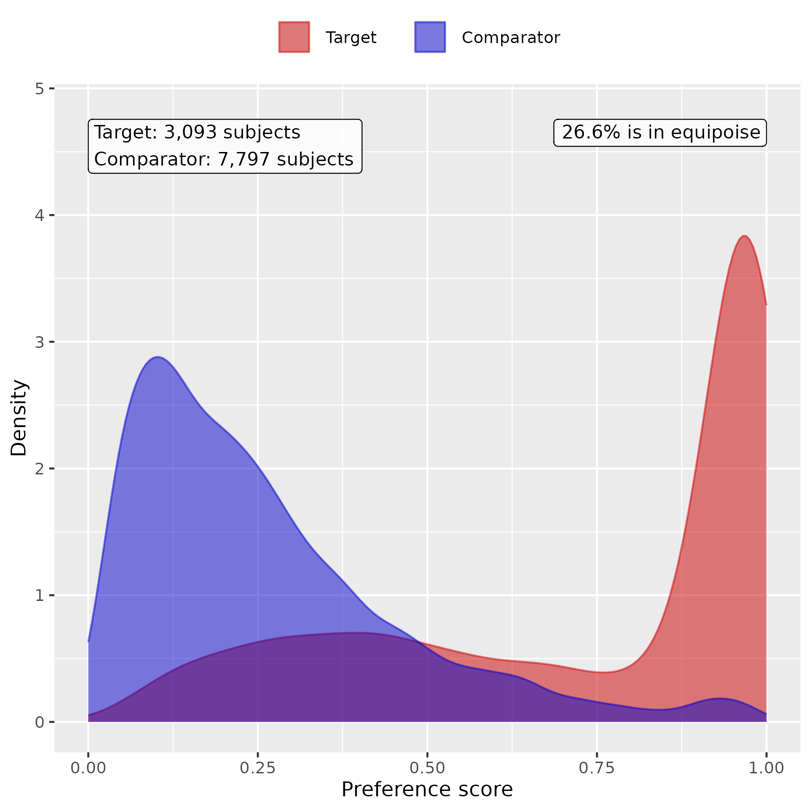


## B. Patient characteristic balance

**Supp Figure 65.** Patient characteristic balance before and after large-scale PS matching with ratio 1:2 for non-hospitalized children. The upper panel displays the top 20 covariates with the largest standardized difference of means before matching, while the lower panel displays the top 20 covariates with the largest standardized difference of means after matching.


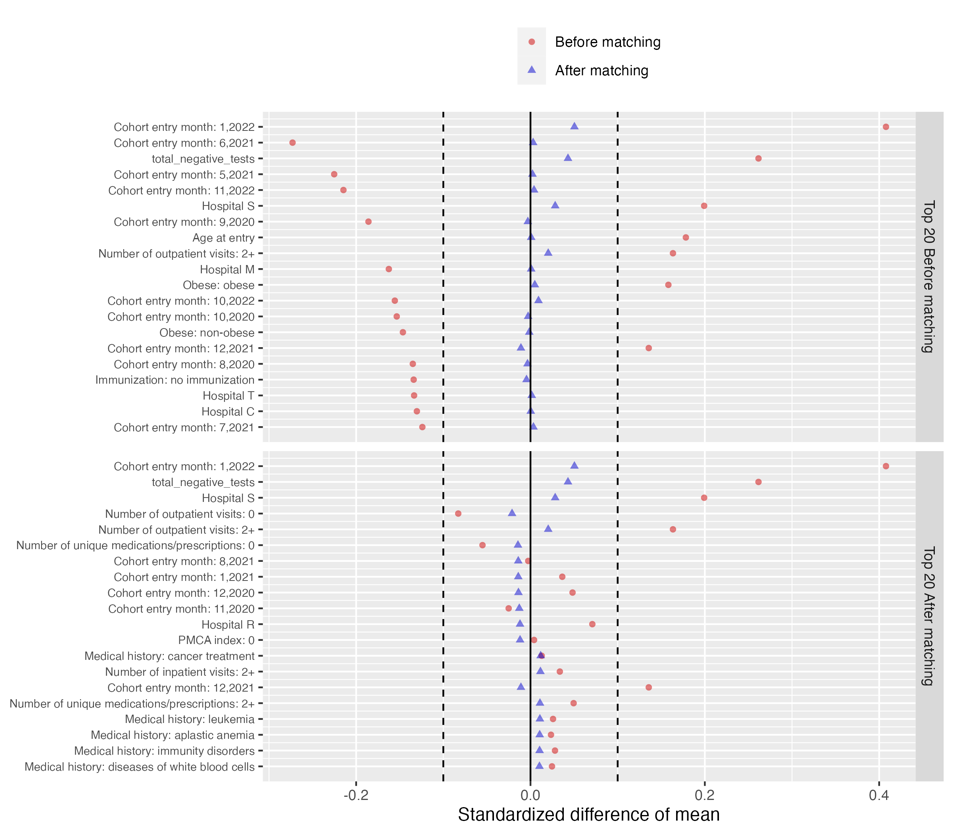


**Supp Figure 66.** Patient characteristic balance before and after large-scale PS matching with ratio 1:2 for hospitalized children. The upper panel displays the top 20 covariates with the largest standardized difference of means before matching, while the lower panel displays the top 20 covariates with the largest standardized difference of means after matching.


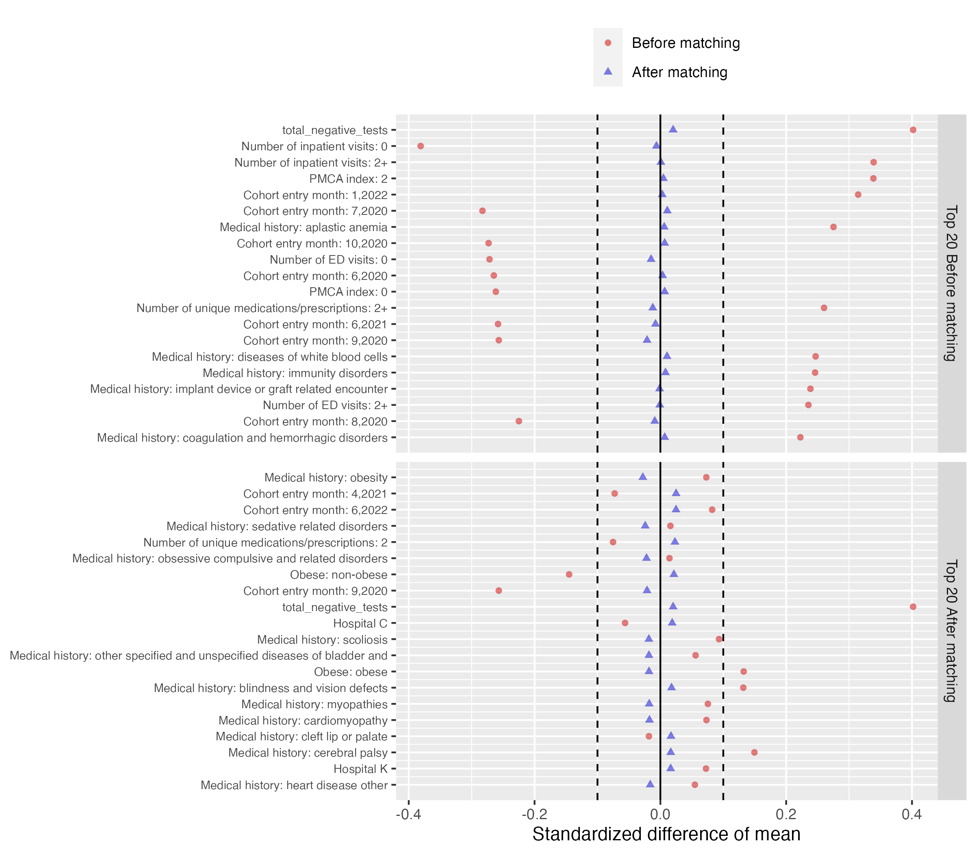


**Supp Figure 67.** Patient characteristic balance before and after large-scale PS matching with ratio 1:2 for children admitted to ICU.The upper panel displays the top 20 covariates with the largest standardized difference of means before matching, while the lower panel displays the top 20 covariates with the largest standardized difference of means after matching.


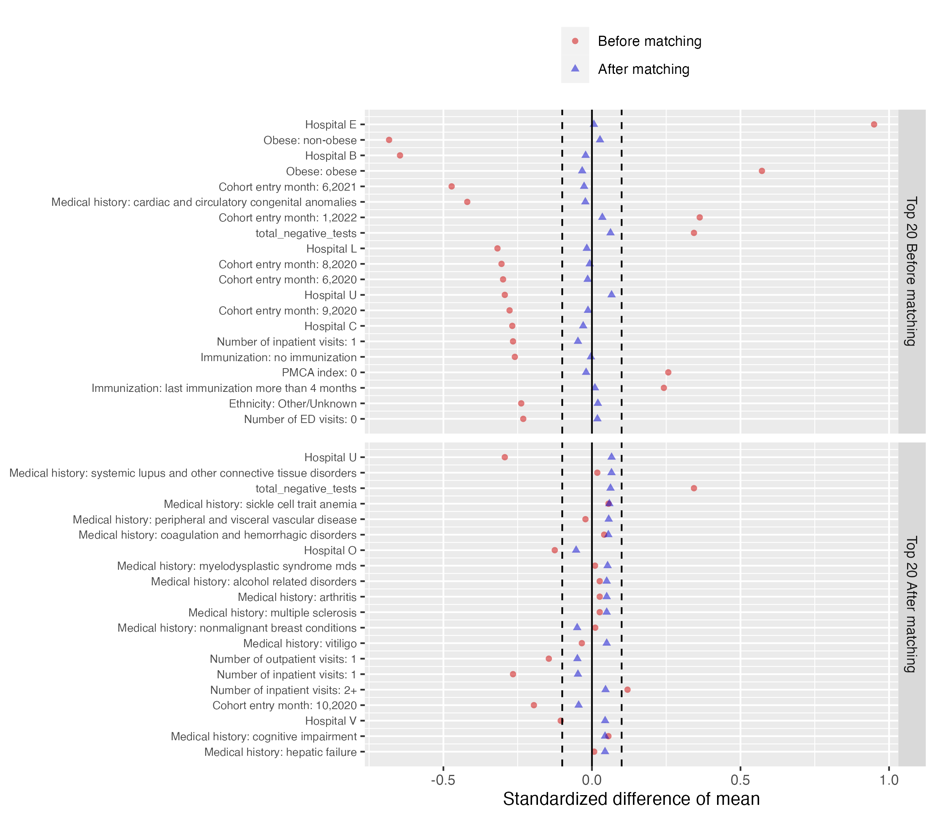


**Supp Figure 68.** Patient characteristic balance before and after large-scale PS matching with ratio 1:2 for non-hospitalized youths. The upper panel displays the top 20 covariates with the largest standardized difference of means before matching, while the lower panel displays the top 20 covariates with the largest standardized difference of means after matching.


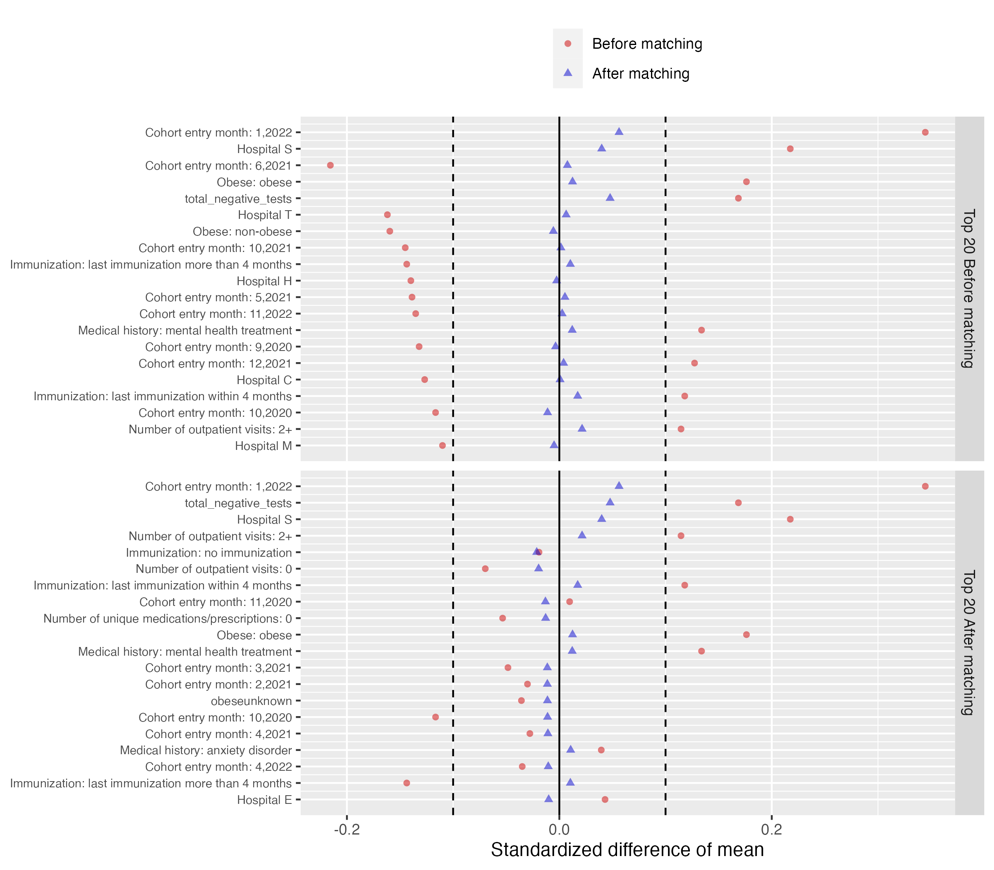


**Supp Figure 69.** Patient characteristic balance before and after large-scale PS matching with ratio 1:2 for hospitalized youths. The upper panel displays the top 20 covariates with the largest standardized difference of means before matching, while the lower panel displays the top 20 covariates with the largest standardized difference of means after matching.


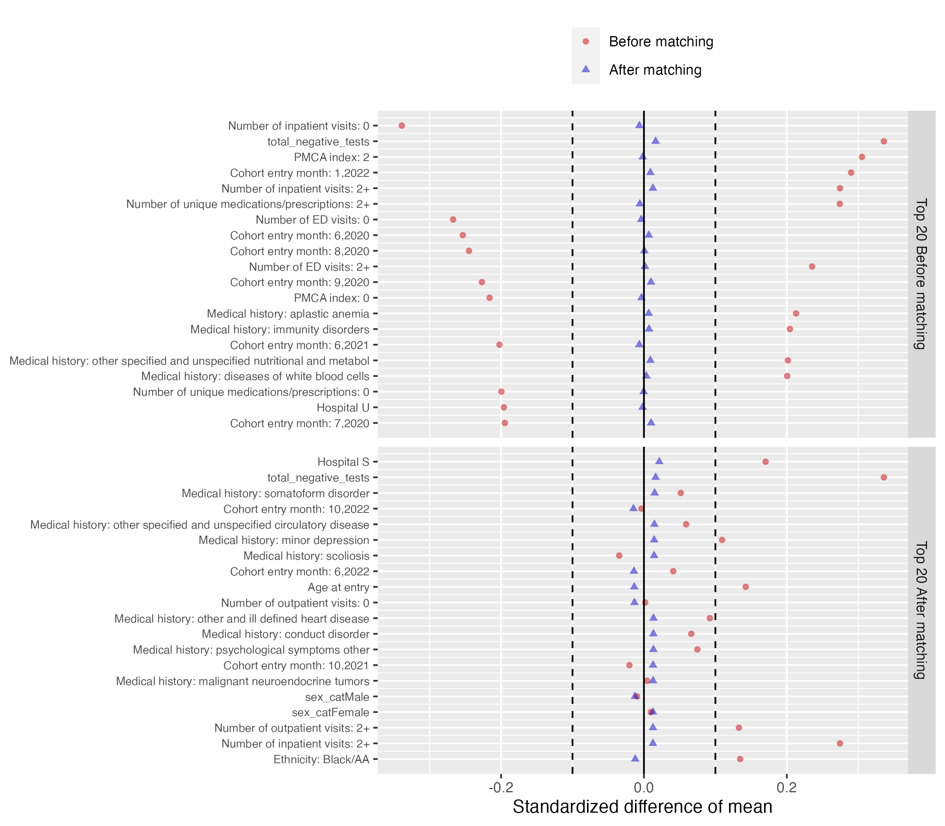


**Supp Figure 70.** Patient characteristic balance before and after large-scale PS matching with ratio 1:2 for youths admitted to ICU. The upper panel displays the top 20 covariates with the largest standardized difference of means before matching, while the lower panel displays the top 20 covariates with the largest standardized difference of means after matching.


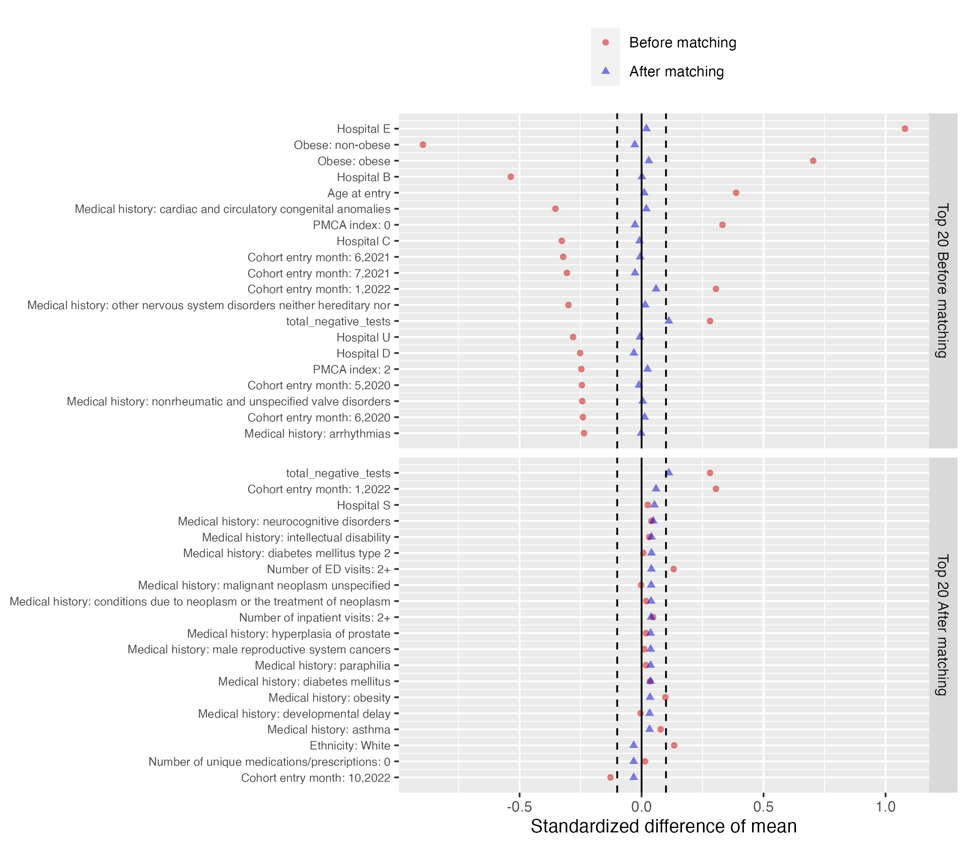


## C. Risk difference of COVID-19 positive group compared to COVID-19 negative group

**Supp Table 25.** Estimated risk difference in mental health conditions between the COVID-19 positive cohort and COVID-19 negative cohort for non-hospitalized children

| **Category** | **Cluster** | **Risk difference (%)** | **95% CI (%)** | **P value** |
| --- | --- | --- | --- | --- |
| Composite | At least one incident | 0.774 | (0.453, 1.096) | <0.001 |
| Adverse childhood experiences | Emotional abuse | -0.006 | (-0.025, 0.013) | 0.515 |
|  | Neglect | 0.002 | (-0.010, 0.014) | 0.721 |
|  | Physical abuse | 0.02 | (-0.010, 0.051) | 0.194 |
|  | Sexual abuse | 0.01 | (-0.014, 0.034) | 0.430 |
| Anxiety disorders | Anxiety disorder | 0.295 | (0.151, 0.439) | <0.001 |
|  | OCD | 0.035 | (-0.001, 0.071) | 0.055 |
|  | Somatoform disorder | 0.025 | (-0.022, 0.072) | 0.299 |
|  | Stress disorder | 0.123 | (0.005, 0.242) | 0.042 |
| Disruptive behavior disorders | Conduct disorder | -0.009 | (-0.075, 0.057) | 0.787 |
|  | Impulse control disorder | -0.021 | (-0.083, 0.041) | 0.503 |
|  | Oppositional defiant disorder | 0.042 | (-0.013, 0.097) | 0.137 |
| Eating and feeding disorders | Avoidant restrictive food intake | 0.027 | (-0.027, 0.081) | 0.328 |
|  | Other eating and feeding disorder | -0.009 | (-0.036, 0.018) | 0.510 |
| Elimination disorders | Encopresis | 0.033 | (-0.006, 0.071) | 0.096 |
|  | Enuresis | 0.014 | (-0.065, 0.092) | 0.734 |
| Gender dysphoria sexual dysfunction | Gender dysphoria | -0.008 | (-0.028, 0.011) | 0.409 |
|  | Paraphilia | -0.001 | (-0.003, 0.001) | 0.280 |
|  | Sexual dysfunction | 0.001 | (-0.003, 0.004) | 0.663 |
| Intentional self-harm/suicidality | Parasuicidality | 0 | (-0.027, 0.026) | 0.976 |
|  | Suicidality | 0.01 | (-0.026, 0.046) | 0.576 |
| Mood disorders | Bipolar disorder | 0.023 | (0.001, 0.046) | 0.042 |
|  | Major depression | -0.009 | (-0.054, 0.036) | 0.685 |
|  | Minor depression | 0.001 | (-0.057, 0.059) | 0.976 |
| Neurocognitive disorders | Catatonia | 0 | (-0.004, 0.003) | 0.799 |
|  | Delirium | 0.038 | (0.012, 0.064) | 0.004 |
|  | Encephalopathy | 0.002 | (-0.016, 0.019) | 0.844 |
| Neurodevelopmental disorders | Academic developmental disorder | 0.033 | (-0.050, 0.115) | 0.436 |
|  | ADHD | 0.152 | (-0.050, 0.353) | 0.141 |
|  | Autism spectrum disorder | 0.158 | (0.020, 0.297) | 0.025 |
|  | Communication motor disorder | 0.157 | (0.009, 0.305) | 0.038 |
|  | Intellectual disability | 0.095 | (-0.002, 0.193) | 0.056 |
| Personality disorders | Personality disorder | 0.003 | (-0.011, 0.017) | 0.681 |
| Psychotic disorders | Psychotic disorder | 0.001 | (-0.015, 0.017) | 0.914 |
|  | Schizoaffective disorder | 0.002 | (-0.000, 0.005) | 0.072 |
|  | Schizophrenia | -0.001 | (-0.005, 0.003) | 0.470 |
| Sleep wake disorders | Hypersomnia | 0.003 | (-0.019, 0.025) | 0.784 |
|  | Insomnia | -0.001 | (-0.065, 0.063) | 0.980 |
|  | Parasomnias | 0.021 | (-0.024, 0.066) | 0.360 |
| Standalone symptoms | Anger aggression | 0.035 | (-0.016, 0.087) | 0.178 |
|  | Anxiety symptoms | 0.047 | (-0.001, 0.096) | 0.055 |
|  | Attention symptoms | -0.005 | (-0.073, 0.062) | 0.875 |
|  | Depressive symptoms | 0.007 | (-0.007, 0.021) | 0.324 |
|  | Hallucinations | 0.009 | (-0.010, 0.028) | 0.351 |
| Substance use and dependence | Alcohol | -0.002 | (-0.006, 0.001) | 0.203 |
|  | Opioid related | 0.003 | (-0.003, 0.008) | 0.317 |
|  | Other substances | 0.004 | (-0.006, 0.013) | 0.438 |
|  | THC | 0 | (-0.001, 0.002) | 0.445 |
|  | Tobacco | 0 | (-0.004, 0.005) | 0.844 |
| Tic disorders | Tic disorder | 0.048 | (-0.008, 0.104) | 0.092 |

**Supp Table 26.** Estimated risk difference in mental health conditions between the COVID-19 positive cohort and COVID-19 negative cohort for hospitalized children

| **Category** | **Cluster** | **Risk difference (%)** | **95% CI (%)** | **P value** |
| --- | --- | --- | --- | --- |
| Composite | At least one incident | 4.222 | (2.051, 6.393) | <0.001 |
| Adverse childhood experiences | Emotional abuse | -0.058 | (-0.135, 0.020) | 0.145 |
|  | Neglect | 0.076 | (-0.029, 0.181) | 0.157 |
|  | Physical abuse | 0.023 | (-0.263, 0.308) | 0.877 |
|  | Sexual abuse | 0.058 | (-0.104, 0.219) | 0.484 |
| Anxiety disorders | Anxiety disorder | 1.762 | (0.694, 2.830) | 0.001 |
|  | OCD | 0.151 | (-0.097, 0.400) | 0.233 |
|  | Somatoform disorder | 0.254 | (-0.121, 0.628) | 0.184 |
|  | Stress disorder | 0.532 | (-0.253, 1.316) | 0.184 |
| Disruptive behavior disorders | Conduct disorder | -0.362 | (-0.857, 0.134) | 0.153 |
|  | Impulse control disorder | 0.165 | (-0.375, 0.705) | 0.550 |
|  | Oppositional defiant disorder | 0.038 | (-0.320, 0.397) | 0.834 |
| Eating and feeding disorders | Avoidant restrictive food intake | 0.43 | (-0.078, 0.938) | 0.097 |
|  | Other eating and feeding disorder | 0.091 | (-0.195, 0.377) | 0.531 |
| Elimination disorders | Encopresis | -0.127 | (-0.480, 0.226) | 0.480 |
|  | Enuresis | 0.211 | (-0.251, 0.673) | 0.371 |
| Gender dysphoria sexual dysfunction | Gender dysphoria | 0.03 | (-0.131, 0.191) | 0.715 |
|  | Paraphilia | NA | NA | NA |
|  | Sexual dysfunction | NA | NA | NA |
| Intentional self-harm/suicidality | Parasuicidality | 0.199 | (-0.080, 0.478) | 0.162 |
|  | Suicidality | 0.146 | (-0.247, 0.538) | 0.466 |
| Mood disorders | Bipolar disorder | 0.133 | (-0.069, 0.336) | 0.197 |
|  | Major depression | -0.086 | (-0.485, 0.313) | 0.672 |
|  | Minor depression | 0.41 | (-0.029, 0.850) | 0.067 |
| Neurocognitive disorders | Catatonia | 0.076 | (-0.019, 0.171) | 0.118 |
|  | Delirium | 0.079 | (-0.330, 0.489) | 0.704 |
|  | Encephalopathy | 0.202 | (-0.104, 0.508) | 0.197 |
| Neurodevelopmental disorders | Academic developmental disorder | 0.32 | (-0.155, 0.794) | 0.187 |
|  | ADHD | 0.684 | (-0.469, 1.838) | 0.245 |
|  | Autism spectrum disorder | 0.925 | (-0.215, 2.065) | 0.112 |
|  | Communication motor disorder | 0.899 | (-0.308, 2.106) | 0.144 |
|  | Intellectual disability | 1.021 | (-0.198, 2.239) | 0.101 |
| Personality disorders | Personality disorder | 0.068 | (-0.081, 0.216) | 0.372 |
| Psychotic disorders | Psychotic disorder | 0.11 | (-0.061, 0.280) | 0.207 |
|  | Schizoaffective disorder | NA | NA | NA |
|  | Schizophrenia | 0.034 | (-0.044, 0.111) | 0.393 |
| Sleep wake disorders | Hypersomnia | 0.141 | (-0.041, 0.322) | 0.129 |
|  | Insomnia | 0.235 | (-0.355, 0.825) | 0.436 |
|  | Parasomnias | 0.174 | (-0.233, 0.582) | 0.401 |
| Standalone symptoms | Anger aggression | 0.39 | (-0.109, 0.888) | 0.125 |
|  | Anxiety symptoms | 0.614 | (0.085, 1.143) | 0.023 |
|  | Attention symptoms | 0.529 | (0.073, 0.984) | 0.023 |
|  | Depressive symptoms | 0.036 | (-0.069, 0.140) | 0.505 |
|  | Hallucinations | -0.036 | (-0.248, 0.176) | 0.742 |
| Substance use and dependence | Alcohol | -0.022 | (-0.054, 0.010) | 0.175 |
|  | Opioid related | 0.049 | (-0.102, 0.201) | 0.523 |
|  | Other substances | 0.111 | (-0.073, 0.296) | 0.236 |
|  | THC | 0.012 | (-0.020, 0.044) | 0.461 |
|  | Tobacco | -0.012 | (-0.044, 0.020) | 0.461 |
| Tic disorders | Tic disorder | 0.157 | (-0.217, 0.532) | 0.411 |

**Supp Table 27.** Estimated risk difference in mental health conditions between the COVID-19 positive cohort and COVID-19 negative cohort for children admitted to ICU

| **Category** | **Cluster** | **Risk difference (%)** | **95% CI (%)** | **P value** |
| --- | --- | --- | --- | --- |
| Composite | At least one incident | 5.338 | (-0.107, 10.782) | 0.055 |
| Adverse childhood experiences | Emotional abuse | -0.13 | (-0.323, 0.063) | 0.187 |
|  | Neglect | 0.354 | (-0.032, 0.740) | 0.072 |
|  | Physical abuse | 0.334 | (-0.305, 0.974) | 0.305 |
|  | Sexual abuse | 0.185 | (-0.246, 0.617) | 0.401 |
| Anxiety disorders | Anxiety disorder | 2.873 | (0.511, 5.236) | 0.017 |
|  | OCD | 0.055 | (-0.331, 0.441) | 0.779 |
|  | Somatoform disorder | 0.744 | (-0.219, 1.706) | 0.130 |
|  | Stress disorder | 0.552 | (-1.298, 2.402) | 0.559 |
| Disruptive behavior disorders | Conduct disorder | 0.334 | (-0.835, 1.504) | 0.575 |
|  | Impulse control disorder | 0.26 | (-0.511, 1.031) | 0.509 |
|  | Oppositional defiant disorder | 0.799 | (0.005, 1.592) | 0.049 |
| Eating and feeding disorders | Avoidant restrictive food intake | 0.614 | (-0.290, 1.517) | 0.183 |
|  | Other eating and feeding disorder | 0.185 | (-0.455, 0.825) | 0.571 |
| Elimination disorders | Encopresis | -0.13 | (-0.640, 0.381) | 0.618 |
|  | Enuresis | 0.818 | (-0.125, 1.761) | 0.089 |
| Gender dysphoria sexual dysfunction | Gender dysphoria | 0.055 | (-0.417, 0.528) | 0.819 |
|  | Paraphilia | NA | NA | NA |
|  | Sexual dysfunction | NA | NA | NA |
| Intentional self-harm/suicidality | Parasuicidality | 0.26 | (-0.286, 0.805) | 0.351 |
|  | Suicidality | 0.13 | (-0.381, 0.640) | 0.618 |
| Mood disorders | Bipolar disorder | 0.11 | (-0.362, 0.583) | 0.647 |
|  | Major depression | -0.13 | (-0.769, 0.509) | 0.690 |
|  | Minor depression | 0.834 | (-0.025, 1.694) | 0.057 |
| Neurocognitive disorders | Catatonia | 0.334 | (0.000, 0.669) | 0.050 |
|  | Delirium | 0.39 | (-1.106, 1.885) | 0.610 |
|  | Encephalopathy | 0.276 | (-0.541, 1.093) | 0.508 |
| Neurodevelopmental disorders | Academic developmental disorder | -0.094 | (-1.279, 1.090) | 0.876 |
|  | ADHD | 1.591 | (-0.995, 4.177) | 0.228 |
|  | Autism spectrum disorder | -0.338 | (-2.846, 2.170) | 0.792 |
|  | Communication motor disorder | 1.094 | (-2.089, 4.277) | 0.501 |
|  | Intellectual disability | 0.468 | (-3.005, 3.940) | 0.792 |
| Personality disorders | Personality disorder | 0.185 | (-0.246, 0.617) | 0.401 |
| Psychotic disorders | Psychotic disorder | 0.055 | (-0.417, 0.528) | 0.819 |
|  | Schizoaffective disorder | NA | NA | NA |
|  | Schizophrenia | 0.13 | (-0.063, 0.323) | 0.187 |
| Sleep wake disorders | Hypersomnia | -0.221 | (-0.888, 0.446) | 0.517 |
|  | Insomnia | -0.094 | (-1.529, 1.341) | 0.898 |
|  | Parasomnias | -0.445 | (-1.445, 0.555) | 0.383 |
| Standalone symptoms | Anger aggression | 0.688 | (-0.106, 1.482) | 0.089 |
|  | Anxiety symptoms | 0.669 | (-0.791, 2.129) | 0.369 |
|  | Attention symptoms | 0.614 | (-0.661, 1.888) | 0.345 |
|  | Depressive symptoms | 0.055 | (-0.218, 0.328) | 0.692 |
|  | Hallucinations | -0.224 | (-0.734, 0.286) | 0.390 |
| Substance use and dependence | Alcohol | NA | NA | NA |
|  | Opioid related | -0.019 | (-0.598, 0.559) | 0.947 |
|  | Other substances | 0.5 | (-0.010, 1.010) | 0.055 |
|  | THC | NA | NA | NA |
|  | Tobacco | NA | NA | NA |
| Tic disorders | Tic disorder | 0.205 | (-0.341, 0.750) | 0.462 |

**Supp Table 28.** Estimated risk difference in mental health conditions between the COVID-19 positive cohort and COVID-19 negative cohort for non-hospitalized youths

| **Category** | **Cluster** | **Risk difference (%)** | **95% CI (%)** | **P value** |
| --- | --- | --- | --- | --- |
| Composite | At least one incident | 1.006 | (0.689, 1.322) | <0.001 |
| Adverse childhood experiences | Emotional abuse | 0.016 | (0.001, 0.030) | 0.037 |
|  | Neglect | 0.005 | (-0.004, 0.014) | 0.310 |
|  | Physical abuse | 0.03 | (0.001, 0.059) | 0.043 |
|  | Sexual abuse | 0.028 | (0.002, 0.055) | 0.037 |
| Anxiety disorders | Anxiety disorder | 0.41 | (0.194, 0.626) | <0.001 |
|  | OCD | 0.047 | (-0.008, 0.101) | 0.091 |
|  | Somatoform disorder | -0.009 | (-0.067, 0.048) | 0.749 |
|  | Stress disorder | 0.107 | (-0.028, 0.243) | 0.122 |
| Disruptive behavior disorders | Conduct disorder | -0.028 | (-0.067, 0.011) | 0.158 |
|  | Impulse control disorder | 0.021 | (-0.030, 0.073) | 0.419 |
|  | Oppositional defiant disorder | 0.033 | (-0.016, 0.082) | 0.183 |
| Eating and feeding disorders | Avoidant restrictive food intake | 0.052 | (-0.028, 0.131) | 0.206 |
|  | Other eating and feeding disorder | 0.005 | (-0.013, 0.023) | 0.606 |
| Elimination disorders | Encopresis | 0.008 | (-0.006, 0.022) | 0.269 |
|  | Enuresis | 0.006 | (-0.030, 0.043) | 0.738 |
| Gender dysphoria sexual dysfunction | Gender dysphoria | -0.005 | (-0.057, 0.047) | 0.845 |
|  | Paraphilia | -0.004 | (-0.010, 0.003) | 0.286 |
|  | Sexual dysfunction | -0.001 | (-0.013, 0.011) | 0.871 |
| Intentional self-harm/suicidality | Parasuicidality | 0.031 | (-0.012, 0.073) | 0.161 |
|  | Suicidality | 0.148 | (0.069, 0.226) | <0.001 |
| Mood disorders | Bipolar disorder | -0.003 | (-0.035, 0.030) | 0.875 |
|  | Major depression | 0.008 | (-0.150, 0.167) | 0.920 |
|  | Minor depression | 0.22 | (0.061, 0.379) | 0.007 |
| Neurocognitive disorders | Catatonia | -0.004 | (-0.014, 0.005) | 0.377 |
|  | Delirium | 0.052 | (0.002, 0.102) | 0.042 |
|  | Encephalopathy | 0.013 | (-0.006, 0.033) | 0.167 |
| Neurodevelopmental disorders | Academic developmental disorder | 0.049 | (-0.007, 0.104) | 0.084 |
|  | ADHD | 0.371 | (0.194, 0.549) | <0.001 |
|  | Autism spectrum disorder | 0.091 | (-0.001, 0.183) | 0.052 |
|  | Communication motor disorder | 0.039 | (-0.021, 0.099) | 0.203 |
|  | Intellectual disability | 0.058 | (-0.013, 0.130) | 0.108 |
| Personality disorders | Personality disorder | -0.025 | (-0.054, 0.005) | 0.109 |
| Psychotic disorders | Psychotic disorder | 0 | (-0.029, 0.030) | 0.982 |
|  | Schizoaffective disorder | -0.004 | (-0.017, 0.008) | 0.497 |
|  | Schizophrenia | -0.003 | (-0.021, 0.016) | 0.766 |
| Sleep wake disorders | Hypersomnia | 0.008 | (-0.024, 0.040) | 0.624 |
|  | Insomnia | 0.102 | (0.027, 0.176) | 0.008 |
|  | Parasomnias | 0.028 | (-0.003, 0.059) | 0.077 |
| Standalone symptoms | Anger aggression | 0.027 | (-0.017, 0.071) | 0.229 |
|  | Anxiety symptoms | 0.061 | (0.016, 0.105) | 0.008 |
|  | Attention symptoms | 0.061 | (0.010, 0.113) | 0.020 |
|  | Depressive symptoms | 0.013 | (-0.004, 0.030) | 0.138 |
|  | Hallucinations | 0.011 | (-0.014, 0.036) | 0.368 |
| Substance use and dependence | Alcohol | -0.002 | (-0.028, 0.023) | 0.851 |
|  | Opioid related | 0.002 | (-0.012, 0.015) | 0.814 |
|  | Other substances | -0.005 | (-0.037, 0.027) | 0.762 |
|  | THC | 0.003 | (-0.036, 0.042) | 0.887 |
|  | Tobacco | 0.027 | (-0.027, 0.081) | 0.324 |
| Tic disorders | Tic disorder | 0.035 | (-0.011, 0.080) | 0.132 |

**Supp Table 29.** Estimated risk difference in mental health conditions between the COVID-19 positive cohort and COVID-19 negative cohort for hospitalized youths

| **Category** | **Cluster** | **Risk difference (%)** | **95% CI (%)** | **P value** |
| --- | --- | --- | --- | --- |
| Composite | At least one incident | 3.535 | (1.862, 5.207) | <0.001 |
| Adverse childhood experiences | Emotional abuse | 0.003 | (-0.078, 0.083) | 0.949 |
|  | Neglect | 0.055 | (-0.063, 0.172) | 0.361 |
|  | Physical abuse | 0.035 | (-0.252, 0.323) | 0.811 |
|  | Sexual abuse | 0.069 | (-0.117, 0.255) | 0.465 |
| Anxiety disorders | Anxiety disorder | 1.153 | (-0.054, 2.360) | 0.061 |
|  | OCD | 0.134 | (-0.192, 0.460) | 0.421 |
|  | Somatoform disorder | 0.499 | (0.085, 0.912) | 0.018 |
|  | Stress disorder | 0.61 | (-0.215, 1.435) | 0.147 |
| Disruptive behavior disorders | Conduct disorder | -0.015 | (-0.336, 0.306) | 0.926 |
|  | Impulse control disorder | 0.186 | (-0.261, 0.633) | 0.414 |
|  | Oppositional defiant disorder | 0.098 | (-0.248, 0.444) | 0.580 |
| Eating and feeding disorders | Avoidant restrictive food intake | -0.162 | (-0.755, 0.431) | 0.592 |
|  | Other eating and feeding disorder | 0.134 | (-0.036, 0.304) | 0.123 |
| Elimination disorders | Encopresis | 0.03 | (-0.072, 0.132) | 0.569 |
|  | Enuresis | 0.205 | (-0.020, 0.430) | 0.074 |
| Gender dysphoria sexual dysfunction | Gender dysphoria | -0.213 | (-0.532, 0.105) | 0.189 |
|  | Paraphilia | -0.013 | (-0.054, 0.029) | 0.550 |
|  | Sexual dysfunction | -0.013 | (-0.071, 0.046) | 0.672 |
| Intentional self-harm/suicidality | Parasuicidality | 0.058 | (-0.311, 0.427) | 0.760 |
|  | Suicidality | 0.221 | (-0.450, 0.893) | 0.518 |
| Mood disorders | Bipolar disorder | 0.022 | (-0.198, 0.242) | 0.846 |
|  | Major depression | 0.197 | (-0.748, 1.142) | 0.684 |
|  | Minor depression | 0.67 | (-0.256, 1.596) | 0.156 |
| Neurocognitive disorders | Catatonia | 0.149 | (0.007, 0.292) | 0.040 |
|  | Delirium | 0.759 | (0.304, 1.214) | 0.001 |
|  | Encephalopathy | 0.242 | (0.037, 0.446) | 0.021 |
| Neurodevelopmental disorders | Academic developmental disorder | 0.084 | (-0.246, 0.414) | 0.617 |
|  | ADHD | 0.967 | (0.097, 1.836) | 0.029 |
|  | Autism spectrum disorder | 0.254 | (-0.410, 0.918) | 0.454 |
|  | Communication motor disorder | 0.485 | (-0.002, 0.972) | 0.051 |
|  | Intellectual disability | 0.723 | (-0.036, 1.482) | 0.062 |
| Personality disorders | Personality disorder | 0.174 | (-0.103, 0.451) | 0.218 |
| Psychotic disorders | Psychotic disorder | 0.063 | (-0.241, 0.367) | 0.684 |
|  | Schizoaffective disorder | 0.058 | (-0.061, 0.176) | 0.342 |
|  | Schizophrenia | 0.005 | (-0.197, 0.207) | 0.963 |
| Sleep wake disorders | Hypersomnia | 0.048 | (-0.160, 0.257) | 0.648 |
|  | Insomnia | 0.765 | (0.245, 1.285) | 0.004 |
|  | Parasomnias | 0.031 | (-0.181, 0.243) | 0.776 |
| Standalone symptoms | Anger aggression | 0.195 | (-0.189, 0.579) | 0.319 |
|  | Anxiety symptoms | 0.315 | (-0.065, 0.696) | 0.104 |
|  | Attention symptoms | 0.251 | (-0.029, 0.530) | 0.079 |
|  | Depressive symptoms | 0.029 | (-0.077, 0.135) | 0.595 |
|  | Hallucinations | 0.027 | (-0.227, 0.281) | 0.835 |
| Substance use and dependence | Alcohol | 0.087 | (-0.080, 0.254) | 0.306 |
|  | Opioid related | 0.077 | (-0.106, 0.261) | 0.409 |
|  | Other substances | 0.055 | (-0.203, 0.313) | 0.676 |
|  | THC | -0.08 | (-0.393, 0.233) | 0.615 |
|  | Tobacco | 0.006 | (-0.349, 0.360) | 0.975 |
| Tic disorders | Tic disorder | 0.185 | (-0.063, 0.434) | 0.144 |

**Supp Table 30.** Estimated risk difference in mental health conditions between the COVID-19 positive cohort and COVID-19 negative cohort for youths admitted to ICU

| **Category** | **Cluster** | **Risk difference (%)** | **95% CI (%)** | **P value** |
| --- | --- | --- | --- | --- |
| Composite | At least one incident | 3.418 | (-0.139, 6.974) | 0.060 |
| Adverse childhood experiences | Emotional abuse | 0 | (-0.104, 0.104) | 1.000 |
|  | Neglect | -0.13 | (-0.362, 0.102) | 0.273 |
|  | Physical abuse | -0.155 | (-0.536, 0.227) | 0.427 |
|  | Sexual abuse | -0.084 | (-0.339, 0.170) | 0.516 |
| Anxiety disorders | Anxiety disorder | 0.985 | (-1.284, 3.254) | 0.395 |
|  | OCD | 0.309 | (-0.199, 0.817) | 0.233 |
|  | Somatoform disorder | -0.102 | (-0.852, 0.648) | 0.790 |
|  | Stress disorder | -0.865 | (-2.382, 0.652) | 0.264 |
| Disruptive behavior disorders | Conduct disorder | 0.288 | (-0.256, 0.832) | 0.300 |
|  | Impulse control disorder | 0 | (-0.631, 0.631) | 1.000 |
|  | Oppositional defiant disorder | -0.151 | (-0.742, 0.440) | 0.616 |
| Eating and feeding disorders | Avoidant restrictive food intake | 0.407 | (-0.499, 1.314) | 0.379 |
|  | Other eating and feeding disorder | 0.197 | (-0.088, 0.481) | 0.176 |
| Elimination disorders | Encopresis | -0.042 | (-0.189, 0.105) | 0.574 |
|  | Enuresis | 0.221 | (-0.207, 0.649) | 0.311 |
| Gender dysphoria sexual dysfunction | Gender dysphoria | 0.165 | (-0.408, 0.738) | 0.573 |
|  | Paraphilia | NA | NA | NA |
|  | Sexual dysfunction | -0.042 | (-0.146, 0.062) | 0.427 |
| Intentional self-harm/suicidality | Parasuicidality | 0.559 | (-0.055, 1.172) | 0.074 |
|  | Suicidality | -0.067 | (-1.105, 0.972) | 0.900 |
| Mood disorders | Bipolar disorder | 0.046 | (-0.314, 0.405) | 0.804 |
|  | Major depression | -0.285 | (-2.016, 1.446) | 0.747 |
|  | Minor depression | 1.214 | (-0.319, 2.747) | 0.121 |
| Neurocognitive disorders | Catatonia | 0.112 | (-0.172, 0.397) | 0.439 |
|  | Delirium | 1.38 | (0.177, 2.583) | 0.025 |
|  | Encephalopathy | 0.277 | (-0.300, 0.855) | 0.347 |
| Neurodevelopmental disorders | Academic developmental disorder | -0.327 | (-0.986, 0.333) | 0.332 |
|  | ADHD | 1.138 | (-0.429, 2.704) | 0.155 |
|  | Autism spectrum disorder | 0.109 | (-1.266, 1.483) | 0.877 |
|  | Communication motor disorder | 0.404 | (-0.667, 1.475) | 0.460 |
|  | Intellectual disability | -0.829 | (-2.754, 1.097) | 0.399 |
| Personality disorders | Personality disorder | 0.017 | (-0.501, 0.536) | 0.948 |
| Psychotic disorders | Psychotic disorder | -0.197 | (-0.655, 0.262) | 0.400 |
|  | Schizoaffective disorder | 0.112 | (-0.015, 0.240) | 0.084 |
|  | Schizophrenia | -0.042 | (-0.275, 0.190) | 0.722 |
| Sleep wake disorders | Hypersomnia | 0 | (-0.415, 0.415) | 1.000 |
|  | Insomnia | 0.323 | (-0.748, 1.394) | 0.555 |
|  | Parasomnias | -0.049 | (-0.477, 0.379) | 0.822 |
| Standalone symptoms | Anger aggression | -0.06 | (-0.584, 0.464) | 0.823 |
|  | Anxiety symptoms | 0.548 | (-0.283, 1.378) | 0.196 |
|  | Attention symptoms | 0.126 | (-0.588, 0.840) | 0.729 |
|  | Depressive symptoms | 0.088 | (-0.016, 0.192) | 0.098 |
|  | Hallucinations | -0.2 | (-0.622, 0.222) | 0.352 |
| Substance use and dependence | Alcohol | 0.116 | (-0.266, 0.497) | 0.552 |
|  | Opioid related | -0.162 | (-0.637, 0.314) | 0.505 |
|  | Other substances | 0.277 | (-0.318, 0.873) | 0.362 |
|  | THC | -0.004 | (-0.576, 0.569) | 0.990 |
|  | Tobacco | -0.46 | (-1.235, 0.314) | 0.244 |
| Tic disorders | Tic disorder | 0.067 | (-0.315, 0.448) | 0.732 |

# Section 12 Supplemental Results: sensitivity analysis for subgroups with different levels of COVID-19 severity

We conducted sensitivity analyses on both cohorts stratified by the COVID-19 severity (i.e., asymptomatic, mild, moderate, and severe). We performed the same PS matching procedure and difference-in-difference method to estimate the risk difference.

## A. Empirical equipoise assessment

**Supp Figure 71.** Preference score distributions of COVID-19 positive and negative groups for children in asymptomatic group. A greater convergence of these distributions indicates a higher similarity in the predicted likelihood of being infected between the COVID-19 positive (red) and negative (blue) participants.


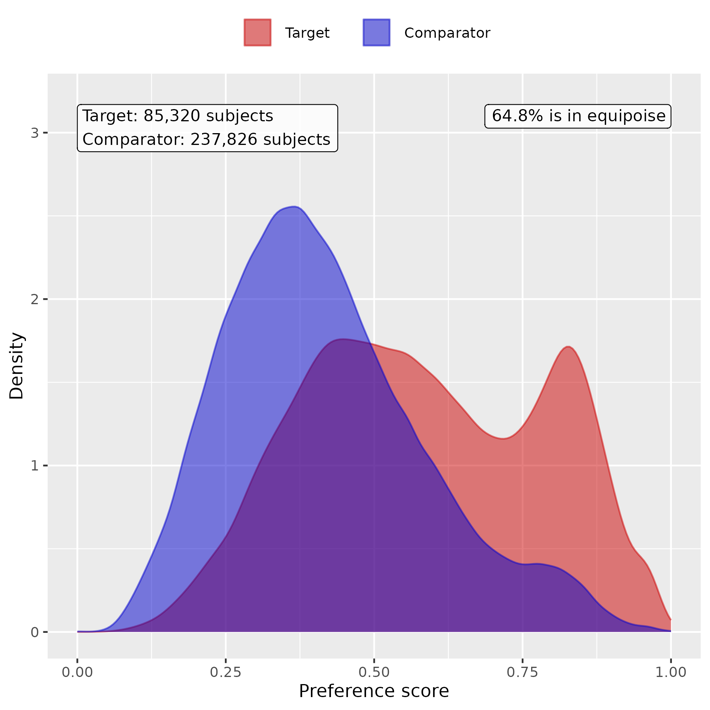


**Supp Figure 72.** Preference score distributions of COVID-19 positive and negative groups for children in mild group. A greater convergence of these distributions indicates a higher similarity in the predicted likelihood of being infected between the COVID-19 positive (red) and negative (blue) participants.


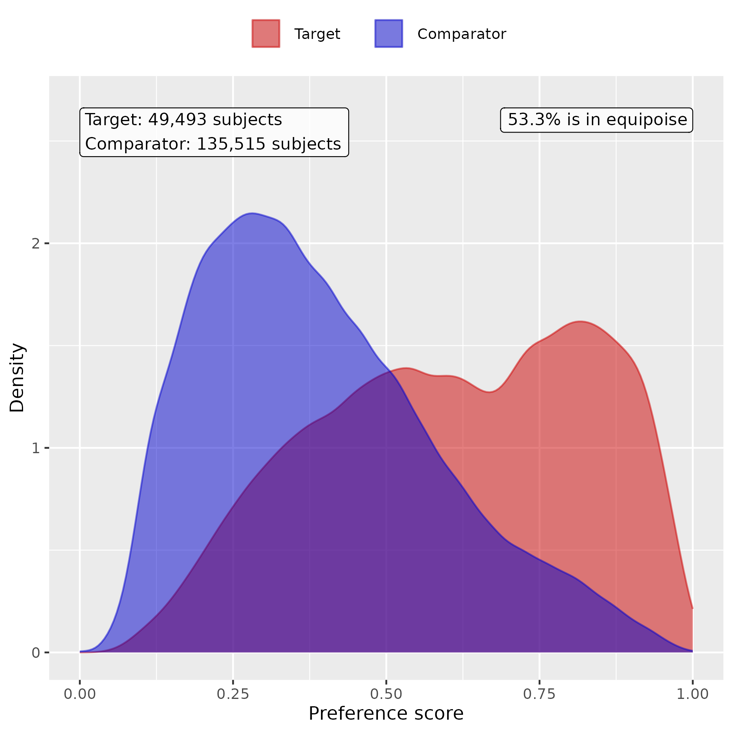


**Supp Figure 73.** Preference score distributions of COVID-19 positive and negative groups for children in moderate group. A greater convergence of these distributions indicates a higher similarity in the predicted likelihood of being infected between the COVID-19 positive (red) and negative (blue) participants.


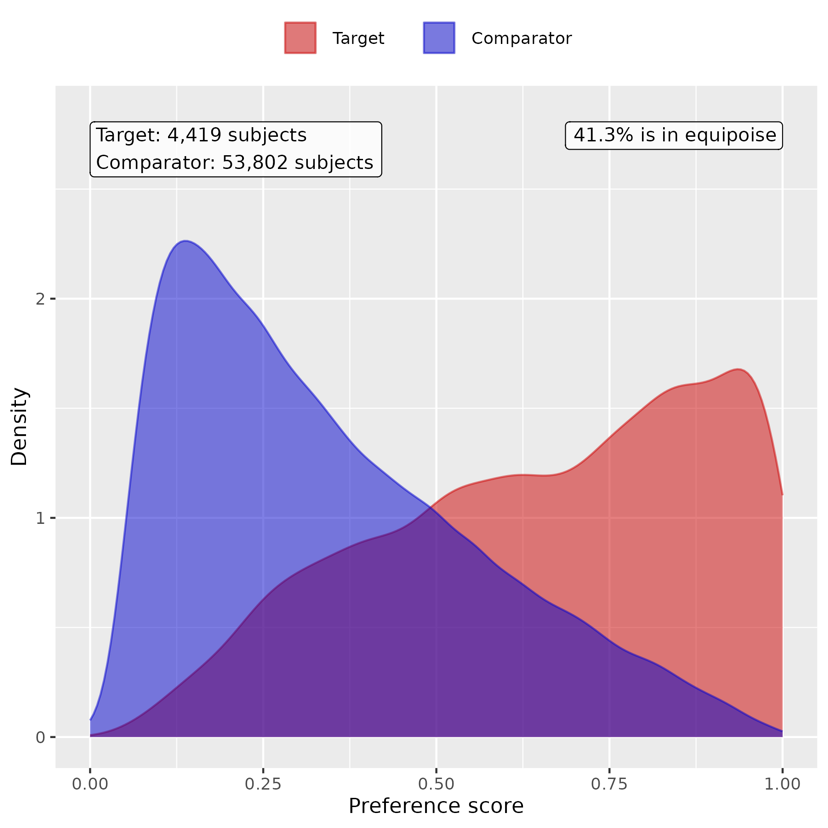


**Supp Figure 74.** Preference score distributions of COVID-19 positive and negative groups for children in severe group. A greater convergence of these distributions indicates a higher similarity in the predicted likelihood of being infected between the COVID-19 positive (red) and negative (blue) participants.


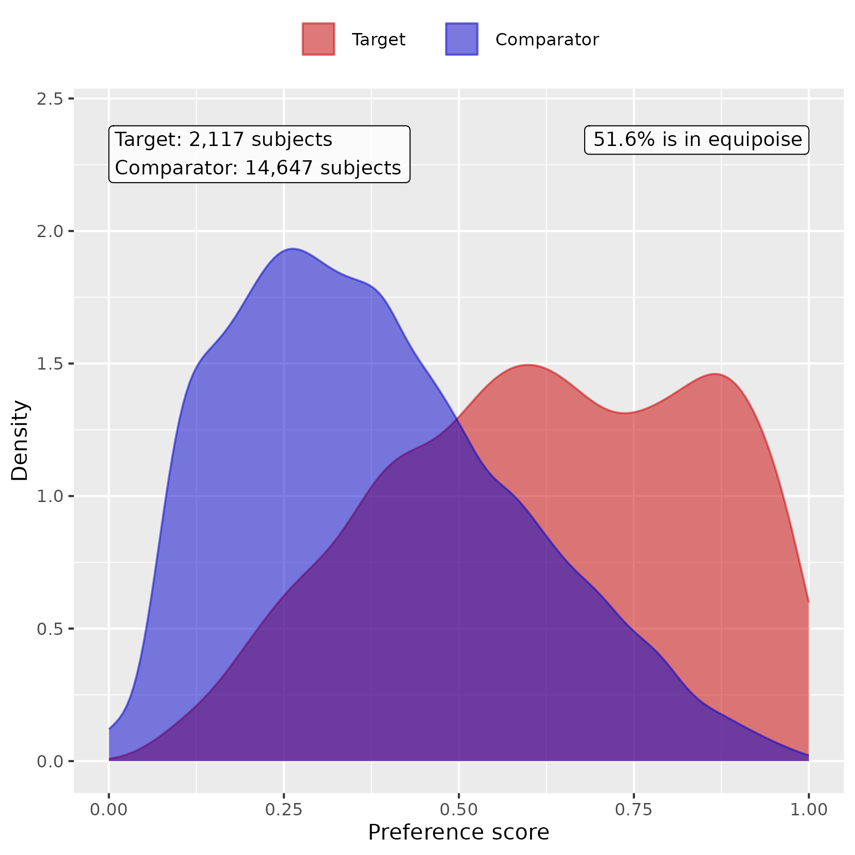


**Supp Figure 75.** Preference score distributions of COVID-19 positive and COVID-19 negative groups for youths in asymptomatic group. A greater convergence of these distributions indicates a higher similarity in the predicted likelihood of being infected between the COVID-19 positive (red) and negative (blue) participants.


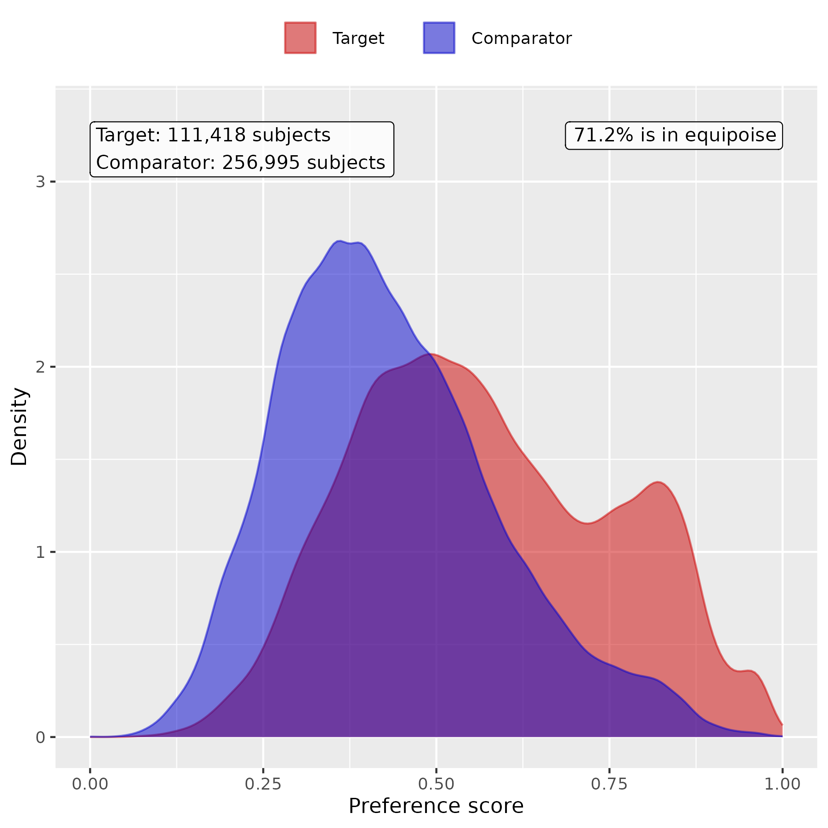


**Supp Figure 76.** Preference score distributions of COVID-19 positive and negative groups for youths in mild group. A greater convergence of these distributions indicates a higher similarity in the predicted likelihood of being infected between the COVID-19 positive (red) and negative (blue) participants.


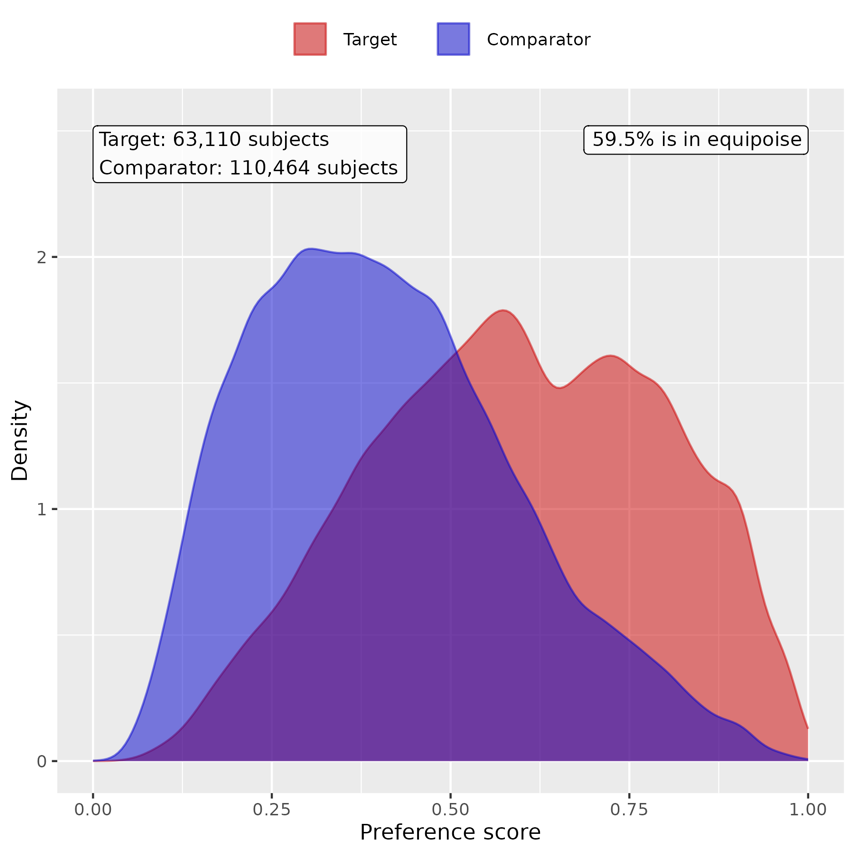


**Supp Figure 77.** Preference score distributions of COVID-19 positive and negative groups for youths in moderate group. A greater convergence of these distributions indicates a higher similarity in the predicted likelihood of being infected between the COVID-19 positive (red) and negative (blue) participants.


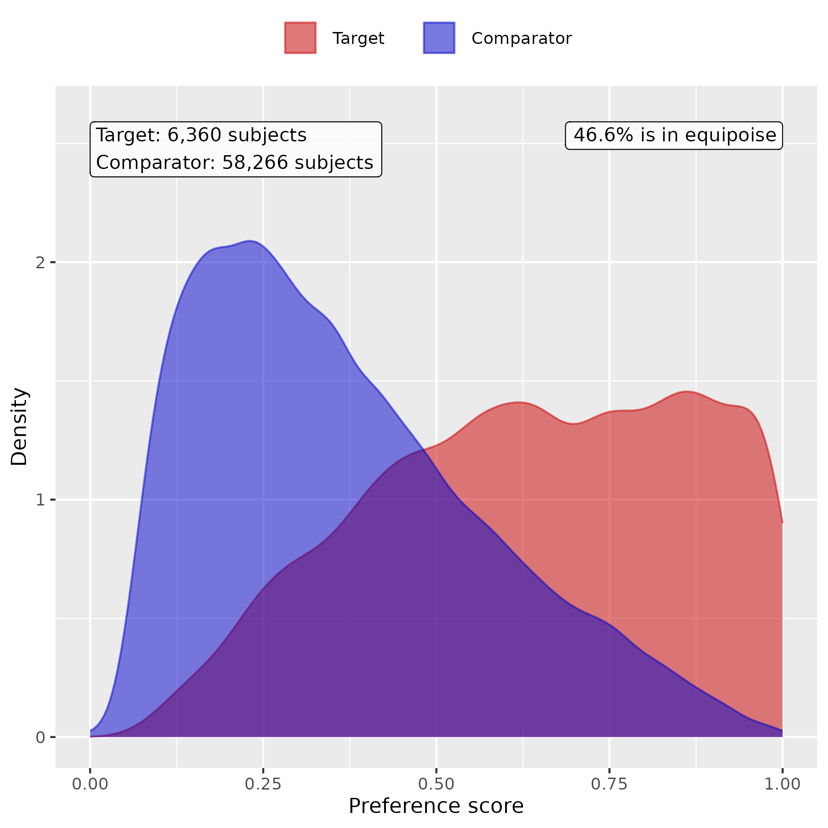


**Supp Figure 78.** Preference score distributions of COVID-19 positive and negative groups for youths in severe group. A greater convergence of these distributions indicates a higher similarity in the predicted likelihood of being infected between the COVID-19 positive (red) and negative (blue) participants.


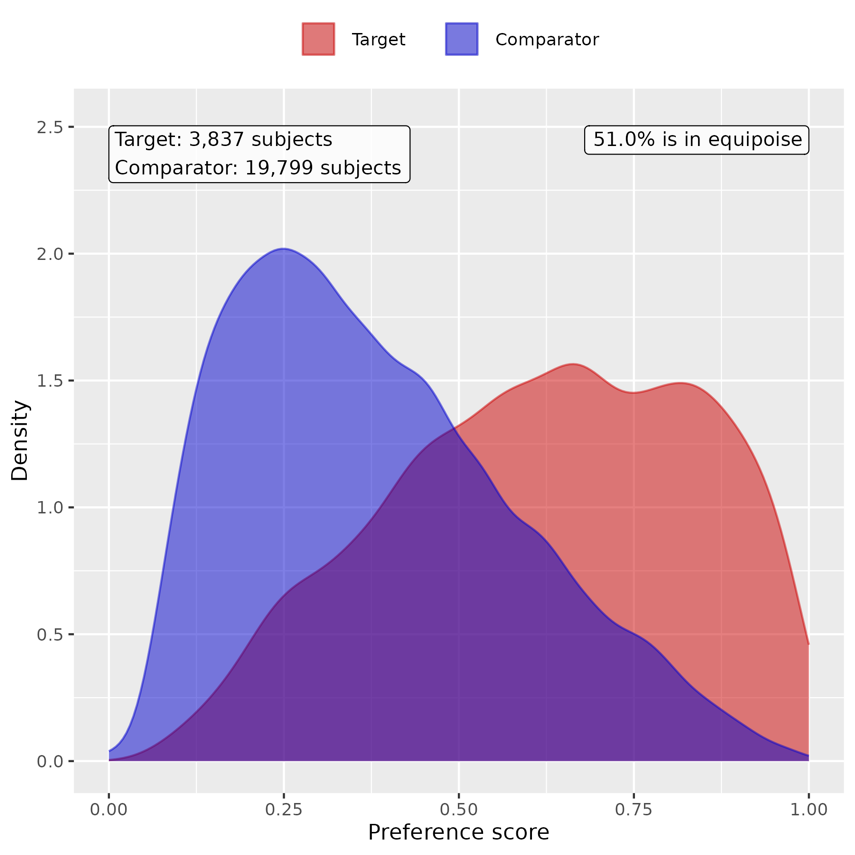


## B. Patient characteristic balance

**Supp Figure 79.** Patient characteristic balance before and after large-scale PS matching with ratio 1:2 for children in asymptomatic group. The upper panel displays the top 20 covariates with the largest standardized difference of means before matching, while the lower panel displays the top 20 covariates with the largest standardized difference of means after matching.


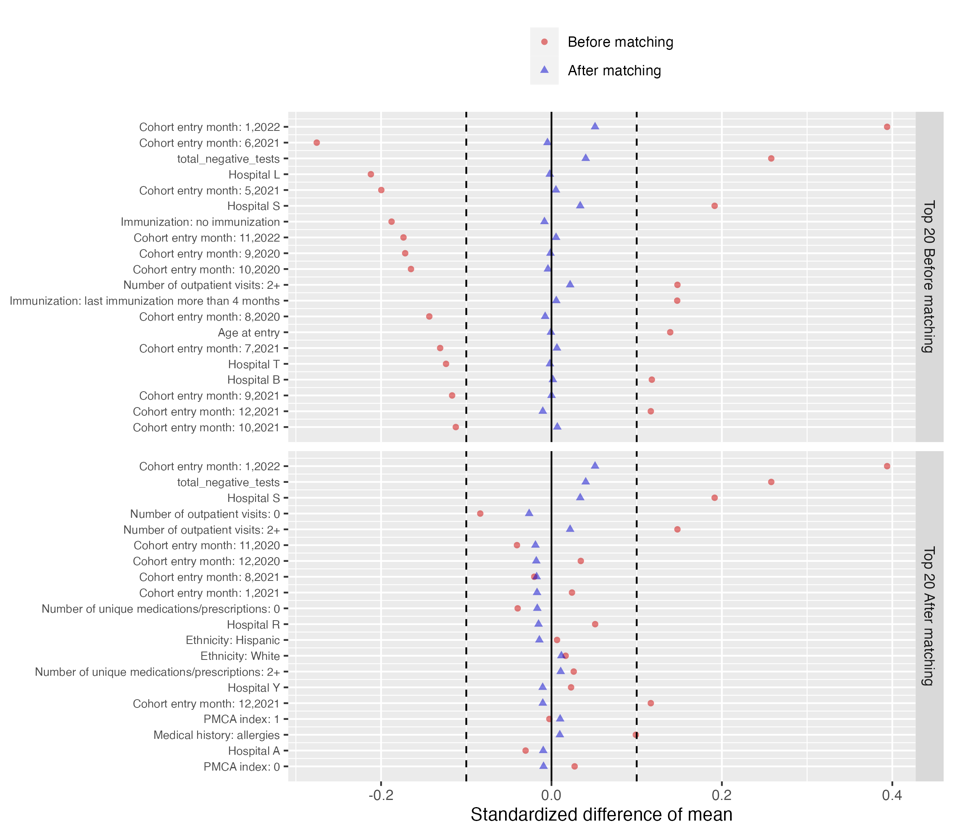


**Supp Figure 80.** Patient characteristic balance before and after large-scale PS matching with ratio 1:2 for children in mild group. The upper panel displays the top 20 covariates with the largest standardized difference of means before matching, while the lower panel displays the top 20 covariates with the largest standardized difference of means after matching.


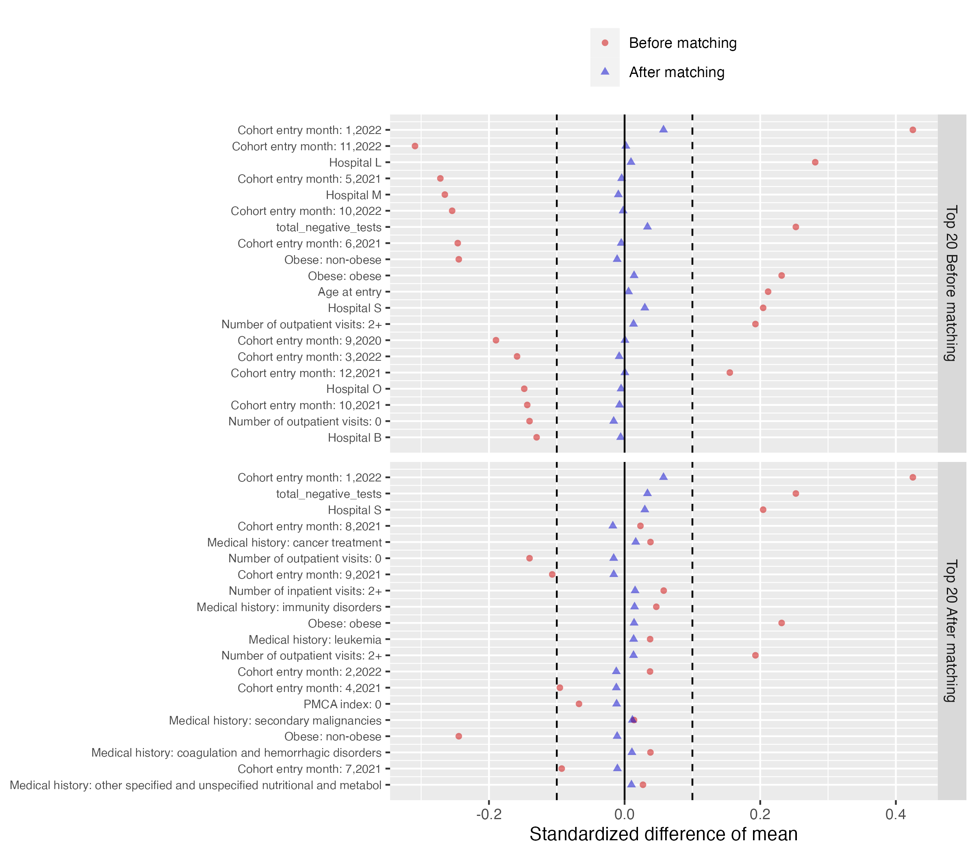


**Supp Figure 81.** Patient characteristic balance before and after large-scale PS matching with ratio 1:2 for children in moderate group. The upper panel displays the top 20 covariates with the largest standardized difference of means before matching, while the lower panel displays the top 20 covariates with the largest standardized difference of means after matching.


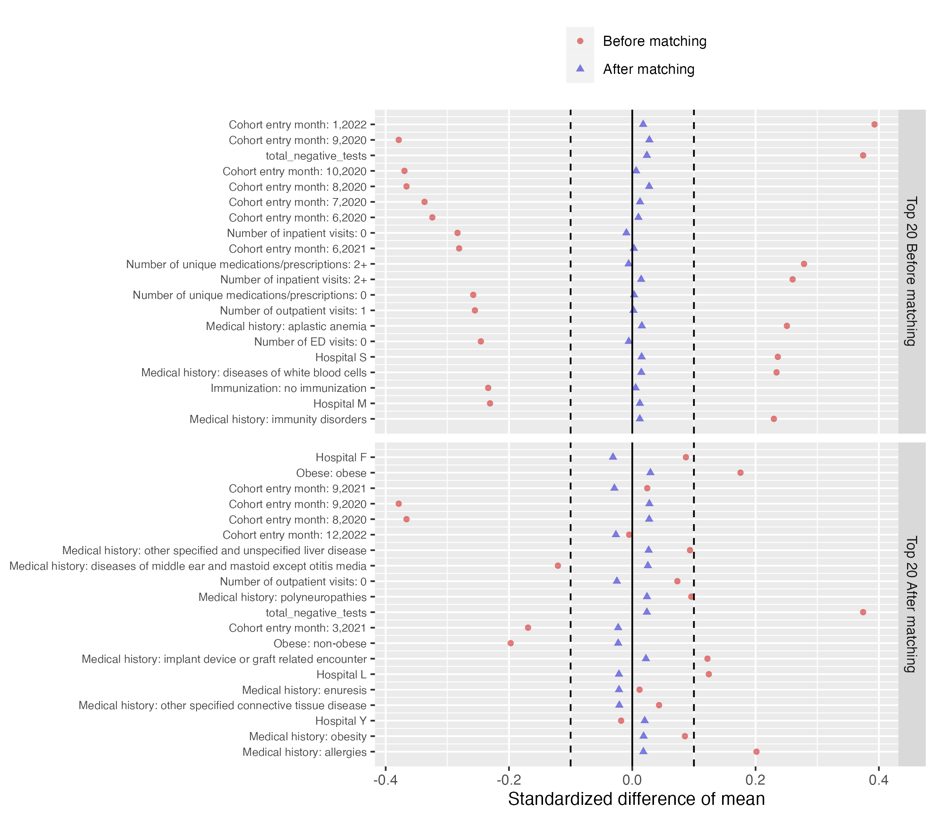


**Supp Figure 82.** Patient characteristic balance before and after large-scale PS matching with ratio 1:2 for children in severe group. The upper panel displays the top 20 covariates with the largest standardized difference of means before matching, while the lower panel displays the top 20 covariates with the largest standardized difference of means after matching.


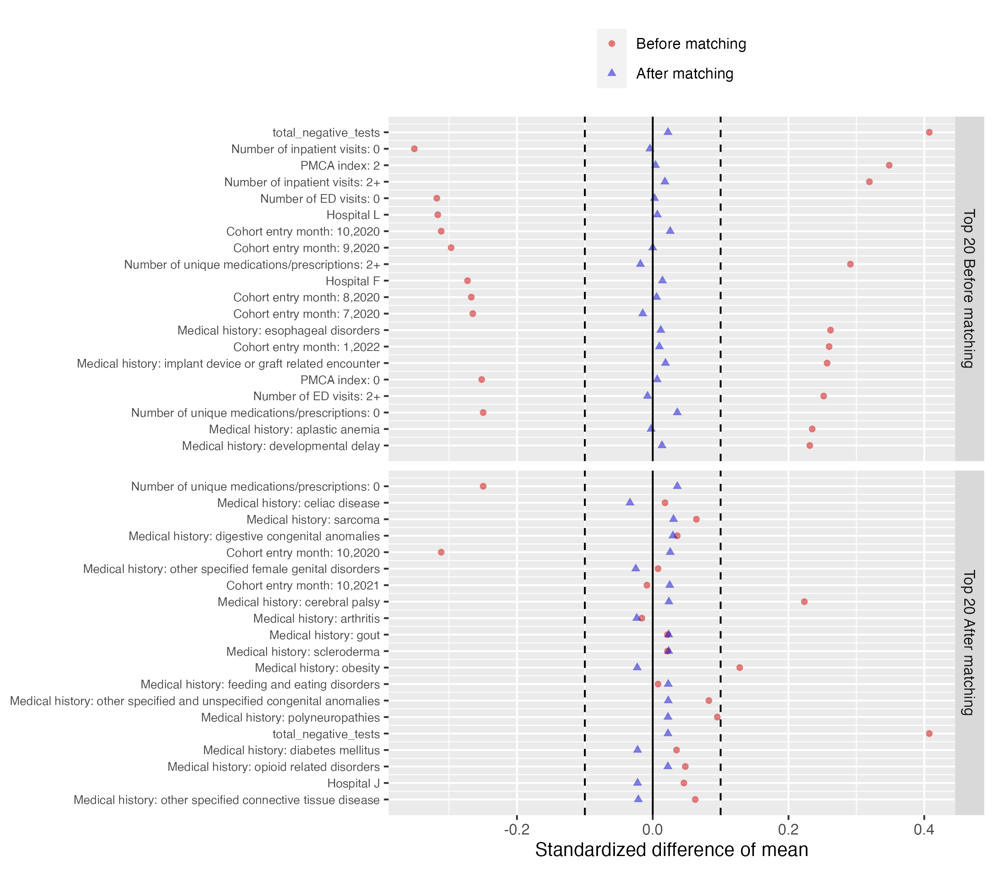


**Supp Figure 83.** Patient characteristic balance before and after large-scale PS matching with ratio 1:2 for youths in asymptomatic group. The upper panel displays the top 20 covariates with the largest standardized difference of means before matching, while the lower panel displays the top 20 covariates with the largest standardized difference of means after matching.


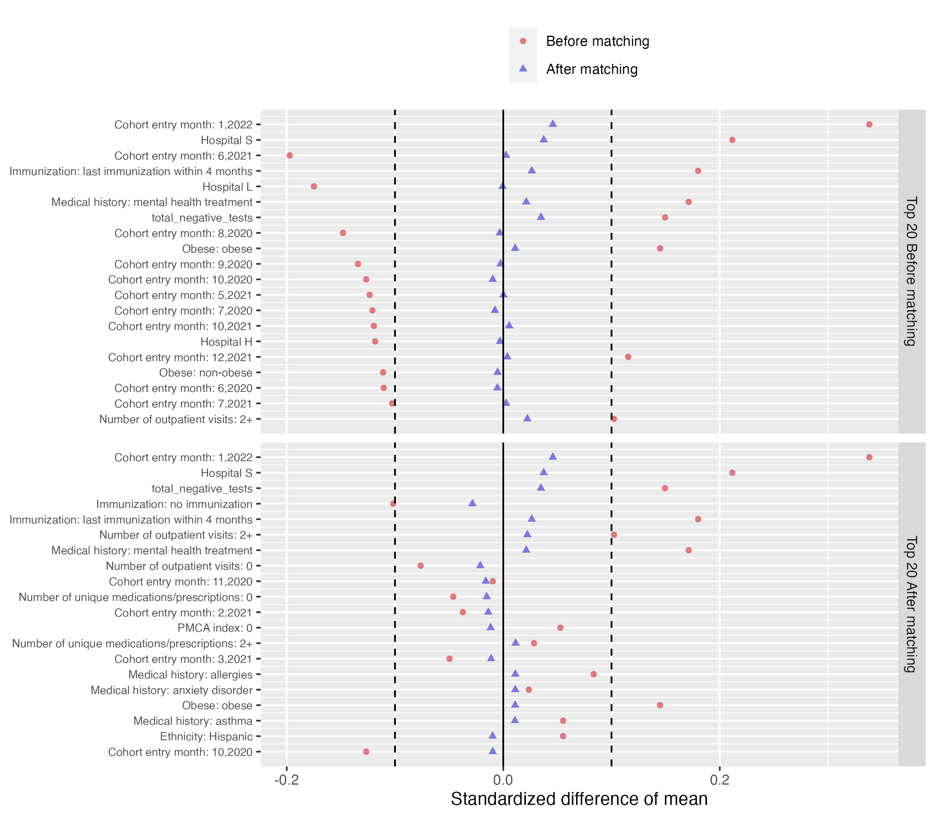


**Supp Figure 84.** Patient characteristic balance before and after large-scale PS matching with ratio 1:2 for youths in mild group. The upper panel displays the top 20 covariates with the largest standardized difference of means before matching, while the lower panel displays the top 20 covariates with the largest standardized difference of means after matching.


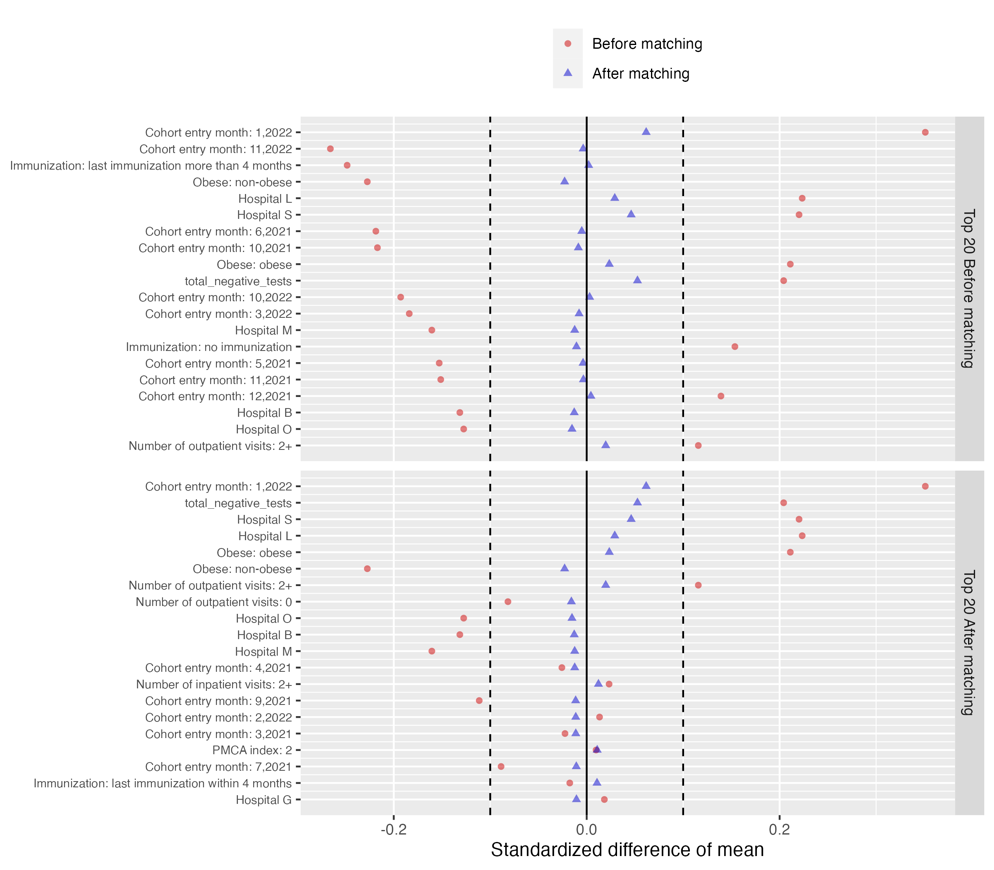


**Supp Figure 85.** Patient characteristic balance before and after large-scale PS matching with ratio 1:2 for youths in moderate group. The upper panel displays the top 20 covariates with the largest standardized difference of means before matching, while the lower panel displays the top 20 covariates with the largest standardized difference of means after matching.


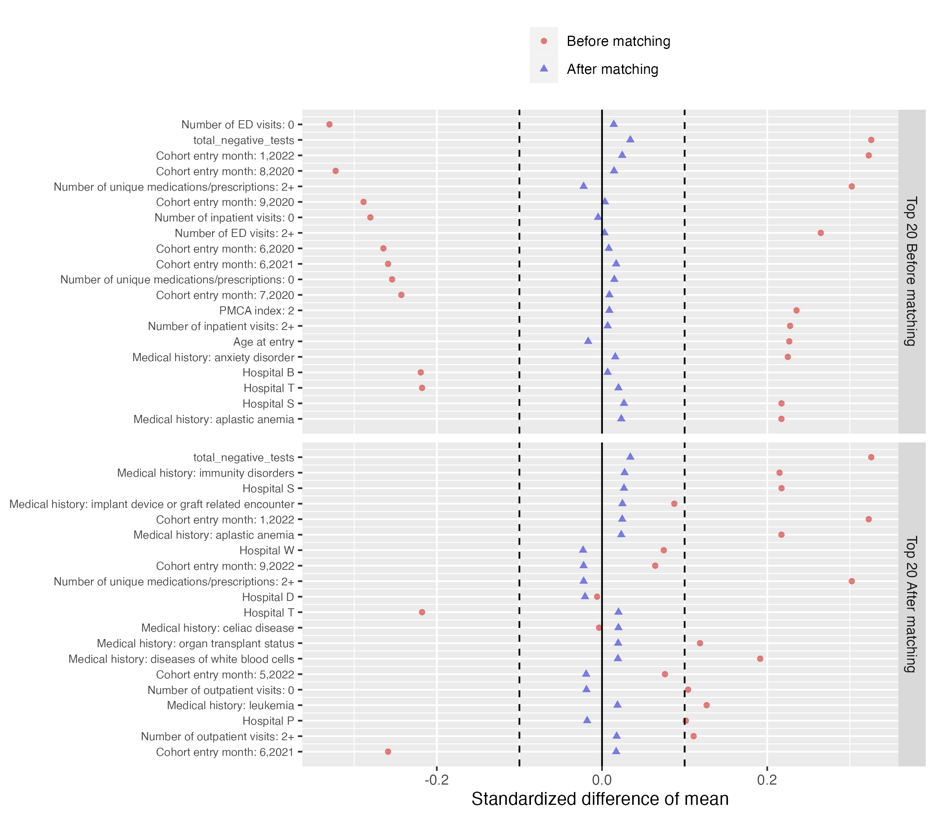


**Supp Figure 86.** Patient characteristic balance before and after large-scale PS matching with ratio 1:2 for youths in severe group. The upper panel displays the top 20 covariates with the largest standardized difference of means before matching, while the lower panel displays the top 20 covariates with the largest standardized difference of means after matching.


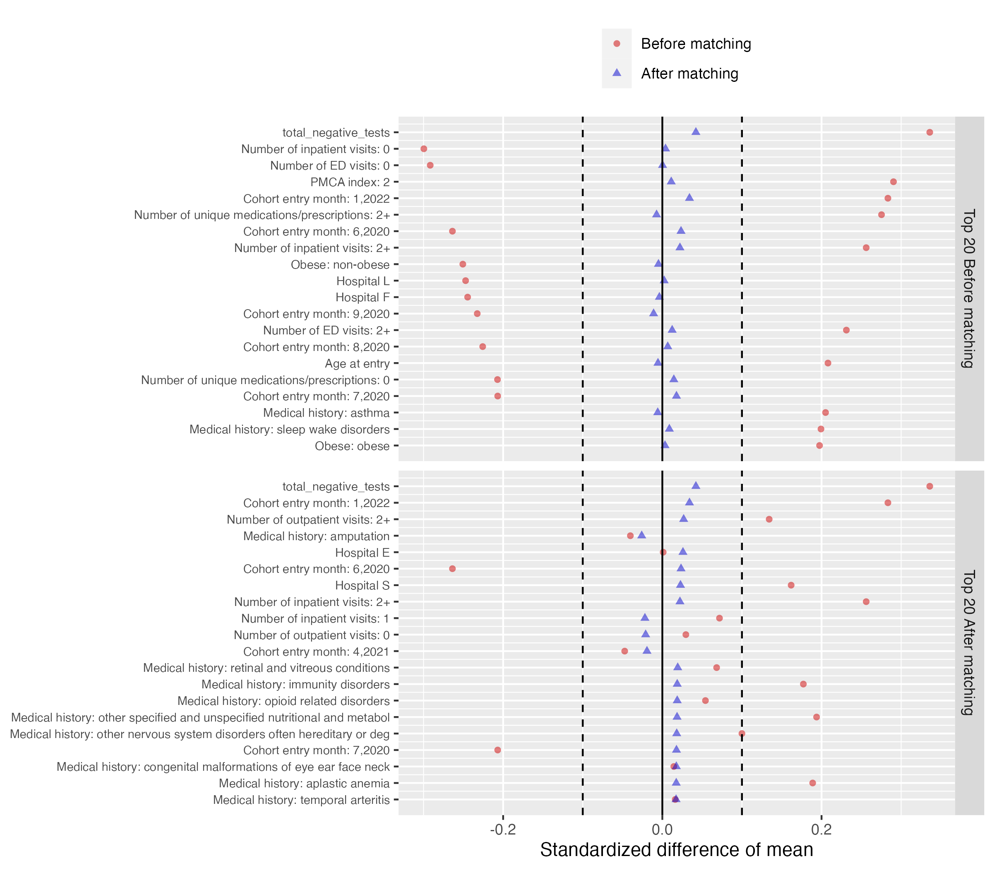


## C. Risk difference of COVID-19 positive group compared to COVID-19 negative group

**Supp Table 31.** Estimated risk difference in mental health conditions between the COVID-19 positive cohort and COVID-19 negative cohort for children in asymptomatic group

| **Category** | **Cluster** | **Risk difference (%)** | **95% CI (%)** | **P value** |
| --- | --- | --- | --- | --- |
| Composite | At least one incident | 1.029 | (0.624, 1.433) | <0.001 |
| Adverse childhood experiences | Emotional abuse | -0.002 | (-0.024, 0.020) | 0.893 |
|  | Neglect | 0.012 | (-0.002, 0.025) | 0.088 |
|  | Physical abuse | 0.002 | (-0.038, 0.042) | 0.929 |
|  | Sexual abuse | 0.007 | (-0.025, 0.039) | 0.650 |
| Anxiety disorders | Anxiety disorder | 0.436 | (0.257, 0.615) | <0.001 |
|  | OCD | 0.038 | (-0.009, 0.085) | 0.109 |
|  | Somatoform disorder | 0.035 | (-0.021, 0.092) | 0.220 |
|  | Stress disorder | 0.11 | (-0.039, 0.259) | 0.148 |
| Disruptive behavior disorders | Conduct disorder | -0.042 | (-0.127, 0.043) | 0.329 |
|  | Impulse control disorder | -0.095 | (-0.177, -0.013) | 0.023 |
|  | Oppositional defiant disorder | 0.036 | (-0.036, 0.108) | 0.332 |
| Eating and feeding disorders | Avoidant restrictive food intake | 0.06 | (-0.001, 0.121) | 0.054 |
|  | Other eating and feeding disorder | -0.006 | (-0.040, 0.027) | 0.716 |
| Elimination disorders | Encopresis | 0.016 | (-0.038, 0.070) | 0.562 |
|  | Enuresis | -0.018 | (-0.117, 0.080) | 0.716 |
| Gender dysphoria sexual dysfunction | Gender dysphoria | -0.008 | (-0.034, 0.017) | 0.510 |
|  | Paraphilia | NA | NA | NA |
|  | Sexual dysfunction | -0.001 | (-0.006, 0.003) | 0.560 |
| Intentional self-harm/suicidality | Parasuicidality | -0.016 | (-0.053, 0.020) | 0.378 |
|  | Suicidality | 0.007 | (-0.044, 0.058) | 0.786 |
| Mood disorders | Bipolar disorder | 0.015 | (-0.011, 0.042) | 0.257 |
|  | Major depression | -0.045 | (-0.104, 0.014) | 0.132 |
|  | Minor depression | 0 | (-0.076, 0.075) | 0.998 |
| Neurocognitive disorders | Catatonia | -0.002 | (-0.008, 0.004) | 0.557 |
|  | Delirium | 0.043 | (0.012, 0.074) | 0.006 |
|  | Encephalopathy | 0.016 | (-0.008, 0.040) | 0.185 |
| Neurodevelopmental disorders | Academic developmental disorder | 0.015 | (-0.090, 0.120) | 0.778 |
|  | ADHD | 0.245 | (-0.007, 0.497) | 0.056 |
|  | Autism spectrum disorder | 0.161 | (-0.015, 0.338) | 0.074 |
|  | Communication motor disorder | 0.225 | (0.035, 0.414) | 0.020 |
|  | Intellectual disability | 0.148 | (0.016, 0.280) | 0.028 |
| Personality disorders | Personality disorder | 0.008 | (-0.010, 0.026) | 0.366 |
| Psychotic disorders | Psychotic disorder | -0.002 | (-0.021, 0.017) | 0.845 |
|  | Schizoaffective disorder | 0.001 | (-0.003, 0.006) | 0.560 |
|  | Schizophrenia | -0.001 | (-0.007, 0.006) | 0.865 |
| Sleep wake disorders | Hypersomnia | -0.004 | (-0.032, 0.025) | 0.804 |
|  | Insomnia | 0.038 | (-0.043, 0.120) | 0.358 |
|  | Parasomnias | 0.014 | (-0.043, 0.071) | 0.627 |
| Standalone symptoms | Anger aggression | 0.047 | (-0.022, 0.116) | 0.184 |
|  | Anxiety symptoms | 0.073 | (0.015, 0.130) | 0.013 |
|  | Attention symptoms | -0.015 | (-0.101, 0.071) | 0.736 |
|  | Depressive symptoms | 0.01 | (-0.007, 0.027) | 0.250 |
|  | Hallucinations | 0.007 | (-0.018, 0.033) | 0.562 |
| Substance use and dependence | Alcohol | -0.001 | (-0.007, 0.005) | 0.753 |
|  | Opioid related | 0.005 | (-0.003, 0.013) | 0.193 |
|  | Other substances | -0.002 | (-0.015, 0.011) | 0.770 |
|  | THC | NA | NA | NA |
|  | Tobacco | -0.002 | (-0.007, 0.004) | 0.588 |
| Tic disorders | Tic disorder | 0.053 | (-0.019, 0.124) | 0.151 |

**Supp Table 32.** Estimated risk difference in mental health conditions between the COVID-19 positive cohort and COVID-19 negative cohort for children in mild group

| **Category** | **Cluster** | **Risk difference (%)** | **95% CI (%)** | **P value** |
| --- | --- | --- | --- | --- |
| Composite | At least one incident | 0.086 | (-0.476, 0.648) | 0.764 |
| Adverse childhood experiences | Emotional abuse | -0.019 | (-0.057, 0.020) | 0.337 |
|  | Neglect | -0.006 | (-0.028, 0.017) | 0.622 |
|  | Physical abuse | 0.004 | (-0.049, 0.057) | 0.884 |
|  | Sexual abuse | -0.016 | (-0.059, 0.027) | 0.467 |
| Anxiety disorders | Anxiety disorder | 0.076 | (-0.185, 0.337) | 0.568 |
|  | OCD | 0.029 | (-0.032, 0.090) | 0.352 |
|  | Somatoform disorder | 0.081 | (-0.011, 0.172) | 0.084 |
|  | Stress disorder | 0 | (-0.212, 0.212) | 0.998 |
| Disruptive behavior disorders | Conduct disorder | 0.051 | (-0.059, 0.161) | 0.359 |
|  | Impulse control disorder | 0.074 | (-0.031, 0.178) | 0.167 |
|  | Oppositional defiant disorder | 0.003 | (-0.090, 0.096) | 0.955 |
| Eating and feeding disorders | Avoidant restrictive food intake | -0.084 | (-0.187, 0.020) | 0.112 |
|  | Other eating and feeding disorder | -0.005 | (-0.053, 0.044) | 0.844 |
| Elimination disorders | Encopresis | 0.025 | (-0.037, 0.086) | 0.429 |
|  | Enuresis | 0.058 | (-0.078, 0.195) | 0.402 |
| Gender dysphoria sexual dysfunction | Gender dysphoria | 0.005 | (-0.027, 0.036) | 0.770 |
|  | Paraphilia | -0.001 | (-0.005, 0.002) | 0.433 |
|  | Sexual dysfunction | 0.001 | (-0.006, 0.008) | 0.807 |
| Intentional self-harm/suicidality | Parasuicidality | 0.029 | (-0.015, 0.073) | 0.197 |
|  | Suicidality | 0.038 | (-0.025, 0.101) | 0.237 |
| Mood disorders | Bipolar disorder | 0.016 | (-0.025, 0.057) | 0.434 |
|  | Major depression | 0.004 | (-0.081, 0.089) | 0.928 |
|  | Minor depression | 0.045 | (-0.060, 0.151) | 0.399 |
| Neurocognitive disorders | Catatonia | 0.002 | (-0.006, 0.010) | 0.569 |
|  | Delirium | 0.007 | (-0.037, 0.051) | 0.762 |
|  | Encephalopathy | -0.011 | (-0.035, 0.013) | 0.380 |
| Neurodevelopmental disorders | Academic developmental disorder | -0.023 | (-0.166, 0.119) | 0.751 |
|  | ADHD | -0.101 | (-0.457, 0.254) | 0.577 |
|  | Autism spectrum disorder | 0.074 | (-0.159, 0.308) | 0.533 |
|  | Communication motor disorder | -0.039 | (-0.288, 0.209) | 0.756 |
|  | Intellectual disability | -0.016 | (-0.169, 0.136) | 0.835 |
| Personality disorders | Personality disorder | -0.006 | (-0.032, 0.020) | 0.641 |
| Psychotic disorders | Psychotic disorder | 0.004 | (-0.024, 0.032) | 0.783 |
|  | Schizoaffective disorder | 0.003 | (-0.002, 0.008) | 0.267 |
|  | Schizophrenia | 0.001 | (-0.007, 0.009) | 0.726 |
| Sleep wake disorders | Hypersomnia | -0.004 | (-0.043, 0.034) | 0.825 |
|  | Insomnia | 0.035 | (-0.073, 0.142) | 0.529 |
|  | Parasomnias | 0.033 | (-0.046, 0.113) | 0.412 |
| Standalone symptoms | Anger aggression | 0.058 | (-0.029, 0.146) | 0.189 |
|  | Anxiety symptoms | -0.017 | (-0.114, 0.080) | 0.730 |
|  | Attention symptoms | 0.006 | (-0.112, 0.125) | 0.918 |
|  | Depressive symptoms | 0.004 | (-0.019, 0.027) | 0.733 |
|  | Hallucinations | 0.021 | (-0.013, 0.055) | 0.225 |
| Substance use and dependence | Alcohol | -0.008 | (-0.015, -0.000) | 0.039 |
|  | Opioid related | 0.003 | (-0.006, 0.012) | 0.522 |
|  | Other substances | 0.008 | (-0.013, 0.029) | 0.429 |
|  | THC | NA | NA | NA |
|  | Tobacco | 0.005 | (-0.003, 0.012) | 0.202 |
| Tic disorders | Tic disorder | 0.015 | (-0.081, 0.112) | 0.753 |

**Supp Table 33.** Estimated risk difference in mental health conditions between the COVID-19 positive cohort and COVID-19 negative cohort for children in moderate group

| **Category** | **Cluster** | **Risk difference (%)** | **95% CI (%)** | **P value** |
| --- | --- | --- | --- | --- |
| Composite | At least one incident | 3.523 | (1.450, 5.596) | <0.001 |
| Adverse childhood experiences | Emotional abuse | -0.013 | (-0.048, 0.022) | 0.465 |
|  | Neglect | 0.062 | (-0.016, 0.140) | 0.121 |
|  | Physical abuse | 0.111 | (-0.108, 0.330) | 0.320 |
|  | Sexual abuse | 0.086 | (-0.024, 0.197) | 0.126 |
| Anxiety disorders | Anxiety disorder | 0.807 | (-0.178, 1.792) | 0.108 |
|  | OCD | 0.036 | (-0.146, 0.218) | 0.700 |
|  | Somatoform disorder | -0.129 | (-0.459, 0.201) | 0.443 |
|  | Stress disorder | 0.729 | (0.029, 1.428) | 0.041 |
| Disruptive behavior disorders | Conduct disorder | -0.181 | (-0.649, 0.286) | 0.447 |
|  | Impulse control disorder | 0.157 | (-0.268, 0.582) | 0.469 |
|  | Oppositional defiant disorder | 0.188 | (-0.148, 0.523) | 0.273 |
| Eating and feeding disorders | Avoidant restrictive food intake | 0.638 | (0.138, 1.137) | 0.012 |
|  | Other eating and feeding disorder | -0.077 | (-0.301, 0.148) | 0.502 |
| Elimination disorders | Encopresis | 0.272 | (-0.014, 0.559) | 0.062 |
|  | Enuresis | 0.146 | (-0.315, 0.606) | 0.536 |
| Gender dysphoria sexual dysfunction | Gender dysphoria | 0.052 | (-0.096, 0.201) | 0.490 |
|  | Paraphilia | NA | NA | NA |
|  | Sexual dysfunction | NA | NA | NA |
| Intentional self-harm/suicidality | Parasuicidality | 0.064 | (-0.115, 0.242) | 0.485 |
|  | Suicidality | 0.163 | (-0.025, 0.352) | 0.090 |
| Mood disorders | Bipolar disorder | 0.143 | (-0.055, 0.342) | 0.156 |
|  | Major depression | 0.09 | (-0.168, 0.347) | 0.494 |
|  | Minor depression | 0.06 | (-0.295, 0.415) | 0.742 |
| Neurocognitive disorders | Catatonia | NA | NA | NA |
|  | Delirium | 0.15 | (-0.082, 0.383) | 0.205 |
|  | Encephalopathy | 0.075 | (-0.082, 0.232) | 0.348 |
| Neurodevelopmental disorders | Academic developmental disorder | 0.316 | (-0.204, 0.836) | 0.233 |
|  | ADHD | 0.317 | (-0.815, 1.449) | 0.583 |
|  | Autism spectrum disorder | 0.751 | (-0.308, 1.810) | 0.164 |
|  | Communication motor disorder | 0.514 | (-0.608, 1.636) | 0.370 |
|  | Intellectual disability | 0.321 | (-0.657, 1.299) | 0.520 |
| Personality disorders | Personality disorder | 0 | (-0.086, 0.086) | 1.000 |
| Psychotic disorders | Psychotic disorder | 0.064 | (-0.035, 0.163) | 0.208 |
|  | Schizoaffective disorder | NA | NA | NA |
|  | Schizophrenia | -0.011 | (-0.061, 0.038) | 0.653 |
| Sleep wake disorders | Hypersomnia | 0.036 | (-0.139, 0.211) | 0.689 |
|  | Insomnia | -0.086 | (-0.578, 0.405) | 0.730 |
|  | Parasomnias | 0.311 | (-0.073, 0.694) | 0.112 |
| Standalone symptoms | Anger aggression | -0.093 | (-0.474, 0.289) | 0.634 |
|  | Anxiety symptoms | 0.188 | (-0.243, 0.619) | 0.393 |
|  | Attention symptoms | 0.385 | (-0.023, 0.792) | 0.064 |
|  | Depressive symptoms | -0.088 | (-0.193, 0.017) | 0.100 |
|  | Hallucinations | -0.01 | (-0.115, 0.096) | 0.857 |
| Substance use and dependence | Alcohol | NA | NA | NA |
|  | Opioid related | 0.002 | (-0.091, 0.094) | 0.971 |
|  | Other substances | 0.101 | (-0.039, 0.241) | 0.157 |
|  | THC | 0.013 | (-0.022, 0.048) | 0.465 |
|  | Tobacco | NA | NA | NA |
| Tic disorders | Tic disorder | -0.052 | (-0.388, 0.283) | 0.760 |

**Supp Table 34.** Estimated risk difference in mental health conditions between the COVID-19 positive cohort and COVID-19 negative cohort for children in severe group

| **Category** | **Cluster** | **Risk difference (%)** | **95% CI (%)** | **P value** |
| --- | --- | --- | --- | --- |
| Composite | At least one incident | 4.481 | (1.189, 7.773) | 0.008 |
| Adverse childhood experiences | Emotional abuse | -0.028 | (-0.157, 0.100) | 0.668 |
|  | Neglect | 0.204 | (-0.006, 0.414) | 0.057 |
|  | Physical abuse | 0.414 | (0.043, 0.784) | 0.029 |
|  | Sexual abuse | 0.102 | (-0.080, 0.284) | 0.271 |
| Anxiety disorders | Anxiety disorder | 1.506 | (0.065, 2.947) | 0.041 |
|  | OCD | -0.061 | (-0.307, 0.185) | 0.625 |
|  | Somatoform disorder | 0.357 | (-0.192, 0.906) | 0.202 |
|  | Stress disorder | 0.684 | (-0.386, 1.754) | 0.210 |
| Disruptive behavior disorders | Conduct disorder | 0.041 | (-0.600, 0.681) | 0.901 |
|  | Impulse control disorder | 0.296 | (-0.258, 0.850) | 0.295 |
|  | Oppositional defiant disorder | 0.199 | (-0.227, 0.625) | 0.359 |
| Eating and feeding disorders | Avoidant restrictive food intake | 0.544 | (-0.126, 1.213) | 0.111 |
|  | Other eating and feeding disorder | 0.092 | (-0.327, 0.511) | 0.668 |
| Elimination disorders | Encopresis | -0.074 | (-0.445, 0.297) | 0.696 |
|  | Enuresis | 0.414 | (-0.192, 1.019) | 0.181 |
| Gender dysphoria sexual dysfunction | Gender dysphoria | 0.074 | (-0.149, 0.297) | 0.515 |
|  | Paraphilia | NA | NA | NA |
|  | Sexual dysfunction | NA | NA | NA |
| Intentional self-harm/suicidality | Parasuicidality | -0.061 | (-0.385, 0.262) | 0.710 |
|  | Suicidality | 0.181 | (-0.115, 0.478) | 0.231 |
| Mood disorders | Bipolar disorder | 0.102 | (-0.195, 0.399) | 0.500 |
|  | Major depression | -0.107 | (-0.447, 0.233) | 0.536 |
|  | Minor depression | 0.319 | (-0.235, 0.873) | 0.259 |
| Neurocognitive disorders | Catatonia | 0.181 | (0.033, 0.330) | 0.017 |
|  | Delirium | 0.355 | (-0.502, 1.212) | 0.417 |
|  | Encephalopathy | 0.094 | (-0.599, 0.788) | 0.790 |
| Neurodevelopmental disorders | Academic developmental disorder | -0.049 | (-0.738, 0.641) | 0.890 |
|  | ADHD | 0.788 | (-0.686, 2.262) | 0.295 |
|  | Autism spectrum disorder | -0.077 | (-1.624, 1.470) | 0.922 |
|  | Communication motor disorder | 1.366 | (-0.586, 3.318) | 0.170 |
|  | Intellectual disability | 0.212 | (-1.764, 2.187) | 0.834 |
| Personality disorders | Personality disorder | 0.209 | (0.013, 0.406) | 0.037 |
| Psychotic disorders | Psychotic disorder | 0.097 | (-0.226, 0.420) | 0.557 |
|  | Schizoaffective disorder | NA | NA | NA |
|  | Schizophrenia | 0.051 | (-0.023, 0.125) | 0.178 |
| Sleep wake disorders | Hypersomnia | 0.089 | (-0.303, 0.482) | 0.655 |
|  | Insomnia | 0.212 | (-0.645, 1.069) | 0.628 |
|  | Parasomnias | 0.033 | (-0.531, 0.597) | 0.908 |
| Standalone symptoms | Anger aggression | -0.112 | (-0.656, 0.432) | 0.686 |
|  | Anxiety symptoms | 0.457 | (-0.307, 1.221) | 0.241 |
|  | Attention symptoms | 0.059 | (-0.650, 0.768) | 0.871 |
|  | Depressive symptoms | -0.028 | (-0.194, 0.138) | 0.740 |
|  | Hallucinations | -0.102 | (-0.312, 0.108) | 0.340 |
| Substance use and dependence | Alcohol | NA | NA | NA |
|  | Opioid related | -0.061 | (-0.349, 0.226) | 0.676 |
|  | Other substances | 0.255 | (-0.012, 0.523) | 0.061 |
|  | THC | NA | NA | NA |
|  | Tobacco | NA | NA | NA |
| Tic disorders | Tic disorder | 0.102 | (-0.276, 0.480) | 0.597 |

**Supp Table 35.** Estimated risk difference in mental health conditions between the COVID-19 positive cohort and COVID-19 negative cohort for youths in asymptomatic group

| **Category** | **Cluster** | **Risk difference (%)** | **95% CI (%)** | **P value** |
| --- | --- | --- | --- | --- |
| Composite | At least one incident | 0.865 | (0.474, 1.255) | <0.001 |
| Adverse childhood experiences | Emotional abuse | 0.006 | (-0.012, 0.023) | 0.545 |
|  | Neglect | 0.004 | (-0.010, 0.017) | 0.575 |
|  | Physical abuse | 0.037 | (-0.003, 0.077) | 0.068 |
|  | Sexual abuse | 0.017 | (-0.018, 0.051) | 0.339 |
| Anxiety disorders | Anxiety disorder | 0.267 | (0.004, 0.530) | 0.047 |
|  | OCD | 0.012 | (-0.057, 0.081) | 0.732 |
|  | Somatoform disorder | 0.044 | (-0.024, 0.112) | 0.205 |
|  | Stress disorder | 0.023 | (-0.146, 0.193) | 0.787 |
| Disruptive behavior disorders | Conduct disorder | -0.048 | (-0.102, 0.007) | 0.085 |
|  | Impulse control disorder | -0.039 | (-0.111, 0.032) | 0.283 |
|  | Oppositional defiant disorder | -0.003 | (-0.068, 0.062) | 0.927 |
| Eating and feeding disorders | Avoidant restrictive food intake | -0.139 | (-0.241, -0.036) | 0.008 |
|  | Other eating and feeding disorder | 0.004 | (-0.017, 0.025) | 0.703 |
| Elimination disorders | Encopresis | 0.011 | (-0.009, 0.031) | 0.286 |
|  | Enuresis | 0.033 | (-0.013, 0.079) | 0.163 |
| Gender dysphoria sexual dysfunction | Gender dysphoria | -0.03 | (-0.098, 0.039) | 0.397 |
|  | Paraphilia | -0.002 | (-0.010, 0.005) | 0.511 |
|  | Sexual dysfunction | -0.002 | (-0.017, 0.013) | 0.764 |
| Intentional self-harm/suicidality | Parasuicidality | -0.016 | (-0.075, 0.043) | 0.598 |
|  | Suicidality | 0.055 | (-0.056, 0.166) | 0.332 |
| Mood disorders | Bipolar disorder | -0.011 | (-0.052, 0.030) | 0.605 |
|  | Major depression | -0.241 | (-0.440, -0.042) | 0.018 |
|  | Minor depression | 0.104 | (-0.097, 0.304) | 0.312 |
| Neurocognitive disorders | Catatonia | 0.004 | (-0.008, 0.016) | 0.485 |
|  | Delirium | 0.078 | (0.016, 0.140) | 0.014 |
|  | Encephalopathy | 0.016 | (-0.007, 0.039) | 0.163 |
| Neurodevelopmental disorders | Academic developmental disorder | 0.051 | (-0.018, 0.120) | 0.151 |
|  | ADHD | 0.374 | (0.154, 0.594) | <0.001 |
|  | Autism spectrum disorder | 0.064 | (-0.056, 0.184) | 0.297 |
|  | Communication motor disorder | 0.028 | (-0.049, 0.105) | 0.483 |
|  | Intellectual disability | 0.031 | (-0.064, 0.125) | 0.526 |
| Personality disorders | Personality disorder | -0.055 | (-0.095, -0.014) | 0.008 |
| Psychotic disorders | Psychotic disorder | -0.004 | (-0.043, 0.034) | 0.831 |
|  | Schizoaffective disorder | -0.007 | (-0.025, 0.010) | 0.416 |
|  | Schizophrenia | -0.012 | (-0.038, 0.013) | 0.351 |
| Sleep wake disorders | Hypersomnia | 0.027 | (-0.012, 0.067) | 0.178 |
|  | Insomnia | 0.08 | (-0.011, 0.171) | 0.085 |
|  | Parasomnias | 0.027 | (-0.012, 0.066) | 0.168 |
| Standalone symptoms | Anger aggression | 0.021 | (-0.042, 0.085) | 0.509 |
|  | Anxiety symptoms | 0.057 | (0.002, 0.111) | 0.041 |
|  | Attention symptoms | 0.052 | (-0.011, 0.116) | 0.108 |
|  | Depressive symptoms | 0.021 | (-0.001, 0.042) | 0.059 |
|  | Hallucinations | 0.013 | (-0.022, 0.048) | 0.473 |
| Substance use and dependence | Alcohol | -0.003 | (-0.034, 0.028) | 0.846 |
|  | Opioid related | -0.001 | (-0.019, 0.018) | 0.958 |
|  | Other substances | -0.012 | (-0.054, 0.030) | 0.575 |
|  | THC | -0.028 | (-0.078, 0.022) | 0.269 |
|  | Tobacco | 0.038 | (-0.027, 0.103) | 0.247 |
| Tic disorders | Tic disorder | 0.051 | (-0.007, 0.109) | 0.087 |

**Supp Table 36.** Estimated risk difference in mental health conditions between the COVID-19 positive cohort and COVID-19 negative cohort for youths in mild group

| **Category** | **Cluster** | **Risk difference (%)** | **95% CI (%)** | **P value** |
| --- | --- | --- | --- | --- |
| Composite | At least one incident | 0.025 | (-0.566, 0.617) | 0.933 |
| Adverse childhood experiences | Emotional abuse | 0.032 | (0.002, 0.061) | 0.036 |
|  | Neglect | 0.003 | (-0.016, 0.021) | 0.790 |
|  | Physical abuse | 0.011 | (-0.045, 0.066) | 0.704 |
|  | Sexual abuse | 0.023 | (-0.026, 0.073) | 0.356 |
| Anxiety disorders | Anxiety disorder | -0.127 | (-0.544, 0.289) | 0.550 |
|  | OCD | 0.06 | (-0.041, 0.160) | 0.246 |
|  | Somatoform disorder | -0.125 | (-0.249, -0.001) | 0.049 |
|  | Stress disorder | 0.025 | (-0.235, 0.284) | 0.853 |
| Disruptive behavior disorders | Conduct disorder | 0.005 | (-0.063, 0.073) | 0.883 |
|  | Impulse control disorder | 0.049 | (-0.049, 0.146) | 0.329 |
|  | Oppositional defiant disorder | 0.044 | (-0.043, 0.131) | 0.327 |
| Eating and feeding disorders | Avoidant restrictive food intake | -0.011 | (-0.167, 0.146) | 0.894 |
|  | Other eating and feeding disorder | 0.004 | (-0.037, 0.046) | 0.833 |
| Elimination disorders | Encopresis | 0.016 | (-0.008, 0.041) | 0.184 |
|  | Enuresis | -0.059 | (-0.126, 0.008) | 0.084 |
| Gender dysphoria sexual dysfunction | Gender dysphoria | -0.019 | (-0.109, 0.072) | 0.687 |
|  | Paraphilia | -0.01 | (-0.022, 0.002) | 0.092 |
|  | Sexual dysfunction | 0.017 | (-0.007, 0.041) | 0.157 |
| Intentional self-harm/suicidality | Parasuicidality | 0.089 | (0.009, 0.169) | 0.030 |
|  | Suicidality | 0.172 | (0.026, 0.319) | 0.021 |
| Mood disorders | Bipolar disorder | 0.003 | (-0.063, 0.070) | 0.926 |
|  | Major depression | -0.131 | (-0.435, 0.173) | 0.399 |
|  | Minor depression | 0.078 | (-0.223, 0.380) | 0.610 |
| Neurocognitive disorders | Catatonia | 0.004 | (-0.013, 0.020) | 0.654 |
|  | Delirium | 0.044 | (-0.054, 0.142) | 0.378 |
|  | Encephalopathy | 0 | (-0.029, 0.029) | 0.998 |
| Neurodevelopmental disorders | Academic developmental disorder | 0.02 | (-0.079, 0.118) | 0.696 |
|  | ADHD | 0.049 | (-0.284, 0.381) | 0.774 |
|  | Autism spectrum disorder | -0.011 | (-0.171, 0.150) | 0.897 |
|  | Communication motor disorder | 0.044 | (-0.065, 0.152) | 0.431 |
|  | Intellectual disability | 0.075 | (-0.046, 0.195) | 0.225 |
| Personality disorders | Personality disorder | -0.001 | (-0.060, 0.058) | 0.972 |
| Psychotic disorders | Psychotic disorder | -0.002 | (-0.060, 0.055) | 0.934 |
|  | Schizoaffective disorder | -0.002 | (-0.025, 0.021) | 0.873 |
|  | Schizophrenia | 0.002 | (-0.031, 0.035) | 0.910 |
| Sleep wake disorders | Hypersomnia | -0.014 | (-0.073, 0.045) | 0.633 |
|  | Insomnia | 0.094 | (-0.049, 0.236) | 0.200 |
|  | Parasomnias | 0.031 | (-0.026, 0.088) | 0.286 |
| Standalone symptoms | Anger aggression | -0.015 | (-0.095, 0.065) | 0.719 |
|  | Anxiety symptoms | 0.048 | (-0.042, 0.137) | 0.297 |
|  | Attention symptoms | 0.114 | (0.015, 0.213) | 0.024 |
|  | Depressive symptoms | 0.04 | (0.007, 0.073) | 0.017 |
|  | Hallucinations | -0.009 | (-0.057, 0.040) | 0.723 |
| Substance use and dependence | Alcohol | -0.016 | (-0.064, 0.033) | 0.524 |
|  | Opioid related | 0.02 | (-0.006, 0.045) | 0.132 |
|  | Other substances | -0.014 | (-0.074, 0.047) | 0.654 |
|  | THC | 0.009 | (-0.065, 0.083) | 0.812 |
|  | Tobacco | -0.032 | (-0.141, 0.076) | 0.558 |
| Tic disorders | Tic disorder | -0.015 | (-0.098, 0.068) | 0.720 |

**Supp Table 37.** Estimated risk difference in mental health conditions between the COVID-19 positive cohort and COVID-19 negative cohort for youths in moderate group

| **Category** | **Cluster** | **Risk difference (%)** | **95% CI (%)** | **P value** |
| --- | --- | --- | --- | --- |
| Composite | At least one incident | 3.007 | (1.125, 4.889) | 0.002 |
| Adverse childhood experiences | Emotional abuse | 0.01 | (-0.058, 0.079) | 0.765 |
|  | Neglect | 0.01 | (-0.058, 0.079) | 0.765 |
|  | Physical abuse | 0.135 | (-0.121, 0.392) | 0.302 |
|  | Sexual abuse | 0 | (-0.168, 0.168) | 1.000 |
| Anxiety disorders | Anxiety disorder | 1.418 | (0.031, 2.804) | 0.045 |
|  | OCD | -0.004 | (-0.367, 0.359) | 0.983 |
|  | Somatoform disorder | 0.108 | (-0.313, 0.530) | 0.615 |
|  | Stress disorder | 1.388 | (0.518, 2.258) | 0.002 |
| Disruptive behavior disorders | Conduct disorder | -0.003 | (-0.270, 0.265) | 0.984 |
|  | Impulse control disorder | 0.032 | (-0.293, 0.358) | 0.846 |
|  | Oppositional defiant disorder | 0.116 | (-0.203, 0.434) | 0.477 |
| Eating and feeding disorders | Avoidant restrictive food intake | 0.272 | (-0.367, 0.911) | 0.404 |
|  | Other eating and feeding disorder | 0.056 | (-0.131, 0.242) | 0.559 |
| Elimination disorders | Encopresis | -0.009 | (-0.109, 0.091) | 0.859 |
|  | Enuresis | -0.105 | (-0.341, 0.131) | 0.385 |
| Gender dysphoria sexual dysfunction | Gender dysphoria | -0.161 | (-0.468, 0.145) | 0.303 |
|  | Paraphilia | NA | NA | NA |
|  | Sexual dysfunction | -0.017 | (-0.059, 0.025) | 0.432 |
| Intentional self-harm/suicidality | Parasuicidality | 0.043 | (-0.272, 0.358) | 0.790 |
|  | Suicidality | 0.445 | (-0.105, 0.995) | 0.112 |
| Mood disorders | Bipolar disorder | -0.055 | (-0.266, 0.157) | 0.613 |
|  | Major depression | 0.508 | (-0.508, 1.525) | 0.327 |
|  | Minor depression | 1.235 | (0.212, 2.259) | 0.018 |
| Neurocognitive disorders | Catatonia | 0.041 | (-0.091, 0.174) | 0.541 |
|  | Delirium | 0.135 | (-0.297, 0.567) | 0.541 |
|  | Encephalopathy | 0.04 | (-0.126, 0.206) | 0.636 |
| Neurodevelopmental disorders | Academic developmental disorder | -0.053 | (-0.426, 0.319) | 0.779 |
|  | ADHD | 1.036 | (0.071, 2.001) | 0.035 |
|  | Autism spectrum disorder | 0.143 | (-0.492, 0.779) | 0.659 |
|  | Communication motor disorder | 0.422 | (-0.020, 0.864) | 0.062 |
|  | Intellectual disability | 0.705 | (0.038, 1.371) | 0.038 |
| Personality disorders | Personality disorder | 0.119 | (-0.128, 0.367) | 0.344 |
| Psychotic disorders | Psychotic disorder | 0.047 | (-0.181, 0.274) | 0.689 |
|  | Schizoaffective disorder | 0.06 | (-0.073, 0.193) | 0.379 |
|  | Schizophrenia | 0.11 | (-0.056, 0.277) | 0.194 |
| Sleep wake disorders | Hypersomnia | -0.078 | (-0.318, 0.162) | 0.525 |
|  | Insomnia | 0.267 | (-0.278, 0.813) | 0.337 |
|  | Parasomnias | 0.016 | (-0.204, 0.235) | 0.890 |
| Standalone symptoms | Anger aggression | 0.344 | (0.049, 0.640) | 0.023 |
|  | Anxiety symptoms | 0.446 | (0.051, 0.842) | 0.027 |
|  | Attention symptoms | 0.055 | (-0.224, 0.333) | 0.701 |
|  | Depressive symptoms | -0.044 | (-0.141, 0.053) | 0.373 |
|  | Hallucinations | 0.006 | (-0.177, 0.190) | 0.945 |
| Substance use and dependence | Alcohol | -0.105 | (-0.278, 0.068) | 0.234 |
|  | Opioid related | 0.046 | (-0.117, 0.208) | 0.584 |
|  | Other substances | 0.131 | (-0.108, 0.370) | 0.282 |
|  | THC | -0.089 | (-0.414, 0.236) | 0.593 |
|  | Tobacco | -0.074 | (-0.472, 0.324) | 0.716 |
| Tic disorders | Tic disorder | 0.075 | (-0.181, 0.332) | 0.566 |

**Supp Table 38.** Estimated risk difference in mental health conditions between the COVID-19 positive cohort and COVID-19 negative cohort for youths in severe group

| **Category** | **Cluster** | **Risk difference (%)** | **95% CI (%)** | **P value** |
| --- | --- | --- | --- | --- |
| Composite | At least one incident | 4.077 | (1.539, 6.615) | 0.002 |
| Adverse childhood experiences | Emotional abuse | 0.016 | (-0.025, 0.057) | 0.454 |
|  | Neglect | 0 | (-0.129, 0.129) | 1.000 |
|  | Physical abuse | -0.006 | (-0.251, 0.240) | 0.964 |
|  | Sexual abuse | -0.062 | (-0.236, 0.111) | 0.480 |
| Anxiety disorders | Anxiety disorder | 1.989 | (0.281, 3.696) | 0.022 |
|  | OCD | -0.081 | (-0.521, 0.358) | 0.716 |
|  | Somatoform disorder | -0.189 | (-0.798, 0.419) | 0.542 |
|  | Stress disorder | -0.063 | (-1.144, 1.018) | 0.909 |
| Disruptive behavior disorders | Conduct disorder | -0.212 | (-0.586, 0.162) | 0.267 |
|  | Impulse control disorder | 0.168 | (-0.296, 0.633) | 0.478 |
|  | Oppositional defiant disorder | -0.084 | (-0.460, 0.293) | 0.663 |
| Eating and feeding disorders | Avoidant restrictive food intake | -0.101 | (-0.853, 0.651) | 0.792 |
|  | Other eating and feeding disorder | 0.031 | (-0.214, 0.276) | 0.803 |
| Elimination disorders | Encopresis | 0.134 | (0.011, 0.257) | 0.032 |
|  | Enuresis | 0.336 | (0.036, 0.636) | 0.028 |
| Gender dysphoria sexual dysfunction | Gender dysphoria | 0.09 | (-0.263, 0.444) | 0.616 |
|  | Paraphilia | 0.028 | (-0.013, 0.069) | 0.181 |
|  | Sexual dysfunction | 0.012 | (-0.046, 0.070) | 0.677 |
| Intentional self-harm/suicidality | Parasuicidality | 0.075 | (-0.357, 0.506) | 0.734 |
|  | Suicidality | -0.19 | (-0.894, 0.515) | 0.598 |
| Mood disorders | Bipolar disorder | 0.049 | (-0.267, 0.366) | 0.761 |
|  | Major depression | 0.055 | (-1.173, 1.283) | 0.930 |
|  | Minor depression | 0.48 | (-0.671, 1.631) | 0.414 |
| Neurocognitive disorders | Catatonia | -0.066 | (-0.286, 0.154) | 0.558 |
|  | Delirium | 0.932 | (0.126, 1.737) | 0.023 |
|  | Encephalopathy | 0.132 | (-0.362, 0.626) | 0.601 |
| Neurodevelopmental disorders | Academic developmental disorder | 0.273 | (-0.212, 0.759) | 0.270 |
|  | ADHD | 0.29 | (-0.858, 1.438) | 0.620 |
|  | Autism spectrum disorder | 0.119 | (-0.893, 1.132) | 0.817 |
|  | Communication motor disorder | 0.73 | (-0.028, 1.487) | 0.059 |
|  | Intellectual disability | 0.605 | (-0.714, 1.923) | 0.369 |
| Personality disorders | Personality disorder | 0.029 | (-0.336, 0.394) | 0.876 |
| Psychotic disorders | Psychotic disorder | 0.146 | (-0.321, 0.613) | 0.539 |
|  | Schizoaffective disorder | 0.096 | (-0.051, 0.243) | 0.202 |
|  | Schizophrenia | -0.007 | (-0.259, 0.245) | 0.959 |
| Sleep wake disorders | Hypersomnia | 0.006 | (-0.326, 0.337) | 0.974 |
|  | Insomnia | 0.114 | (-0.709, 0.937) | 0.786 |
|  | Parasomnias | -0.044 | (-0.360, 0.273) | 0.788 |
| Standalone symptoms | Anger aggression | 0.094 | (-0.342, 0.529) | 0.673 |
|  | Anxiety symptoms | 0.407 | (-0.150, 0.964) | 0.152 |
|  | Attention symptoms | 0.387 | (-0.079, 0.854) | 0.104 |
|  | Depressive symptoms | -0.09 | (-0.226, 0.045) | 0.192 |
|  | Hallucinations | 0.081 | (-0.240, 0.403) | 0.620 |
| Substance use and dependence | Alcohol | 0.235 | (-0.016, 0.487) | 0.067 |
|  | Opioid related | -0.297 | (-0.588, -0.005) | 0.046 |
|  | Other substances | 0.142 | (-0.237, 0.520) | 0.463 |
|  | THC | -0.041 | (-0.443, 0.361) | 0.841 |
|  | Tobacco | 0.068 | (-0.445, 0.582) | 0.794 |
| Tic disorders | Tic disorder | -0.057 | (-0.403, 0.290) | 0.748 |

# Reference

1. Chapter 12 Population-Level Estimation | The Book of OHDSI. https://ohdsi.github.io/TheBookOfOhdsi/PopulationLevelEstimation.html.

2. Walker, A. M. et al. A tool for assessing the feasibility of comparative effectiveness research. Comparative Effectiveness Research 3, 11–20 (2013).
